# Supplementary material for: A novel in silico method employs chemical and protein similarity algorithms to accurately identify chemical transformations in the human gut microbiome
Source: bioRxiv preprint, doi:10.1101/2022.08.02.502504, version 2 (2022-08-11)
Supplement: Figure 3 - source data [file 502504_file02.xlsx]

## Sheet: Figure 3A
Reaction rank (percentile)	Reaction conducted by Shared/Different enzyme
1.2633	Shared enzyme
0.0221631	Shared enzyme
0.0221631	Shared enzyme
0.0221631	Shared enzyme
0.0221631	Shared enzyme
0.0221631	Shared enzyme
0.0221631	Shared enzyme
0.0221631	Shared enzyme
3.50731	Shared enzyme
3.50731	Shared enzyme
0.0664894	Shared enzyme
0.0664894	Shared enzyme
0.0664894	Shared enzyme
0.0664894	Shared enzyme
0.0664894	Shared enzyme
0.0664894	Shared enzyme
0.0664894	Shared enzyme
0.0664894	Shared enzyme
0.0664894	Shared enzyme
0.0664894	Shared enzyme
0.0110816	Shared enzyme
0.0110816	Shared enzyme
0.0110816	Shared enzyme
0.0110816	Shared enzyme
0.0110816	Shared enzyme
0.0110816	Shared enzyme
0.0110816	Shared enzyme
0.0110816	Shared enzyme
0.0110816	Shared enzyme
0.0110816	Shared enzyme
0.0110816	Shared enzyme
0.0110816	Shared enzyme
0.0110816	Shared enzyme
0.0110816	Shared enzyme
0.0110816	Shared enzyme
0.0110816	Shared enzyme
0.0110816	Shared enzyme
0.0110816	Shared enzyme
0.0110816	Shared enzyme
0.0110816	Shared enzyme
0.21055	Shared enzyme
0.0110816	Shared enzyme
0.0110816	Shared enzyme
0.0110816	Shared enzyme
0.0110816	Shared enzyme
0.0110816	Shared enzyme
0.0110816	Shared enzyme
0.0110816	Shared enzyme
0.0110816	Shared enzyme
0.0110816	Shared enzyme
0.0110816	Shared enzyme
0.0110816	Shared enzyme
0.0110816	Shared enzyme
0.0110816	Shared enzyme
0.0110816	Shared enzyme
0.0110816	Shared enzyme
0.0110816	Shared enzyme
0.0110816	Shared enzyme
0.0110816	Shared enzyme
0.0110816	Shared enzyme
0.0110816	Shared enzyme
0.0110816	Shared enzyme
0.0110816	Shared enzyme
0.0110816	Shared enzyme
0.0110816	Shared enzyme
1.90603	Shared enzyme
0.0443262	Shared enzyme
0.78125	Shared enzyme
0.78125	Shared enzyme
0.0166223	Shared enzyme
0.0443262	Shared enzyme
0.0277039	Shared enzyme
0.542996	Shared enzyme
0.0277039	Shared enzyme
0.0277039	Shared enzyme
0.0277039	Shared enzyme
0.0277039	Shared enzyme
0.0277039	Shared enzyme
0.0277039	Shared enzyme
0.0277039	Shared enzyme
0.0277039	Shared enzyme
0.0277039	Shared enzyme
0.0277039	Shared enzyme
0.0277039	Shared enzyme
0.0277039	Shared enzyme
0.0277039	Shared enzyme
0.0277039	Shared enzyme
0.0277039	Shared enzyme
0.0277039	Shared enzyme
0.0277039	Shared enzyme
0.0277039	Shared enzyme
0.0277039	Shared enzyme
0.0277039	Shared enzyme
0.0277039	Shared enzyme
0.0277039	Shared enzyme
0.0277039	Shared enzyme
0.0277039	Shared enzyme
0.0277039	Shared enzyme
0.0277039	Shared enzyme
0.0277039	Shared enzyme
0.0277039	Shared enzyme
0.0277039	Shared enzyme
0.0277039	Shared enzyme
0.0277039	Shared enzyme
0.0277039	Shared enzyme
0.0277039	Shared enzyme
0.0277039	Shared enzyme
0.0277039	Shared enzyme
0.0277039	Shared enzyme
0.0277039	Shared enzyme
0.0277039	Shared enzyme
0.0277039	Shared enzyme
0.0277039	Shared enzyme
0.0277039	Shared enzyme
0.0277039	Shared enzyme
0.0277039	Shared enzyme
0.0277039	Shared enzyme
0.0277039	Shared enzyme
0.0277039	Shared enzyme
0.0277039	Shared enzyme
0.0277039	Shared enzyme
0.0277039	Shared enzyme
0.0277039	Shared enzyme
0.0277039	Shared enzyme
0.0277039	Shared enzyme
0.0277039	Shared enzyme
0.0277039	Shared enzyme
0.0277039	Shared enzyme
0.0277039	Shared enzyme
0.0277039	Shared enzyme
0.0277039	Shared enzyme
0.0277039	Shared enzyme
0.0277039	Shared enzyme
0.0277039	Shared enzyme
0.0277039	Shared enzyme
0.0277039	Shared enzyme
0.0277039	Shared enzyme
0.0277039	Shared enzyme
0.0277039	Shared enzyme
0.0277039	Shared enzyme
0.0277039	Shared enzyme
0.0277039	Shared enzyme
0.0277039	Shared enzyme
0.0277039	Shared enzyme
0.0277039	Shared enzyme
0.0277039	Shared enzyme
0.0277039	Shared enzyme
0.0277039	Shared enzyme
0.0277039	Shared enzyme
0.0277039	Shared enzyme
0.0277039	Shared enzyme
0.0277039	Shared enzyme
0.0277039	Shared enzyme
0.0277039	Shared enzyme
0.0277039	Shared enzyme
0.0277039	Shared enzyme
0.0277039	Shared enzyme
0.0277039	Shared enzyme
0.0277039	Shared enzyme
0.0277039	Shared enzyme
0.0277039	Shared enzyme
0.0277039	Shared enzyme
0.0277039	Shared enzyme
0.0277039	Shared enzyme
0.0277039	Shared enzyme
0.0277039	Shared enzyme
0.0277039	Shared enzyme
0.0277039	Shared enzyme
0.0277039	Shared enzyme
0.0277039	Shared enzyme
0.0277039	Shared enzyme
0.0277039	Shared enzyme
0.0277039	Shared enzyme
0.0277039	Shared enzyme
0.0277039	Shared enzyme
0.0277039	Shared enzyme
0.0277039	Shared enzyme
0.0277039	Shared enzyme
0.0277039	Shared enzyme
0.0277039	Shared enzyme
0.0277039	Shared enzyme
0.0277039	Shared enzyme
0.0277039	Shared enzyme
0.0277039	Shared enzyme
0.0277039	Shared enzyme
0.0277039	Shared enzyme
0.0277039	Shared enzyme
0.0277039	Shared enzyme
0.0277039	Shared enzyme
0.0277039	Shared enzyme
0.0277039	Shared enzyme
0.0277039	Shared enzyme
0.0277039	Shared enzyme
0.0277039	Shared enzyme
0.0277039	Shared enzyme
0.0277039	Shared enzyme
0.0277039	Shared enzyme
0.0277039	Shared enzyme
0.0277039	Shared enzyme
0.0277039	Shared enzyme
0.0277039	Shared enzyme
0.0277039	Shared enzyme
0.0277039	Shared enzyme
0.0277039	Shared enzyme
0.0277039	Shared enzyme
0.0277039	Shared enzyme
0.0277039	Shared enzyme
0.0277039	Shared enzyme
0.0277039	Shared enzyme
0.0277039	Shared enzyme
0.0277039	Shared enzyme
0.0277039	Shared enzyme
0.0277039	Shared enzyme
0.0277039	Shared enzyme
0.0277039	Shared enzyme
0.0277039	Shared enzyme
0.0277039	Shared enzyme
0.0277039	Shared enzyme
0.0277039	Shared enzyme
0.0277039	Shared enzyme
0.0277039	Shared enzyme
0.0277039	Shared enzyme
0.0277039	Shared enzyme
0.0277039	Shared enzyme
0.0277039	Shared enzyme
0.0277039	Shared enzyme
0.0277039	Shared enzyme
0.0277039	Shared enzyme
0.0277039	Shared enzyme
0.0277039	Shared enzyme
0.0277039	Shared enzyme
0.0277039	Shared enzyme
0.0277039	Shared enzyme
0.0277039	Shared enzyme
0.0277039	Shared enzyme
0.0277039	Shared enzyme
0.0277039	Shared enzyme
0.0277039	Shared enzyme
0.0277039	Shared enzyme
0.0277039	Shared enzyme
0.0277039	Shared enzyme
0.0277039	Shared enzyme
0.0277039	Shared enzyme
0.0277039	Shared enzyme
0.0277039	Shared enzyme
0.0277039	Shared enzyme
0.0277039	Shared enzyme
0.0277039	Shared enzyme
0.0277039	Shared enzyme
0.0277039	Shared enzyme
0.0277039	Shared enzyme
0.0277039	Shared enzyme
0.0277039	Shared enzyme
0.0277039	Shared enzyme
0.0277039	Shared enzyme
0.0277039	Shared enzyme
0.0277039	Shared enzyme
0.0277039	Shared enzyme
0.0277039	Shared enzyme
0.0277039	Shared enzyme
0.0277039	Shared enzyme
0.0277039	Shared enzyme
0.0277039	Shared enzyme
0.0277039	Shared enzyme
0.0277039	Shared enzyme
0.0277039	Shared enzyme
0.0277039	Shared enzyme
0.0277039	Shared enzyme
0.0277039	Shared enzyme
0.0277039	Shared enzyme
0.0277039	Shared enzyme
0.0277039	Shared enzyme
0.0277039	Shared enzyme
0.0277039	Shared enzyme
0.0277039	Shared enzyme
0.0277039	Shared enzyme
0.0277039	Shared enzyme
0.0277039	Shared enzyme
0.0277039	Shared enzyme
0.0277039	Shared enzyme
0.0277039	Shared enzyme
0.0277039	Shared enzyme
0.0277039	Shared enzyme
0.0277039	Shared enzyme
0.0277039	Shared enzyme
0.0277039	Shared enzyme
0.0277039	Shared enzyme
0.0277039	Shared enzyme
0.0277039	Shared enzyme
0.0277039	Shared enzyme
0.0277039	Shared enzyme
0.0277039	Shared enzyme
0.0277039	Shared enzyme
0.0277039	Shared enzyme
0.0277039	Shared enzyme
0.0277039	Shared enzyme
0.0277039	Shared enzyme
0.0277039	Shared enzyme
0.0277039	Shared enzyme
0.0277039	Shared enzyme
0.0277039	Shared enzyme
0.0277039	Shared enzyme
0.0277039	Shared enzyme
0.0277039	Shared enzyme
0.0277039	Shared enzyme
0.0277039	Shared enzyme
0.0277039	Shared enzyme
0.0277039	Shared enzyme
0.0277039	Shared enzyme
0.0277039	Shared enzyme
0.0277039	Shared enzyme
0.0277039	Shared enzyme
0.0277039	Shared enzyme
0.0277039	Shared enzyme
0.0277039	Shared enzyme
0.0277039	Shared enzyme
0.0277039	Shared enzyme
0.0277039	Shared enzyme
0.0277039	Shared enzyme
0.0277039	Shared enzyme
0.0277039	Shared enzyme
0.0277039	Shared enzyme
0.0277039	Shared enzyme
0.0277039	Shared enzyme
0.0277039	Shared enzyme
0.0277039	Shared enzyme
0.0277039	Shared enzyme
0.0277039	Shared enzyme
0.0277039	Shared enzyme
0.0277039	Shared enzyme
0.0277039	Shared enzyme
0.0277039	Shared enzyme
0.0277039	Shared enzyme
0.0277039	Shared enzyme
0.0277039	Shared enzyme
0.0277039	Shared enzyme
0.0277039	Shared enzyme
0.0277039	Shared enzyme
0.0277039	Shared enzyme
0.0277039	Shared enzyme
0.0277039	Shared enzyme
0.0277039	Shared enzyme
0.0277039	Shared enzyme
0.0277039	Shared enzyme
0.0277039	Shared enzyme
0.0277039	Shared enzyme
0.0277039	Shared enzyme
0.0277039	Shared enzyme
0.0277039	Shared enzyme
0.0277039	Shared enzyme
0.0277039	Shared enzyme
0.0277039	Shared enzyme
0.0277039	Shared enzyme
0.0277039	Shared enzyme
0.0277039	Shared enzyme
0.0277039	Shared enzyme
0.0277039	Shared enzyme
0.0277039	Shared enzyme
0.0277039	Shared enzyme
0.0277039	Shared enzyme
0.0277039	Shared enzyme
0.0277039	Shared enzyme
0.0277039	Shared enzyme
0.0277039	Shared enzyme
0.0277039	Shared enzyme
0.0277039	Shared enzyme
0.0277039	Shared enzyme
0.0277039	Shared enzyme
0.0277039	Shared enzyme
0.0277039	Shared enzyme
0.0277039	Shared enzyme
0.0277039	Shared enzyme
0.0277039	Shared enzyme
0.0277039	Shared enzyme
0.0277039	Shared enzyme
0.0277039	Shared enzyme
0.0277039	Shared enzyme
0.0277039	Shared enzyme
0.0277039	Shared enzyme
0.0277039	Shared enzyme
0.0277039	Shared enzyme
0.0277039	Shared enzyme
0.0277039	Shared enzyme
0.0277039	Shared enzyme
0.0277039	Shared enzyme
0.0277039	Shared enzyme
0.0277039	Shared enzyme
0.0277039	Shared enzyme
0.0277039	Shared enzyme
0.0277039	Shared enzyme
0.0277039	Shared enzyme
0.0277039	Shared enzyme
0.0277039	Shared enzyme
0.0277039	Shared enzyme
0.0277039	Shared enzyme
0.0277039	Shared enzyme
0.0277039	Shared enzyme
0.0277039	Shared enzyme
0.0277039	Shared enzyme
0.0277039	Shared enzyme
0.0277039	Shared enzyme
0.0277039	Shared enzyme
0.0277039	Shared enzyme
0.0277039	Shared enzyme
0.0277039	Shared enzyme
0.0277039	Shared enzyme
0.0277039	Shared enzyme
0.0277039	Shared enzyme
0.0277039	Shared enzyme
0.0277039	Shared enzyme
0.0277039	Shared enzyme
0.0277039	Shared enzyme
0.0277039	Shared enzyme
0.0277039	Shared enzyme
0.0277039	Shared enzyme
0.0277039	Shared enzyme
0.0277039	Shared enzyme
0.0277039	Shared enzyme
0.0277039	Shared enzyme
0.0277039	Shared enzyme
0.0277039	Shared enzyme
0.0277039	Shared enzyme
0.0277039	Shared enzyme
0.0277039	Shared enzyme
0.0277039	Shared enzyme
0.0277039	Shared enzyme
0.0277039	Shared enzyme
0.0277039	Shared enzyme
0.0277039	Shared enzyme
0.0277039	Shared enzyme
0.0277039	Shared enzyme
0.0277039	Shared enzyme
0.0277039	Shared enzyme
0.0277039	Shared enzyme
0.0277039	Shared enzyme
0.0277039	Shared enzyme
0.0277039	Shared enzyme
0.0277039	Shared enzyme
0.0277039	Shared enzyme
0.0277039	Shared enzyme
0.0277039	Shared enzyme
0.0277039	Shared enzyme
0.0277039	Shared enzyme
0.0277039	Shared enzyme
0.0277039	Shared enzyme
0.0277039	Shared enzyme
0.0277039	Shared enzyme
0.0277039	Shared enzyme
0.0277039	Shared enzyme
0.0277039	Shared enzyme
0.0277039	Shared enzyme
0.0277039	Shared enzyme
0.0277039	Shared enzyme
0.0277039	Shared enzyme
0.0277039	Shared enzyme
0.0277039	Shared enzyme
0.0277039	Shared enzyme
0.0277039	Shared enzyme
0.0277039	Shared enzyme
0.0277039	Shared enzyme
0.0277039	Shared enzyme
0.0277039	Shared enzyme
0.0277039	Shared enzyme
0.0277039	Shared enzyme
0.0277039	Shared enzyme
0.0277039	Shared enzyme
0.0277039	Shared enzyme
0.0277039	Shared enzyme
0.0277039	Shared enzyme
0.0277039	Shared enzyme
0.0277039	Shared enzyme
0.0277039	Shared enzyme
0.0277039	Shared enzyme
0.0277039	Shared enzyme
0.0277039	Shared enzyme
0.0277039	Shared enzyme
0.0277039	Shared enzyme
0.0277039	Shared enzyme
0.0277039	Shared enzyme
0.0277039	Shared enzyme
0.0277039	Shared enzyme
0.0277039	Shared enzyme
0.0277039	Shared enzyme
0.0277039	Shared enzyme
0.0277039	Shared enzyme
0.0277039	Shared enzyme
0.0277039	Shared enzyme
0.0277039	Shared enzyme
0.0277039	Shared enzyme
0.0277039	Shared enzyme
0.0277039	Shared enzyme
0.0277039	Shared enzyme
0.0277039	Shared enzyme
0.0277039	Shared enzyme
0.0277039	Shared enzyme
0.0277039	Shared enzyme
0.0277039	Shared enzyme
0.0277039	Shared enzyme
0.0277039	Shared enzyme
0.0277039	Shared enzyme
0.0277039	Shared enzyme
0.0277039	Shared enzyme
0.0277039	Shared enzyme
0.0277039	Shared enzyme
0.0277039	Shared enzyme
0.0277039	Shared enzyme
0.0277039	Shared enzyme
0.0277039	Shared enzyme
0.0277039	Shared enzyme
0.0277039	Shared enzyme
0.0277039	Shared enzyme
0.0277039	Shared enzyme
0.0277039	Shared enzyme
0.0277039	Shared enzyme
0.0277039	Shared enzyme
0.0277039	Shared enzyme
0.0277039	Shared enzyme
0.0277039	Shared enzyme
0.0277039	Shared enzyme
0.0277039	Shared enzyme
0.0277039	Shared enzyme
0.0277039	Shared enzyme
0.0277039	Shared enzyme
0.0277039	Shared enzyme
0.0277039	Shared enzyme
0.0277039	Shared enzyme
0.0277039	Shared enzyme
0.0277039	Shared enzyme
0.0277039	Shared enzyme
0.0277039	Shared enzyme
0.0277039	Shared enzyme
0.0277039	Shared enzyme
0.0277039	Shared enzyme
0.0277039	Shared enzyme
0.0277039	Shared enzyme
0.0277039	Shared enzyme
0.0277039	Shared enzyme
0.0277039	Shared enzyme
0.0277039	Shared enzyme
0.0277039	Shared enzyme
0.0277039	Shared enzyme
0.0277039	Shared enzyme
0.0277039	Shared enzyme
0.0277039	Shared enzyme
0.0277039	Shared enzyme
0.0277039	Shared enzyme
0.0277039	Shared enzyme
0.0277039	Shared enzyme
0.0277039	Shared enzyme
0.0277039	Shared enzyme
0.0277039	Shared enzyme
0.0277039	Shared enzyme
0.0277039	Shared enzyme
0.0277039	Shared enzyme
0.0277039	Shared enzyme
0.0277039	Shared enzyme
0.0277039	Shared enzyme
0.0277039	Shared enzyme
0.0277039	Shared enzyme
0.0277039	Shared enzyme
0.0277039	Shared enzyme
0.0277039	Shared enzyme
0.0277039	Shared enzyme
0.0277039	Shared enzyme
0.0277039	Shared enzyme
0.0277039	Shared enzyme
0.0277039	Shared enzyme
0.0277039	Shared enzyme
0.0277039	Shared enzyme
0.0277039	Shared enzyme
0.0277039	Shared enzyme
0.0277039	Shared enzyme
0.0277039	Shared enzyme
0.0277039	Shared enzyme
0.0277039	Shared enzyme
0.0277039	Shared enzyme
0.0277039	Shared enzyme
0.0277039	Shared enzyme
0.0277039	Shared enzyme
0.0277039	Shared enzyme
0.0277039	Shared enzyme
0.0277039	Shared enzyme
0.0277039	Shared enzyme
0.0277039	Shared enzyme
0.0277039	Shared enzyme
0.0277039	Shared enzyme
0.0277039	Shared enzyme
0.0277039	Shared enzyme
0.0277039	Shared enzyme
0.0277039	Shared enzyme
0.0277039	Shared enzyme
0.0277039	Shared enzyme
0.0277039	Shared enzyme
0.0277039	Shared enzyme
0.0277039	Shared enzyme
0.0277039	Shared enzyme
0.0277039	Shared enzyme
0.0277039	Shared enzyme
0.0277039	Shared enzyme
0.0277039	Shared enzyme
0.0277039	Shared enzyme
0.0277039	Shared enzyme
0.0277039	Shared enzyme
0.0277039	Shared enzyme
0.0277039	Shared enzyme
0.0277039	Shared enzyme
0.0277039	Shared enzyme
0.0277039	Shared enzyme
0.0277039	Shared enzyme
0.0277039	Shared enzyme
0.0277039	Shared enzyme
0.0277039	Shared enzyme
0.0277039	Shared enzyme
0.0277039	Shared enzyme
0.0277039	Shared enzyme
0.0277039	Shared enzyme
0.0277039	Shared enzyme
0.0277039	Shared enzyme
0.0277039	Shared enzyme
0.0277039	Shared enzyme
0.0277039	Shared enzyme
0.0277039	Shared enzyme
0.0277039	Shared enzyme
0.0277039	Shared enzyme
0.0277039	Shared enzyme
0.0277039	Shared enzyme
0.0277039	Shared enzyme
0.0277039	Shared enzyme
0.0277039	Shared enzyme
0.0277039	Shared enzyme
0.0277039	Shared enzyme
0.0277039	Shared enzyme
0.0277039	Shared enzyme
0.0277039	Shared enzyme
0.0277039	Shared enzyme
0.0277039	Shared enzyme
0.0277039	Shared enzyme
0.0277039	Shared enzyme
0.0277039	Shared enzyme
0.0277039	Shared enzyme
0.0277039	Shared enzyme
0.0277039	Shared enzyme
0.0277039	Shared enzyme
0.0277039	Shared enzyme
0.0277039	Shared enzyme
0.0277039	Shared enzyme
0.0277039	Shared enzyme
0.0277039	Shared enzyme
0.0277039	Shared enzyme
0.0277039	Shared enzyme
0.0277039	Shared enzyme
0.0277039	Shared enzyme
0.0277039	Shared enzyme
0.0277039	Shared enzyme
0.0277039	Shared enzyme
0.0166223	Shared enzyme
6.8207	Shared enzyme
0.0110816	Shared enzyme
32.0756	Shared enzyme
32.0756	Shared enzyme
10.7879	Shared enzyme
7.4191	Shared enzyme
7.4191	Shared enzyme
7.4191	Shared enzyme
7.4191	Shared enzyme
7.4191	Shared enzyme
7.4191	Shared enzyme
7.4191	Shared enzyme
7.4191	Shared enzyme
7.4191	Shared enzyme
7.4191	Shared enzyme
7.4191	Shared enzyme
8.19481	Shared enzyme
8.19481	Shared enzyme
8.19481	Shared enzyme
8.19481	Shared enzyme
8.19481	Shared enzyme
8.19481	Shared enzyme
8.19481	Shared enzyme
8.19481	Shared enzyme
8.19481	Shared enzyme
8.19481	Shared enzyme
8.19481	Shared enzyme
8.19481	Shared enzyme
8.19481	Shared enzyme
8.19481	Shared enzyme
8.19481	Shared enzyme
8.19481	Shared enzyme
8.19481	Shared enzyme
8.19481	Shared enzyme
8.19481	Shared enzyme
8.19481	Shared enzyme
8.19481	Shared enzyme
8.19481	Shared enzyme
8.19481	Shared enzyme
8.19481	Shared enzyme
8.19481	Shared enzyme
8.19481	Shared enzyme
8.19481	Shared enzyme
8.19481	Shared enzyme
8.19481	Shared enzyme
8.19481	Shared enzyme
8.19481	Shared enzyme
8.19481	Shared enzyme
8.19481	Shared enzyme
8.19481	Shared enzyme
2.76485	Shared enzyme
2.75931	Shared enzyme
2.72052	Shared enzyme
2.72052	Shared enzyme
0.487589	Shared enzyme
0.487589	Shared enzyme
0.487589	Shared enzyme
0.487589	Shared enzyme
0.487589	Shared enzyme
0.487589	Shared enzyme
0.487589	Shared enzyme
0.487589	Shared enzyme
0.487589	Shared enzyme
0.487589	Shared enzyme
49.6509	Shared enzyme
49.6509	Shared enzyme
49.6509	Shared enzyme
49.6509	Shared enzyme
0.149601	Shared enzyme
0.149601	Shared enzyme
0.149601	Shared enzyme
0.149601	Shared enzyme
0.149601	Shared enzyme
0.149601	Shared enzyme
0.149601	Shared enzyme
0.149601	Shared enzyme
0.149601	Shared enzyme
0.149601	Shared enzyme
0.149601	Shared enzyme
0.149601	Shared enzyme
0.149601	Shared enzyme
0.149601	Shared enzyme
0.149601	Shared enzyme
0.149601	Shared enzyme
0.149601	Shared enzyme
0.149601	Shared enzyme
0.149601	Shared enzyme
0.149601	Shared enzyme
0.149601	Shared enzyme
0.149601	Shared enzyme
0.149601	Shared enzyme
0.149601	Shared enzyme
0.149601	Shared enzyme
0.149601	Shared enzyme
0.149601	Shared enzyme
0.149601	Shared enzyme
0.149601	Shared enzyme
0.149601	Shared enzyme
0.149601	Shared enzyme
0.171764	Shared enzyme
1.60683	Shared enzyme
1.60683	Shared enzyme
0.0110816	Shared enzyme
0.0110816	Shared enzyme
0.0110816	Shared enzyme
0.0110816	Shared enzyme
0.0110816	Shared enzyme
0.0110816	Shared enzyme
14.8881	Shared enzyme
14.8881	Shared enzyme
14.8881	Shared enzyme
14.8881	Shared enzyme
14.8881	Shared enzyme
14.8881	Shared enzyme
0.265957	Shared enzyme
0.0221631	Shared enzyme
0.0110816	Shared enzyme
0.343528	Shared enzyme
0.343528	Shared enzyme
0.343528	Shared enzyme
0.343528	Shared enzyme
10.4499	Shared enzyme
0.049867	Shared enzyme
0.049867	Shared enzyme
0.049867	Shared enzyme
0.049867	Shared enzyme
0.049867	Shared enzyme
0.049867	Shared enzyme
0.049867	Shared enzyme
0.049867	Shared enzyme
0.049867	Shared enzyme
0.049867	Shared enzyme
0.049867	Shared enzyme
0.049867	Shared enzyme
0.049867	Shared enzyme
0.049867	Shared enzyme
0.0110816	Shared enzyme
0.0332447	Shared enzyme
0.0332447	Shared enzyme
0.0332447	Shared enzyme
0.0332447	Shared enzyme
0.0332447	Shared enzyme
0.0332447	Shared enzyme
0.0332447	Shared enzyme
0.0332447	Shared enzyme
0.0332447	Shared enzyme
0.0332447	Shared enzyme
0.0332447	Shared enzyme
0.0332447	Shared enzyme
0.0332447	Shared enzyme
0.0166223	Shared enzyme
0.0166223	Shared enzyme
0.0166223	Shared enzyme
0.0166223	Shared enzyme
0.0166223	Shared enzyme
0.0166223	Shared enzyme
4.46033	Shared enzyme
4.46033	Shared enzyme
8.88187	Shared enzyme
8.88187	Shared enzyme
8.88187	Shared enzyme
8.88187	Shared enzyme
8.88187	Shared enzyme
8.88187	Shared enzyme
8.88187	Shared enzyme
8.88187	Shared enzyme
8.88187	Shared enzyme
8.88187	Shared enzyme
8.88187	Shared enzyme
8.88187	Shared enzyme
8.88187	Shared enzyme
8.88187	Shared enzyme
8.88187	Shared enzyme
8.88187	Shared enzyme
0.0110816	Shared enzyme
0.0166223	Shared enzyme
0.0166223	Shared enzyme
0.0221631	Shared enzyme
58.0951	Shared enzyme
58.0951	Shared enzyme
58.0951	Shared enzyme
58.0951	Shared enzyme
0.132979	Shared enzyme
3.59597	Shared enzyme
0.0110816	Shared enzyme
0.0110816	Shared enzyme
0.0110816	Shared enzyme
0.0110816	Shared enzyme
4.41046	Shared enzyme
4.41046	Shared enzyme
4.41046	Shared enzyme
4.41046	Shared enzyme
4.41046	Shared enzyme
4.41046	Shared enzyme
0.0166223	Shared enzyme
0.0166223	Shared enzyme
1.7398	Shared enzyme
0.0221631	Shared enzyme
6.63231	Shared enzyme
0.0110816	Shared enzyme
0.0609486	Shared enzyme
0.0609486	Shared enzyme
0.0609486	Shared enzyme
0.0609486	Shared enzyme
0.0609486	Shared enzyme
0.0609486	Shared enzyme
0.0609486	Shared enzyme
0.0609486	Shared enzyme
0.0609486	Shared enzyme
0.0609486	Shared enzyme
0.0609486	Shared enzyme
0.0609486	Shared enzyme
38.1594	Shared enzyme
38.1594	Shared enzyme
38.1594	Shared enzyme
3.11392	Shared enzyme
38.1594	Shared enzyme
0.0110816	Shared enzyme
0.0110816	Shared enzyme
0.0110816	Shared enzyme
0.0110816	Shared enzyme
0.0110816	Shared enzyme
0.0110816	Shared enzyme
0.0110816	Shared enzyme
0.0110816	Shared enzyme
0.0110816	Shared enzyme
0.0110816	Shared enzyme
0.0110816	Shared enzyme
32.3692	Shared enzyme
32.3692	Shared enzyme
0.0554078	Shared enzyme
0.116356	Shared enzyme
0.116356	Shared enzyme
0.116356	Shared enzyme
0.116356	Shared enzyme
0.116356	Shared enzyme
0.116356	Shared enzyme
0.116356	Shared enzyme
0.116356	Shared enzyme
0.116356	Shared enzyme
0.116356	Shared enzyme
0.116356	Shared enzyme
0.116356	Shared enzyme
0.116356	Shared enzyme
0.116356	Shared enzyme
0.116356	Shared enzyme
0.116356	Shared enzyme
0.116356	Shared enzyme
0.116356	Shared enzyme
0.116356	Shared enzyme
0.116356	Shared enzyme
0.116356	Shared enzyme
0.116356	Shared enzyme
0.116356	Shared enzyme
0.116356	Shared enzyme
0.116356	Shared enzyme
0.116356	Shared enzyme
0.116356	Shared enzyme
0.116356	Shared enzyme
0.116356	Shared enzyme
0.116356	Shared enzyme
0.116356	Shared enzyme
0.116356	Shared enzyme
0.116356	Shared enzyme
0.116356	Shared enzyme
0.116356	Shared enzyme
0.116356	Shared enzyme
0.116356	Shared enzyme
0.116356	Shared enzyme
0.116356	Shared enzyme
0.116356	Shared enzyme
0.116356	Shared enzyme
0.116356	Shared enzyme
0.238254	Shared enzyme
0.238254	Shared enzyme
0.238254	Shared enzyme
0.238254	Shared enzyme
0.0277039	Shared enzyme
0.0277039	Shared enzyme
0.155142	Shared enzyme
0.0166223	Shared enzyme
0.227172	Shared enzyme
0.227172	Shared enzyme
0.227172	Shared enzyme
0.0110816	Shared enzyme
0.0110816	Shared enzyme
0.0110816	Shared enzyme
0.0110816	Shared enzyme
0.0110816	Shared enzyme
0.0110816	Shared enzyme
0.0110816	Shared enzyme
0.0110816	Shared enzyme
0.0110816	Shared enzyme
0.0110816	Shared enzyme
0.0110816	Shared enzyme
0.0110816	Shared enzyme
0.0110816	Shared enzyme
0.0110816	Shared enzyme
0.0110816	Shared enzyme
0.0110816	Shared enzyme
0.0110816	Shared enzyme
0.0110816	Shared enzyme
0.0110816	Shared enzyme
0.0110816	Shared enzyme
0.0110816	Shared enzyme
20.6172	Shared enzyme
20.6172	Shared enzyme
0.0443262	Shared enzyme
0.0443262	Shared enzyme
0.0110816	Shared enzyme
0.0110816	Shared enzyme
0.0110816	Shared enzyme
0.0110816	Shared enzyme
0.321365	Shared enzyme
0.321365	Shared enzyme
0.321365	Shared enzyme
0.321365	Shared enzyme
0.321365	Shared enzyme
0.321365	Shared enzyme
0.5707	Shared enzyme
0.5707	Shared enzyme
0.5707	Shared enzyme
0.0277039	Shared enzyme
0.0277039	Shared enzyme
0.149601	Shared enzyme
0.149601	Shared enzyme
0.149601	Shared enzyme
0.149601	Shared enzyme
0.149601	Shared enzyme
1.57358	Shared enzyme
0.0221631	Shared enzyme
0.49867	Shared enzyme
0.753546	Shared enzyme
0.753546	Shared enzyme
0.753546	Shared enzyme
0.753546	Shared enzyme
0.753546	Shared enzyme
0.753546	Shared enzyme
0.753546	Shared enzyme
0.753546	Shared enzyme
0.753546	Shared enzyme
1.92265	Shared enzyme
1.92265	Shared enzyme
0.371232	Shared enzyme
3.65137	Shared enzyme
1.09707	Shared enzyme
0.0277039	Shared enzyme
0.0110816	Shared enzyme
0.0110816	Shared enzyme
0.0110816	Shared enzyme
0.0110816	Shared enzyme
0.0110816	Shared enzyme
0.0110816	Shared enzyme
0.0110816	Shared enzyme
0.0110816	Shared enzyme
0.0110816	Shared enzyme
0.0110816	Shared enzyme
0.0110816	Shared enzyme
0.0110816	Shared enzyme
0.0110816	Shared enzyme
0.0110816	Shared enzyme
0.0110816	Shared enzyme
0.0110816	Shared enzyme
0.0110816	Shared enzyme
0.0110816	Shared enzyme
0.0110816	Shared enzyme
0.0110816	Shared enzyme
0.0110816	Shared enzyme
0.0110816	Shared enzyme
0.0110816	Shared enzyme
0.0110816	Shared enzyme
0.0110816	Shared enzyme
0.0110816	Shared enzyme
0.0110816	Shared enzyme
0.0110816	Shared enzyme
0.0110816	Shared enzyme
0.0110816	Shared enzyme
0.0110816	Shared enzyme
0.0110816	Shared enzyme
0.0110816	Shared enzyme
0.0110816	Shared enzyme
0.0110816	Shared enzyme
0.0110816	Shared enzyme
0.0110816	Shared enzyme
0.0110816	Shared enzyme
0.326906	Shared enzyme
0.0110816	Shared enzyme
0.0110816	Shared enzyme
0.0110816	Shared enzyme
0.0110816	Shared enzyme
0.0110816	Shared enzyme
0.0110816	Shared enzyme
0.0110816	Shared enzyme
0.0110816	Shared enzyme
0.0110816	Shared enzyme
0.0110816	Shared enzyme
0.0110816	Shared enzyme
0.0110816	Shared enzyme
0.0110816	Shared enzyme
0.0110816	Shared enzyme
0.0110816	Shared enzyme
0.0110816	Shared enzyme
0.0110816	Shared enzyme
0.0110816	Shared enzyme
0.0110816	Shared enzyme
0.0110816	Shared enzyme
0.0110816	Shared enzyme
6.88719	Shared enzyme
6.88719	Shared enzyme
6.88719	Shared enzyme
6.88719	Shared enzyme
6.88719	Shared enzyme
6.88719	Shared enzyme
6.88719	Shared enzyme
6.88719	Shared enzyme
6.88719	Shared enzyme
6.88719	Shared enzyme
6.88719	Shared enzyme
6.88719	Shared enzyme
6.88719	Shared enzyme
6.88719	Shared enzyme
6.88719	Shared enzyme
6.88719	Shared enzyme
6.88719	Shared enzyme
6.88719	Shared enzyme
6.88719	Shared enzyme
6.88719	Shared enzyme
6.88719	Shared enzyme
6.88719	Shared enzyme
6.88719	Shared enzyme
6.88719	Shared enzyme
6.88719	Shared enzyme
6.88719	Shared enzyme
6.88719	Shared enzyme
6.88719	Shared enzyme
6.88719	Shared enzyme
6.88719	Shared enzyme
6.88719	Shared enzyme
6.88719	Shared enzyme
6.88719	Shared enzyme
6.88719	Shared enzyme
6.88719	Shared enzyme
6.88719	Shared enzyme
6.88719	Shared enzyme
6.88719	Shared enzyme
6.88719	Shared enzyme
6.88719	Shared enzyme
6.88719	Shared enzyme
6.88719	Shared enzyme
6.88719	Shared enzyme
6.88719	Shared enzyme
6.88719	Shared enzyme
6.88719	Shared enzyme
6.88719	Shared enzyme
6.88719	Shared enzyme
6.88719	Shared enzyme
6.88719	Shared enzyme
6.88719	Shared enzyme
6.88719	Shared enzyme
6.88719	Shared enzyme
6.88719	Shared enzyme
6.88719	Shared enzyme
6.88719	Shared enzyme
6.88719	Shared enzyme
6.88719	Shared enzyme
6.88719	Shared enzyme
6.88719	Shared enzyme
6.88719	Shared enzyme
6.88719	Shared enzyme
6.88719	Shared enzyme
6.88719	Shared enzyme
6.88719	Shared enzyme
6.88719	Shared enzyme
6.88719	Shared enzyme
6.88719	Shared enzyme
6.88719	Shared enzyme
6.88719	Shared enzyme
6.88719	Shared enzyme
6.88719	Shared enzyme
6.88719	Shared enzyme
6.88719	Shared enzyme
6.88719	Shared enzyme
6.88719	Shared enzyme
6.88719	Shared enzyme
6.88719	Shared enzyme
6.88719	Shared enzyme
6.88719	Shared enzyme
6.88719	Shared enzyme
6.88719	Shared enzyme
6.88719	Shared enzyme
6.88719	Shared enzyme
6.88719	Shared enzyme
6.88719	Shared enzyme
6.88719	Shared enzyme
6.88719	Shared enzyme
6.88719	Shared enzyme
6.88719	Shared enzyme
6.88719	Shared enzyme
6.88719	Shared enzyme
6.88719	Shared enzyme
6.88719	Shared enzyme
6.88719	Shared enzyme
6.88719	Shared enzyme
6.88719	Shared enzyme
6.88719	Shared enzyme
6.88719	Shared enzyme
6.88719	Shared enzyme
6.88719	Shared enzyme
6.88719	Shared enzyme
6.88719	Shared enzyme
6.88719	Shared enzyme
6.88719	Shared enzyme
6.88719	Shared enzyme
6.88719	Shared enzyme
6.88719	Shared enzyme
6.88719	Shared enzyme
6.88719	Shared enzyme
6.88719	Shared enzyme
6.88719	Shared enzyme
6.88719	Shared enzyme
6.88719	Shared enzyme
6.88719	Shared enzyme
6.88719	Shared enzyme
6.88719	Shared enzyme
6.88719	Shared enzyme
6.88719	Shared enzyme
6.88719	Shared enzyme
6.88719	Shared enzyme
6.88719	Shared enzyme
6.88719	Shared enzyme
6.88719	Shared enzyme
6.88719	Shared enzyme
6.88719	Shared enzyme
6.88719	Shared enzyme
6.88719	Shared enzyme
6.88719	Shared enzyme
6.88719	Shared enzyme
6.88719	Shared enzyme
6.88719	Shared enzyme
6.88719	Shared enzyme
6.88719	Shared enzyme
6.88719	Shared enzyme
6.88719	Shared enzyme
6.88719	Shared enzyme
6.88719	Shared enzyme
6.88719	Shared enzyme
6.88719	Shared enzyme
6.88719	Shared enzyme
6.88719	Shared enzyme
6.88719	Shared enzyme
6.88719	Shared enzyme
6.88719	Shared enzyme
6.88719	Shared enzyme
6.88719	Shared enzyme
6.88719	Shared enzyme
6.88719	Shared enzyme
6.88719	Shared enzyme
6.88719	Shared enzyme
6.88719	Shared enzyme
6.88719	Shared enzyme
6.88719	Shared enzyme
6.88719	Shared enzyme
6.88719	Shared enzyme
6.88719	Shared enzyme
6.88719	Shared enzyme
6.88719	Shared enzyme
6.88719	Shared enzyme
6.88719	Shared enzyme
6.88719	Shared enzyme
6.88719	Shared enzyme
6.88719	Shared enzyme
6.88719	Shared enzyme
6.88719	Shared enzyme
6.88719	Shared enzyme
6.88719	Shared enzyme
6.88719	Shared enzyme
6.88719	Shared enzyme
6.88719	Shared enzyme
6.88719	Shared enzyme
6.88719	Shared enzyme
6.88719	Shared enzyme
6.88719	Shared enzyme
6.88719	Shared enzyme
6.88719	Shared enzyme
6.88719	Shared enzyme
6.88719	Shared enzyme
6.88719	Shared enzyme
6.88719	Shared enzyme
6.88719	Shared enzyme
6.88719	Shared enzyme
6.88719	Shared enzyme
6.88719	Shared enzyme
6.88719	Shared enzyme
6.88719	Shared enzyme
6.88719	Shared enzyme
6.88719	Shared enzyme
6.88719	Shared enzyme
6.88719	Shared enzyme
6.88719	Shared enzyme
6.88719	Shared enzyme
6.88719	Shared enzyme
6.88719	Shared enzyme
6.88719	Shared enzyme
6.88719	Shared enzyme
6.88719	Shared enzyme
6.88719	Shared enzyme
6.88719	Shared enzyme
6.88719	Shared enzyme
6.88719	Shared enzyme
6.88719	Shared enzyme
6.88719	Shared enzyme
6.88719	Shared enzyme
6.88719	Shared enzyme
6.88719	Shared enzyme
6.88719	Shared enzyme
6.88719	Shared enzyme
6.88719	Shared enzyme
6.88719	Shared enzyme
6.88719	Shared enzyme
6.88719	Shared enzyme
6.88719	Shared enzyme
6.88719	Shared enzyme
6.88719	Shared enzyme
6.88719	Shared enzyme
6.88719	Shared enzyme
6.88719	Shared enzyme
6.88719	Shared enzyme
6.88719	Shared enzyme
6.88719	Shared enzyme
6.88719	Shared enzyme
6.88719	Shared enzyme
6.88719	Shared enzyme
6.88719	Shared enzyme
6.88719	Shared enzyme
6.88719	Shared enzyme
6.88719	Shared enzyme
6.88719	Shared enzyme
6.88719	Shared enzyme
6.88719	Shared enzyme
6.88719	Shared enzyme
6.88719	Shared enzyme
6.88719	Shared enzyme
6.88719	Shared enzyme
6.88719	Shared enzyme
6.88719	Shared enzyme
6.88719	Shared enzyme
6.88719	Shared enzyme
6.88719	Shared enzyme
6.88719	Shared enzyme
6.88719	Shared enzyme
6.88719	Shared enzyme
6.88719	Shared enzyme
6.88719	Shared enzyme
6.88719	Shared enzyme
6.88719	Shared enzyme
6.88719	Shared enzyme
6.88719	Shared enzyme
6.88719	Shared enzyme
6.88719	Shared enzyme
6.88719	Shared enzyme
6.88719	Shared enzyme
6.88719	Shared enzyme
6.88719	Shared enzyme
6.88719	Shared enzyme
6.88719	Shared enzyme
0.205009	Shared enzyme
3.60705	Shared enzyme
9.12012	Shared enzyme
9.12012	Shared enzyme
9.12012	Shared enzyme
9.12012	Shared enzyme
9.12012	Shared enzyme
9.12012	Shared enzyme
9.12012	Shared enzyme
9.12012	Shared enzyme
9.12012	Shared enzyme
9.12012	Shared enzyme
9.12012	Shared enzyme
9.12012	Shared enzyme
9.12012	Shared enzyme
9.12012	Shared enzyme
9.12012	Shared enzyme
9.12012	Shared enzyme
9.12012	Shared enzyme
9.12012	Shared enzyme
9.12012	Shared enzyme
9.12012	Shared enzyme
9.12012	Shared enzyme
9.12012	Shared enzyme
9.12012	Shared enzyme
9.12012	Shared enzyme
9.12012	Shared enzyme
9.12012	Shared enzyme
9.12012	Shared enzyme
9.12012	Shared enzyme
9.12012	Shared enzyme
9.12012	Shared enzyme
9.12012	Shared enzyme
9.12012	Shared enzyme
9.12012	Shared enzyme
9.12012	Shared enzyme
9.12012	Shared enzyme
9.12012	Shared enzyme
9.12012	Shared enzyme
9.12012	Shared enzyme
9.12012	Shared enzyme
9.12012	Shared enzyme
9.12012	Shared enzyme
9.12012	Shared enzyme
9.12012	Shared enzyme
9.12012	Shared enzyme
9.12012	Shared enzyme
9.12012	Shared enzyme
9.12012	Shared enzyme
9.12012	Shared enzyme
9.12012	Shared enzyme
9.12012	Shared enzyme
9.12012	Shared enzyme
9.12012	Shared enzyme
9.12012	Shared enzyme
9.12012	Shared enzyme
9.12012	Shared enzyme
9.12012	Shared enzyme
9.12012	Shared enzyme
9.12012	Shared enzyme
9.21986	Shared enzyme
9.12012	Shared enzyme
9.12012	Shared enzyme
9.12012	Shared enzyme
9.12012	Shared enzyme
9.12012	Shared enzyme
9.12012	Shared enzyme
9.12012	Shared enzyme
9.12012	Shared enzyme
9.12012	Shared enzyme
9.12012	Shared enzyme
9.12012	Shared enzyme
9.12012	Shared enzyme
9.12012	Shared enzyme
9.12012	Shared enzyme
9.12012	Shared enzyme
9.12012	Shared enzyme
9.12012	Shared enzyme
9.12012	Shared enzyme
9.12012	Shared enzyme
9.12012	Shared enzyme
9.12012	Shared enzyme
9.12012	Shared enzyme
9.12012	Shared enzyme
9.12012	Shared enzyme
9.12012	Shared enzyme
9.12012	Shared enzyme
9.12012	Shared enzyme
9.12012	Shared enzyme
9.12012	Shared enzyme
9.12012	Shared enzyme
9.12012	Shared enzyme
9.12012	Shared enzyme
9.12012	Shared enzyme
9.12012	Shared enzyme
9.12012	Shared enzyme
9.12012	Shared enzyme
9.12012	Shared enzyme
9.12012	Shared enzyme
9.12012	Shared enzyme
9.12012	Shared enzyme
9.12012	Shared enzyme
9.12012	Shared enzyme
9.12012	Shared enzyme
9.12012	Shared enzyme
9.12012	Shared enzyme
9.12012	Shared enzyme
9.12012	Shared enzyme
9.12012	Shared enzyme
9.12012	Shared enzyme
9.12012	Shared enzyme
9.12012	Shared enzyme
9.12012	Shared enzyme
9.12012	Shared enzyme
9.12012	Shared enzyme
9.12012	Shared enzyme
9.12012	Shared enzyme
9.12012	Shared enzyme
9.12012	Shared enzyme
9.12012	Shared enzyme
9.12012	Shared enzyme
9.12012	Shared enzyme
9.12012	Shared enzyme
9.12012	Shared enzyme
9.12012	Shared enzyme
9.12012	Shared enzyme
9.12012	Shared enzyme
9.12012	Shared enzyme
9.12012	Shared enzyme
9.12012	Shared enzyme
9.12012	Shared enzyme
9.12012	Shared enzyme
9.12012	Shared enzyme
9.12012	Shared enzyme
9.12012	Shared enzyme
9.12012	Shared enzyme
9.12012	Shared enzyme
9.12012	Shared enzyme
9.12012	Shared enzyme
9.12012	Shared enzyme
9.12012	Shared enzyme
9.12012	Shared enzyme
9.12012	Shared enzyme
9.12012	Shared enzyme
9.12012	Shared enzyme
9.12012	Shared enzyme
9.12012	Shared enzyme
9.12012	Shared enzyme
9.12012	Shared enzyme
9.12012	Shared enzyme
9.12012	Shared enzyme
9.12012	Shared enzyme
9.12012	Shared enzyme
9.12012	Shared enzyme
9.12012	Shared enzyme
9.12012	Shared enzyme
9.12012	Shared enzyme
9.12012	Shared enzyme
9.12012	Shared enzyme
9.12012	Shared enzyme
9.12012	Shared enzyme
9.12012	Shared enzyme
9.12012	Shared enzyme
9.12012	Shared enzyme
9.12012	Shared enzyme
9.12012	Shared enzyme
9.12012	Shared enzyme
9.12012	Shared enzyme
9.12012	Shared enzyme
9.12012	Shared enzyme
9.12012	Shared enzyme
9.12012	Shared enzyme
9.12012	Shared enzyme
9.12012	Shared enzyme
9.12012	Shared enzyme
9.12012	Shared enzyme
9.12012	Shared enzyme
9.12012	Shared enzyme
9.12012	Shared enzyme
9.12012	Shared enzyme
9.12012	Shared enzyme
9.12012	Shared enzyme
9.12012	Shared enzyme
9.12012	Shared enzyme
9.12012	Shared enzyme
9.12012	Shared enzyme
9.12012	Shared enzyme
9.12012	Shared enzyme
9.12012	Shared enzyme
9.12012	Shared enzyme
9.12012	Shared enzyme
9.12012	Shared enzyme
9.12012	Shared enzyme
9.12012	Shared enzyme
9.12012	Shared enzyme
9.12012	Shared enzyme
9.12012	Shared enzyme
9.12012	Shared enzyme
9.12012	Shared enzyme
9.12012	Shared enzyme
9.12012	Shared enzyme
9.12012	Shared enzyme
9.12012	Shared enzyme
9.12012	Shared enzyme
9.12012	Shared enzyme
9.12012	Shared enzyme
9.12012	Shared enzyme
9.12012	Shared enzyme
9.12012	Shared enzyme
0.0110816	Shared enzyme
0.0110816	Shared enzyme
0.0110816	Shared enzyme
0.0110816	Shared enzyme
0.0110816	Shared enzyme
0.0221631	Shared enzyme
0.13852	Shared enzyme
72.1742	Shared enzyme
72.1742	Shared enzyme
0.0166223	Shared enzyme
0.509752	Shared enzyme
0.0775709	Shared enzyme
0.0775709	Shared enzyme
0.0664894	Shared enzyme
40.83	Shared enzyme
0.0775709	Shared enzyme
0.0664894	Shared enzyme
0.0110816	Shared enzyme
0.0277039	Shared enzyme
0.0277039	Shared enzyme
0.0277039	Shared enzyme
0.0277039	Shared enzyme
3.48515	Shared enzyme
76.6844	Shared enzyme
0.0831117	Shared enzyme
0.0831117	Shared enzyme
0.0831117	Shared enzyme
0.0831117	Shared enzyme
0.0831117	Shared enzyme
0.0221631	Shared enzyme
2.24956	Shared enzyme
2.50997	Shared enzyme
2.24956	Shared enzyme
2.50997	Shared enzyme
0.0277039	Shared enzyme
0.0110816	Shared enzyme
0.0387855	Shared enzyme
0.0387855	Shared enzyme
0.0387855	Shared enzyme
0.0387855	Shared enzyme
0.0387855	Shared enzyme
0.0387855	Shared enzyme
0.0387855	Shared enzyme
0.0387855	Shared enzyme
0.0387855	Shared enzyme
0.0387855	Shared enzyme
0.0387855	Shared enzyme
0.0387855	Shared enzyme
0.0387855	Shared enzyme
0.0387855	Shared enzyme
0.0387855	Shared enzyme
0.0387855	Shared enzyme
0.0387855	Shared enzyme
0.0387855	Shared enzyme
0.0387855	Shared enzyme
0.0387855	Shared enzyme
0.0387855	Shared enzyme
0.0387855	Shared enzyme
0.0110816	Shared enzyme
0.0110816	Shared enzyme
0.0110816	Shared enzyme
50.6427	Shared enzyme
0.0387855	Shared enzyme
0.0110816	Shared enzyme
0.0110816	Shared enzyme
0.0110816	Shared enzyme
2.77593	Shared enzyme
0.160683	Shared enzyme
0.0166223	Shared enzyme
0.0166223	Shared enzyme
0.0886525	Shared enzyme
0.0609486	Shared enzyme
0.0609486	Shared enzyme
0.0609486	Shared enzyme
0.0609486	Shared enzyme
0.0609486	Shared enzyme
0.0609486	Shared enzyme
0.0609486	Shared enzyme
0.0609486	Shared enzyme
0.0609486	Shared enzyme
0.0609486	Shared enzyme
0.0609486	Shared enzyme
0.0609486	Shared enzyme
0.288121	Shared enzyme
0.0221631	Shared enzyme
0.0221631	Shared enzyme
0.0221631	Shared enzyme
0.0221631	Shared enzyme
0.0221631	Shared enzyme
0.0221631	Shared enzyme
0.0221631	Shared enzyme
0.0221631	Shared enzyme
0.0221631	Shared enzyme
0.0221631	Shared enzyme
0.0221631	Shared enzyme
0.0221631	Shared enzyme
0.0221631	Shared enzyme
0.0221631	Shared enzyme
0.0221631	Shared enzyme
0.0221631	Shared enzyme
0.0221631	Shared enzyme
0.0221631	Shared enzyme
0.0221631	Shared enzyme
0.0221631	Shared enzyme
0.0221631	Shared enzyme
0.0221631	Shared enzyme
0.0221631	Shared enzyme
0.0110816	Shared enzyme
55.2028	Shared enzyme
55.2028	Shared enzyme
55.2028	Shared enzyme
0.0221631	Shared enzyme
55.2028	Shared enzyme
0.0221631	Shared enzyme
0.0221631	Shared enzyme
0.0221631	Shared enzyme
0.0221631	Shared enzyme
0.0221631	Shared enzyme
55.2028	Shared enzyme
55.2028	Shared enzyme
55.2028	Shared enzyme
0.958555	Shared enzyme
0.958555	Shared enzyme
0.958555	Shared enzyme
0.958555	Shared enzyme
0.958555	Shared enzyme
0.193927	Shared enzyme
0.260417	Shared enzyme
0.160683	Shared enzyme
0.160683	Shared enzyme
52.5654	Shared enzyme
52.5654	Shared enzyme
52.5654	Shared enzyme
52.5654	Shared enzyme
52.5654	Shared enzyme
52.5654	Shared enzyme
52.5654	Shared enzyme
52.5654	Shared enzyme
52.5654	Shared enzyme
52.5654	Shared enzyme
52.5654	Shared enzyme
52.5654	Shared enzyme
0.0166223	Shared enzyme
0.0110816	Shared enzyme
26.6179	Shared enzyme
0.0110816	Shared enzyme
0.0110816	Shared enzyme
0.0110816	Shared enzyme
0.0110816	Shared enzyme
0.0110816	Shared enzyme
0.0110816	Shared enzyme
0.0110816	Shared enzyme
0.0110816	Shared enzyme
16.1458	Shared enzyme
16.1458	Shared enzyme
16.1458	Shared enzyme
16.1458	Shared enzyme
16.1458	Shared enzyme
16.1458	Shared enzyme
16.1458	Shared enzyme
0.0221631	Shared enzyme
0.0221631	Shared enzyme
0.0221631	Shared enzyme
0.0221631	Shared enzyme
0.0332447	Shared enzyme
0.0332447	Shared enzyme
0.0332447	Shared enzyme
43.1017	Shared enzyme
0.892066	Shared enzyme
0.892066	Shared enzyme
0.892066	Shared enzyme
0.892066	Shared enzyme
0.892066	Shared enzyme
35.8488	Shared enzyme
35.8488	Shared enzyme
0.892066	Shared enzyme
0.892066	Shared enzyme
35.8488	Shared enzyme
0.892066	Shared enzyme
0.0332447	Shared enzyme
0.0332447	Shared enzyme
0.0332447	Shared enzyme
0.0332447	Shared enzyme
0.0332447	Shared enzyme
0.0332447	Shared enzyme
0.0332447	Shared enzyme
18.4342	Shared enzyme
18.4342	Shared enzyme
18.4342	Shared enzyme
18.4342	Shared enzyme
18.4342	Shared enzyme
18.4342	Shared enzyme
0.171764	Shared enzyme
0.254876	Shared enzyme
0.254876	Shared enzyme
0.254876	Shared enzyme
0.254876	Shared enzyme
0.254876	Shared enzyme
0.254876	Shared enzyme
0.254876	Shared enzyme
0.254876	Shared enzyme
0.326906	Shared enzyme
0.0609486	Shared enzyme
0.0609486	Shared enzyme
0.326906	Shared enzyme
49.2243	Shared enzyme
24.3573	Shared enzyme
24.3573	Shared enzyme
24.3573	Shared enzyme
24.3573	Shared enzyme
24.3573	Shared enzyme
0.0110816	Shared enzyme
0.0221631	Shared enzyme
0.0110816	Shared enzyme
0.0110816	Shared enzyme
0.0110816	Shared enzyme
0.0110816	Shared enzyme
0.0110816	Shared enzyme
21.1325	Shared enzyme
0.105275	Shared enzyme
0.254876	Shared enzyme
0.127438	Shared enzyme
5.08644	Shared enzyme
0.127438	Shared enzyme
0.127438	Shared enzyme
0.127438	Shared enzyme
0.127438	Shared enzyme
0.127438	Shared enzyme
2.36037	Shared enzyme
0.0941933	Shared enzyme
0.0941933	Shared enzyme
0.0941933	Shared enzyme
0.0941933	Shared enzyme
0.0941933	Shared enzyme
0.0941933	Shared enzyme
0.0941933	Shared enzyme
0.0941933	Shared enzyme
0.0941933	Shared enzyme
0.0941933	Shared enzyme
0.0941933	Shared enzyme
0.0941933	Shared enzyme
0.0941933	Shared enzyme
0.0941933	Shared enzyme
0.0941933	Shared enzyme
11.4473	Shared enzyme
11.4473	Shared enzyme
11.4473	Shared enzyme
11.4473	Shared enzyme
11.4473	Shared enzyme
11.4473	Shared enzyme
11.4473	Shared enzyme
11.4473	Shared enzyme
11.4473	Shared enzyme
0.0166223	Shared enzyme
0.0166223	Shared enzyme
0.0831117	Shared enzyme
0.0831117	Shared enzyme
0.0831117	Shared enzyme
0.0831117	Shared enzyme
0.0831117	Shared enzyme
0.0831117	Shared enzyme
0.0831117	Shared enzyme
0.0831117	Shared enzyme
0.0831117	Shared enzyme
0.0831117	Shared enzyme
7.92886	Shared enzyme
7.92886	Shared enzyme
0.0110816	Shared enzyme
28.3134	Shared enzyme
28.3134	Shared enzyme
28.3134	Shared enzyme
28.3134	Shared enzyme
28.3134	Shared enzyme
28.3134	Shared enzyme
28.3134	Shared enzyme
28.3134	Shared enzyme
28.3134	Shared enzyme
28.3134	Shared enzyme
28.3134	Shared enzyme
28.3134	Shared enzyme
28.3134	Shared enzyme
28.3134	Shared enzyme
28.3134	Shared enzyme
28.3134	Shared enzyme
28.3134	Shared enzyme
28.3134	Shared enzyme
28.3134	Shared enzyme
28.3134	Shared enzyme
28.3134	Shared enzyme
28.3134	Shared enzyme
28.3134	Shared enzyme
28.3134	Shared enzyme
28.3134	Shared enzyme
28.3134	Shared enzyme
28.3134	Shared enzyme
28.3134	Shared enzyme
28.3134	Shared enzyme
28.3134	Shared enzyme
28.3134	Shared enzyme
28.3134	Shared enzyme
0.615027	Shared enzyme
0.615027	Shared enzyme
0.615027	Shared enzyme
0.615027	Shared enzyme
0.099734	Shared enzyme
0.099734	Shared enzyme
0.099734	Shared enzyme
0.099734	Shared enzyme
0.099734	Shared enzyme
0.099734	Shared enzyme
0.099734	Shared enzyme
0.099734	Shared enzyme
0.099734	Shared enzyme
0.099734	Shared enzyme
0.099734	Shared enzyme
0.099734	Shared enzyme
0.099734	Shared enzyme
0.099734	Shared enzyme
0.099734	Shared enzyme
0.099734	Shared enzyme
0.099734	Shared enzyme
0.099734	Shared enzyme
0.099734	Shared enzyme
0.099734	Shared enzyme
0.099734	Shared enzyme
0.099734	Shared enzyme
0.099734	Shared enzyme
0.099734	Shared enzyme
0.099734	Shared enzyme
0.099734	Shared enzyme
0.099734	Shared enzyme
0.099734	Shared enzyme
0.099734	Shared enzyme
0.099734	Shared enzyme
0.099734	Shared enzyme
0.099734	Shared enzyme
0.099734	Shared enzyme
0.099734	Shared enzyme
0.099734	Shared enzyme
0.099734	Shared enzyme
0.099734	Shared enzyme
0.099734	Shared enzyme
0.099734	Shared enzyme
0.099734	Shared enzyme
0.099734	Shared enzyme
0.099734	Shared enzyme
0.099734	Shared enzyme
0.099734	Shared enzyme
0.099734	Shared enzyme
0.099734	Shared enzyme
0.099734	Shared enzyme
0.099734	Shared enzyme
0.099734	Shared enzyme
0.099734	Shared enzyme
0.099734	Shared enzyme
0.099734	Shared enzyme
0.099734	Shared enzyme
0.099734	Shared enzyme
0.099734	Shared enzyme
0.099734	Shared enzyme
0.099734	Shared enzyme
0.099734	Shared enzyme
0.099734	Shared enzyme
0.099734	Shared enzyme
0.099734	Shared enzyme
0.099734	Shared enzyme
0.099734	Shared enzyme
0.099734	Shared enzyme
0.099734	Shared enzyme
0.099734	Shared enzyme
0.099734	Shared enzyme
0.099734	Shared enzyme
0.099734	Shared enzyme
0.099734	Shared enzyme
0.099734	Shared enzyme
0.099734	Shared enzyme
0.099734	Shared enzyme
0.099734	Shared enzyme
0.099734	Shared enzyme
0.099734	Shared enzyme
0.099734	Shared enzyme
0.099734	Shared enzyme
0.099734	Shared enzyme
0.099734	Shared enzyme
0.099734	Shared enzyme
0.099734	Shared enzyme
0.099734	Shared enzyme
0.099734	Shared enzyme
0.099734	Shared enzyme
0.099734	Shared enzyme
0.099734	Shared enzyme
0.099734	Shared enzyme
0.099734	Shared enzyme
0.099734	Shared enzyme
0.099734	Shared enzyme
0.099734	Shared enzyme
0.099734	Shared enzyme
0.099734	Shared enzyme
0.099734	Shared enzyme
0.099734	Shared enzyme
0.099734	Shared enzyme
0.099734	Shared enzyme
0.099734	Shared enzyme
0.099734	Shared enzyme
0.099734	Shared enzyme
0.099734	Shared enzyme
0.099734	Shared enzyme
0.099734	Shared enzyme
0.099734	Shared enzyme
0.099734	Shared enzyme
0.099734	Shared enzyme
0.099734	Shared enzyme
0.099734	Shared enzyme
0.099734	Shared enzyme
0.0221631	Shared enzyme
0.0221631	Shared enzyme
0.0221631	Shared enzyme
0.0221631	Shared enzyme
0.0221631	Shared enzyme
0.0221631	Shared enzyme
0.0221631	Shared enzyme
0.0221631	Shared enzyme
0.0221631	Shared enzyme
0.0221631	Shared enzyme
0.0221631	Shared enzyme
0.0221631	Shared enzyme
0.0221631	Shared enzyme
0.0221631	Shared enzyme
0.0221631	Shared enzyme
0.0221631	Shared enzyme
0.0221631	Shared enzyme
0.0221631	Shared enzyme
0.0221631	Shared enzyme
0.0221631	Shared enzyme
0.0221631	Shared enzyme
0.0221631	Shared enzyme
0.0221631	Shared enzyme
0.0221631	Shared enzyme
0.0221631	Shared enzyme
0.0221631	Shared enzyme
0.0221631	Shared enzyme
0.0221631	Shared enzyme
0.0221631	Shared enzyme
0.0221631	Shared enzyme
0.0221631	Shared enzyme
0.0221631	Shared enzyme
0.0221631	Shared enzyme
0.0221631	Shared enzyme
0.0221631	Shared enzyme
0.0221631	Shared enzyme
0.0221631	Shared enzyme
0.0221631	Shared enzyme
0.0221631	Shared enzyme
0.0221631	Shared enzyme
0.0221631	Shared enzyme
0.0221631	Shared enzyme
0.0609486	Shared enzyme
0.0609486	Shared enzyme
0.0609486	Shared enzyme
0.0609486	Shared enzyme
0.0609486	Shared enzyme
0.0609486	Shared enzyme
0.0609486	Shared enzyme
0.0609486	Shared enzyme
0.0609486	Shared enzyme
0.0609486	Shared enzyme
0.0609486	Shared enzyme
0.0609486	Shared enzyme
0.0609486	Shared enzyme
[truncated: 66,559 more rows]

## Sheet: Figure 3B
pid1	pid2	protein identity	rxn1	rxn2	euc distance
UNIPROT:Q44258	UNIPROT:P08078	0.168766	RXN-10423	RXN-11099	0.890581
UNIPROT:Q44258	UNIPROT:P31112	0.204545	RXN-10423	RXN-11458	0.882078
UNIPROT:Q44258	UNIPROT:P31114	0.156566	RXN-10423	RXN-11458	0.882078
UNIPROT:Q44258	UNIPROT:Q50751	0.115	RXN-10423	RXN-18273	0.882473
UNIPROT:Q44258	UNIPROT:W8X5J9	0.192893	RXN-10423	RXN-20145	0.880804
UNIPROT:Q44258	UNIPROT:P0A395	0.180905	RXN-10423	RXN-14860	0.171882
UNIPROT:Q44258	UNIPROT:Q9AJU2	0.13217	RXN-10423	RXN-15405	0.887065
UNIPROT:Q44258	UNIPROT:Q7BUE1	0.2075	RXN-10423	RXN-9578	0.317159
UNIPROT:Q44258	UNIPROT:Q9ALN2	0.132353	RXN-10423	RXN-13632	0.890278
UNIPROT:Q44258	UNIPROT:B5L3X1	0.16962	RXN-10423	RXN-14557	0.880106
UNIPROT:Q44258	UNIPROT:A0QXD8	0.157895	RXN-10423	RXN-17764	0.0828974
UNIPROT:Q44258	UNIPROT:Q5V468	0.163814	RXN-10423	RXN-12168	0.881714
UNIPROT:Q44258	UNIPROT:H2IFX0	0.14787	RXN-10423	RXN-15893	0.880226
UNIPROT:Q44258	UNIPROT:Q5LLW6	0.224747	RXN-10423	RXN-16010	0.879075
UNIPROT:Q44258	UNIPROT:P70473	0.153465	RXN-10423	RXN-9797	0.899168
UNIPROT:Q44258	UNIPROT:Q2MF63	0.156962	RXN-10423	RXN-13209	0.883226
UNIPROT:Q44258	UNIPROT:Q59523	0.128713	RXN-10423	RXN-15050	0.604438
UNIPROT:Q44258	UNIPROT:V5TDY7	0.187342	RXN-10423	RXN-19276	0.88074
UNIPROT:Q44258	UNIPROT:P14168	0.214106	RXN-10423	RXN-9159	0.321499
UNIPROT:Q44258	UNIPROT:Q04809	0.193955	RXN-10423	RXN-5041	0.118247
UNIPROT:Q44258	UNIPROT:Q97YM2	0.179293	RXN-10423	RXN-8776	0.110875
UNIPROT:Q44258	UNIPROT:Q88J56	0.166253	RXN-10423	RXN-19190	0.879365
UNIPROT:Q44258	UNIPROT:Q46N54	0.20403	RXN-10423	RXN-11728	0.108929
UNIPROT:Q44258	UNIPROT:P18623	0.20403	RXN-10423	VIOMYCIN-KINASE-RXN	0.880003
UNIPROT:Q44258	UNIPROT:Q5VJ89	0.142857	RXN-10423	RXN-8697	0.126162
UNIPROT:Q44258	UNIPROT:P22441	0.201511	RXN-10423	N-ACYLMANNOSAMINE-1-DEHYDROGENASE-RXN	0.0689277
UNIPROT:Q44258	UNIPROT:Q8NMA4	0.199495	RXN-10423	ACETOINDEHYDROG-RXN	0.0860234
UNIPROT:Q44258	UNIPROT:Q9LBG2	0.231738	RXN-10423	RXN-19806	0.0560745
UNIPROT:Q44258	UNIPROT:Q59111	0.173804	RXN-10423	RXN-1082	0.88341
UNIPROT:Q44258	UNIPROT:Q59112	0.20403	RXN-10423	RXN-1082	0.88341
UNIPROT:Q44258	UNIPROT:P26172	0.133995	RXN-10423	RXN-17427	0.851904
UNIPROT:Q44258	UNIPROT:B2J4A4	0.173804	RXN-10423	RXN-12824	0.876903
UNIPROT:Q44258	UNIPROT:Q58379	0.178841	RXN-10423	RXN-11782	0.893094
UNIPROT:Q44258	UNIPROT:Q2FUB2	0.189873	RXN-10423	RXN-11782	0.893094
UNIPROT:Q44258	UNIPROT:Q5JHF1	0.227273	RXN-10423	RXN-11782	0.893094
UNIPROT:Q44258	UNIPROT:Q939Q3	0.209596	RXN-10423	RXN-16566	0.328299
UNIPROT:Q44258	UNIPROT:Q9RFR0	0.141119	RXN-10423	RXN-8849	0.885045
UNIPROT:Q44258	UNIPROT:F1CWE5	0.205063	RXN-10423	RXN-16588	0.878131
UNIPROT:Q44258	UNIPROT:P16689	0.155779	RXN-10423	RXN-17955	0.88751
UNIPROT:Q44258	UNIPROT:V5TDH1	0.166247	RXN-10423	RXN-19287	0.878988
UNIPROT:Q44258	UNIPROT:P76472	0.2267	RXN-10423	RXN0-5409	0.884749
UNIPROT:Q44258	UNIPROT:Q9Z9I9	0.174684	RXN-10423	RXN-10896	0.878366
UNIPROT:Q44258	UNIPROT:Q56863	0.201005	RXN-10423	RXN-21377	0.326714
UNIPROT:Q44258	UNIPROT:B1W019	0.156171	RXN-10423	RXN-12774	0.877355
UNIPROT:Q44258	UNIPROT:Q0ZQ43	0.214106	RXN-10423	RXN-15080	0.889184
UNIPROT:Q44258	UNIPROT:E7BBN5	0.18593	RXN-10423	RXN-18505	0.895081
UNIPROT:Q44258	UNIPROT:Q9RA05	0.221662	RXN-10423	RXN-9401	0.878303
UNIPROT:Q44258	UNIPROT:A0A348BF02	0.114713	RXN-10423	RXN-20901	0.873684
UNIPROT:Q44258	UNIPROT:Q715L4	0.191919	RXN-10423	PHLORETIN-HYDROLASE-RXN	0.87915
UNIPROT:Q44258	UNIPROT:L7RFF8	0.118812	RXN-10423	RXN-20921	0.886113
UNIPROT:Q44258	UNIPROT:L7VFM4	0.201511	RXN-10423	RXN-15576	0.880465
UNIPROT:Q44258	UNIPROT:A0A0H3PBA7	0.15	RXN-10423	RXN-16162	0.374239
UNIPROT:Q44258	UNIPROT:Q9EX73	0.219144	RXN-10423	RXN-9432	0.884988
UNIPROT:Q44258	UNIPROT:C7PLV2	0.186398	RXN-10423	RXN-11906	0.876999
UNIPROT:Q44258	UNIPROT:M1VDX3	0.176322	RXN-10423	RXN-15708	0.873926
UNIPROT:Q44258	UNIPROT:Q92CR1	0.227273	RXN-10423	RXN-19372	0.886711
UNIPROT:Q44258	UNIPROT:D7PHZ7	0.203046	RXN-10423	RXN-16581	0.891643
UNIPROT:Q44258	UNIPROT:E3PY99	0.1725	RXN-10423	RXN-18500	0.121561
UNIPROT:Q44258	UNIPROT:Q9ZET3	0.173804	RXN-10423	RXN-17588	0.0891237
UNIPROT:Q44258	UNIPROT:Q8RR26	0.2	RXN-10423	RXN-21004	0.882972
UNIPROT:Q44258	UNIPROT:Q8RR28	0.204545	RXN-10423	RXN-21004	0.882972
UNIPROT:Q44258	UNIPROT:Q8KN33	0.183879	RXN-10423	RXN0-7010	0.885508
UNIPROT:Q44258	UNIPROT:P42620	0.164141	RXN-10423	RXN0-7010	0.885508
UNIPROT:Q44258	UNIPROT:D2KTX1	0.227848	RXN-10423	RXN-17143	0.0985926
UNIPROT:Q44258	UNIPROT:Q2LXU6	0.183879	RXN-10423	4.2.1.100-RXN	0.877423
UNIPROT:Q44258	UNIPROT:O87873	0.209068	RXN-10423	4.2.1.100-RXN	0.877423
UNIPROT:Q44258	UNIPROT:A0A0H5BN57	0.21608	RXN-10423	RXN-18984	0.877111
UNIPROT:Q44258	UNIPROT:A0A0H5BN61	0.200501	RXN-10423	RXN-18984	0.877111
UNIPROT:Q44258	UNIPROT:Q88JX9	0.245333	RXN-10423	RXN-2464	0.885736
UNIPROT:Q44258	UNIPROT:Q9AQI0	0.216625	RXN-10423	RXN-2464	0.885736
UNIPROT:Q44258	UNIPROT:P40011	0.205063	RXN-10423	RXN-2464	0.885736
UNIPROT:Q44258	UNIPROT:A5W059	0.212121	RXN-10423	RXN-2464	0.885736
UNIPROT:Q44258	UNIPROT:Q9KBI9	0.207595	RXN-10423	RXN-2464	0.885736
UNIPROT:Q44258	UNIPROT:Q194Q5	0.207071	RXN-10423	RXN-12932	0.338166
UNIPROT:Q44258	UNIPROT:O24721	0.138958	RXN-10423	1.13.11.38-RXN	0.881737
UNIPROT:Q44258	UNIPROT:B0FXI4	0.221354	RXN-10423	RXN-3941	0.221605
UNIPROT:Q44258	UNIPROT:A0A0A1GNF2	0.221374	RXN-10423	RXN-16711	0.88355
UNIPROT:Q44258	UNIPROT:P22868	0.168766	RXN-10423	METHANE-MONOOXYGENASE-RXN	0.114748
UNIPROT:Q44258	UNIPROT:Q53563	0.179293	RXN-10423	METHANE-MONOOXYGENASE-RXN	0.114748
UNIPROT:Q44258	UNIPROT:P27354	0.126551	RXN-10423	METHANE-MONOOXYGENASE-RXN	0.114748
UNIPROT:Q44258	UNIPROT:P18798	0.124688	RXN-10423	METHANE-MONOOXYGENASE-RXN	0.114748
UNIPROT:Q44258	UNIPROT:Q8G9L1	0.142857	RXN-10423	RXN-10123	0.882989
UNIPROT:Q44258	UNIPROT:Q9AH03	0.194444	RXN-10423	RXN-16305	0.871269
UNIPROT:Q44258	UNIPROT:Q2VEQ7	0.225316	RXN-10423	1.1.1.272-RXN	0.124257
UNIPROT:Q44258	UNIPROT:G5CN54	0.20403	RXN-10423	RXN-14019	0.570906
UNIPROT:Q44258	UNIPROT:O24963	0.197468	RXN-10423	RXN-10622	0.869906
UNIPROT:Q44258	UNIPROT:Q9KXN1	0.207161	RXN-10423	RXN-10622	0.869906
UNIPROT:Q44258	UNIPROT:A9CEQ8	0.142857	RXN-10423	RXN-15907	0.881144
UNIPROT:Q44258	UNIPROT:Q9L4X0	0.142857	RXN-10423	RXN-16254	0.368179
UNIPROT:Q44258	UNIPROT:D2Z024	0.209068	RXN-10423	RXN-12537	0.881283
UNIPROT:Q44258	UNIPROT:Q54528	0.179293	RXN-10423	RXN-14863	0.881681
UNIPROT:Q44258	UNIPROT:P95137	0.201005	RXN-10423	RXN-17284	0.889603
UNIPROT:Q44258	UNIPROT:I6X9J4	0.218274	RXN-10423	1.13.11.14-RXN	0.886799
UNIPROT:Q44258	UNIPROT:Q51976	0.189873	RXN-10423	1.13.11.14-RXN	0.886799
UNIPROT:Q44258	UNIPROT:Q51718	0.201511	RXN-10423	3.1.1.76-RXN	0.899168
UNIPROT:Q44258	UNIPROT:Q8KQ22	0.183417	RXN-10423	3.1.1.76-RXN	0.899168
UNIPROT:Q44258	UNIPROT:Q643C1	0.178841	RXN-10423	RXN-14541	0.887333
UNIPROT:Q44258	PID:BAV89210	0.20403	RXN-10423	RXN0-5180	0.878802
UNIPROT:Q44258	UNIPROT:Q948Q0	0.18136	RXN-10423	RXN0-5180	0.878802
UNIPROT:Q44258	UNIPROT:E2GIN1	0.183879	RXN-10423	RXN-13635	0.884791
UNIPROT:Q44258	UNIPROT:C9K1X5	0.18136	RXN-10423	RXN-15429	0.87216
UNIPROT:Q44258	UNIPROT:P07639	0.173367	RXN-10423	RXN-20673	0.880703
UNIPROT:Q44258	UNIPROT:P39644	0.221662	RXN-10423	RXN-16298	0.121561
UNIPROT:Q44258	UNIPROT:F2RB78	0.21608	RXN-10423	RXN-20193	0.150804
UNIPROT:Q44258	UNIPROT:Q53U11	0.18	RXN-10423	RXN-13176	0.882663
UNIPROT:Q44258	UNIPROT:P29379	0.224806	RXN-10423	R310-RXN	0.894395
UNIPROT:Q44258	UNIPROT:Q53117	0.227273	RXN-10423	R310-RXN	0.894395
UNIPROT:Q44258	UNIPROT:P21220	0.183463	RXN-10423	R310-RXN	0.894395
UNIPROT:Q44258	UNIPROT:P97052	0.196474	RXN-10423	R310-RXN	0.894395
UNIPROT:Q44258	UNIPROT:P27763	0.217391	RXN-10423	R310-RXN	0.894395
UNIPROT:Q44258	UNIPROT:P97051	0.206549	RXN-10423	R310-RXN	0.894395
UNIPROT:Q44258	UNIPROT:P29378	0.189394	RXN-10423	R310-RXN	0.894395
UNIPROT:Q44258	UNIPROT:P13448	0.210127	RXN-10423	R310-RXN	0.894395
UNIPROT:Q44258	UNIPROT:B4ER98	0.210127	RXN-10423	RXN-20237	0.890148
UNIPROT:Q44258	UNIPROT:A9CEQ7	0.192893	RXN-10423	RXN-15901	0.888033
UNIPROT:Q44258	UNIPROT:O87697	0.170854	RXN-10423	RXN-8763	0.878936
UNIPROT:Q44258	UNIPROT:Q58544	0.188917	RXN-10423	RXN-8763	0.878936
UNIPROT:Q44258	UNIPROT:Q05631	0.160804	RXN-10423	RXN-8763	0.878936
UNIPROT:Q44258	UNIPROT:A0A286SC67	0.156566	RXN-10423	RXN-20259	0.884929
UNIPROT:Q44258	UNIPROT:Q9AJU0	0.213918	RXN-10423	RXN-15403	0.889078
UNIPROT:Q44258	UNIPROT:Q9RAH6	0.219697	RXN-10423	RXN-17837	0.880806
UNIPROT:Q44258	UNIPROT:P0AE22	0.209068	RXN-10423	RXN-14534	0.878367
UNIPROT:Q44258	UNIPROT:Q9ALN3	0.179747	RXN-10423	RXN-13630	0.87096
UNIPROT:Q44258	UNIPROT:I6YER9	0.224181	RXN-10423	RXN-15423	0.884822
UNIPROT:Q44258	UNIPROT:A7B3K3	0.208122	RXN-10423	RXN-17412	0.27751
UNIPROT:Q44258	UNIPROT:E4N7E5	0.190355	RXN-10423	RXN-18790	0.879075
UNIPROT:Q44258	UNIPROT:H2E7T7	0.122807	RXN-10423	RXN-13283	0.885859
UNIPROT:Q44258	UNIPROT:Q8GRC8	0.126866	RXN-10423	RXN-11768	0.892178
UNIPROT:Q44258	UNIPROT:Q9ZFV4	0.202532	RXN-10423	RXN-19333	0.886582
UNIPROT:Q44258	UNIPROT:E5Y946	0.133663	RXN-10423	RXN-20702	0.892765
UNIPROT:Q44258	UNIPROT:Q82RR7	0.175879	RXN-10423	RXN-12831	0.878152
UNIPROT:Q44258	UNIPROT:Q00870	0.165414	RXN-10423	KIEVITONE-HYDRATASE-RXN	0.878426
UNIPROT:Q44258	UNIPROT:F8J3H2	0.214646	RXN-10423	RXN-17563	0.88598
UNIPROT:Q44258	UNIPROT:Q8T882	0.127451	RXN-10423	TAUROPINE-DEHYDROGENASE-RXN	0.104102
UNIPROT:Q44258	UNIPROT:Q60FC7	0.170051	RXN-10423	TAUROPINE-DEHYDROGENASE-RXN	0.104102
UNIPROT:Q44258	UNIPROT:Q56778	0.214646	RXN-10423	RXN-11802	0.880842
UNIPROT:Q44258	UNIPROT:P0DOV6	0.221662	RXN-10423	RXN-17095	0.883851
UNIPROT:Q44258	UNIPROT:O34707	0.146465	RXN-10423	RXN-13337	0.87313
UNIPROT:Q44258	UNIPROT:Q6XBI8	0.153652	RXN-10423	RXN-17580	0.116272
UNIPROT:Q44258	UNIPROT:E1XUJ2	0.144608	RXN-10423	RXN-12335	0.888106
UNIPROT:Q44258	UNIPROT:D0ZLR3	0.15869	RXN-10423	RXN-14730	0.878659
UNIPROT:Q44258	UNIPROT:A9CK30	0.2267	RXN-10423	RXN-9936	0.887013
UNIPROT:Q44258	UNIPROT:D7R619	0.2	RXN-10423	RXN-12902	0.882152
UNIPROT:Q44258	UNIPROT:D7R620	0.228947	RXN-10423	RXN-12902	0.882152
UNIPROT:Q44258	UNIPROT:A2SP37	0.170854	RXN-10423	RXN-17613	0.0773163
UNIPROT:Q44258	UNIPROT:Q59M69	0.130653	RXN-10423	4.2.1.93-RXN	0.872697
UNIPROT:Q44258	UNIPROT:C5Y210	0.139303	RXN-10423	4.2.1.93-RXN	0.872697
UNIPROT:Q44258	UNIPROT:P36059	0.161616	RXN-10423	4.2.1.93-RXN	0.872697
UNIPROT:Q44258	UNIPROT:A9RY03	0.184343	RXN-10423	4.2.1.93-RXN	0.872697
UNIPROT:Q44258	UNIPROT:Q9VVW8	0.153652	RXN-10423	4.2.1.93-RXN	0.872697
UNIPROT:Q44258	UNIPROT:Q5K8L4	0.160804	RXN-10423	4.2.1.93-RXN	0.872697
UNIPROT:Q44258	UNIPROT:E3LAQ9	0.123457	RXN-10423	4.2.1.93-RXN	0.872697
UNIPROT:Q44258	UNIPROT:Q5B0D6	0.145729	RXN-10423	4.2.1.93-RXN	0.872697
UNIPROT:Q44258	UNIPROT:F6RCC2	0.153652	RXN-10423	4.2.1.93-RXN	0.872697
UNIPROT:Q44258	UNIPROT:C0NFV9	0.1625	RXN-10423	4.2.1.93-RXN	0.872697
UNIPROT:Q44258	UNIPROT:B7PBI5	0.232911	RXN-10423	4.2.1.93-RXN	0.872697
UNIPROT:Q44258	UNIPROT:E0VSF4	0.203008	RXN-10423	4.2.1.93-RXN	0.872697
UNIPROT:Q44258	PID:BAA91797	0.134663	RXN-10423	4.2.1.93-RXN	0.872697
UNIPROT:Q44258	UNIPROT:C4LZV8	0.205584	RXN-10423	4.2.1.93-RXN	0.872697
UNIPROT:Q44258	UNIPROT:Q17NP0	0.177215	RXN-10423	4.2.1.93-RXN	0.872697
UNIPROT:Q44258	UNIPROT:A7RRZ8	0.163317	RXN-10423	4.2.1.93-RXN	0.872697
UNIPROT:Q44258	UNIPROT:O94347	0.168766	RXN-10423	4.2.1.93-RXN	0.872697
UNIPROT:Q44258	UNIPROT:B7FXE8	0.189873	RXN-10423	4.2.1.93-RXN	0.872697
UNIPROT:Q44258	UNIPROT:Q4P219	0.173804	RXN-10423	4.2.1.93-RXN	0.872697
UNIPROT:Q44258	UNIPROT:A8X354	0.176322	RXN-10423	4.2.1.93-RXN	0.872697
UNIPROT:Q44258	UNIPROT:F4NZ38	0.183879	RXN-10423	4.2.1.93-RXN	0.872697
UNIPROT:Q44258	UNIPROT:A8N8Z0	0.188917	RXN-10423	4.2.1.93-RXN	0.872697
UNIPROT:Q44258	UNIPROT:Q7SHU9	0.168766	RXN-10423	4.2.1.93-RXN	0.872697
UNIPROT:Q44258	UNIPROT:Q9XB59	0.186398	RXN-10423	RXN-8949	0.878224
UNIPROT:Q44258	UNIPROT:Q05182	0.183879	RXN-10423	PHTHALATE-45-DIOXYGENASE-RXN	0.0944546
UNIPROT:Q44258	UNIPROT:P55818	0.19697	RXN-10423	RXN-2883	0.687072
UNIPROT:Q44258	UNIPROT:O85012	0.222222	RXN-10423	RXN-2883	0.687072
UNIPROT:Q44258	UNIPROT:Q5U914	0.20403	RXN-10423	RXN-11984	0.883127
UNIPROT:Q44258	UNIPROT:A0A4Y1MT04	0.162562	RXN-10423	GLUTARATE--COA-LIGASE-RXN	0.882937
UNIPROT:Q44258	UNIPROT:A9WLH9	0.19697	RXN-10423	GLUTARATE--COA-LIGASE-RXN	0.882937
UNIPROT:Q44258	UNIPROT:S7SR96	0.14951	RXN-10423	GLUTARATE--COA-LIGASE-RXN	0.882937
UNIPROT:Q44258	UNIPROT:P39849	0.14899	RXN-10423	RXN-8581	0.121465
UNIPROT:Q44258	UNIPROT:O52791	0.170854	RXN-10423	1.13.11.46-RXN	0.87621
UNIPROT:Q44258	UNIPROT:Q9C6I4	0.163728	RXN-10423	RXN-115	0.876644
UNIPROT:Q44258	PID:AAN87571	0.15869	RXN-10423	RXN-115	0.876644
UNIPROT:Q44258	UNIPROT:Q9SQ80	0.162907	RXN-10423	RXN-115	0.876644
UNIPROT:Q44258	UNIPROT:Q5ZA21	0.157895	RXN-10423	RXN-115	0.876644
UNIPROT:Q44258	PID:O64692	0.153652	RXN-10423	RXN-115	0.876644
UNIPROT:Q44258	PID:AAN87572	0.173804	RXN-10423	RXN-115	0.876644
UNIPROT:Q44258	UNIPROT:Q8S0S6	0.180905	RXN-10423	RXN-115	0.876644
UNIPROT:Q44258	UNIPROT:O49561	0.178841	RXN-10423	RXN-115	0.876644
UNIPROT:Q44258	UNIPROT:Q9C7Z1	0.176322	RXN-10423	RXN-115	0.876644
UNIPROT:Q44258	UNIPROT:Q7XP65	0.156171	RXN-10423	RXN-115	0.876644
UNIPROT:Q44258	UNIPROT:Q8LGZ9	0.168766	RXN-10423	RXN-115	0.876644
UNIPROT:Q44258	UNIPROT:Q841K9	0.175879	RXN-10423	RXN-15942	0.872146
UNIPROT:Q44258	UNIPROT:P15006	0.153266	RXN-10423	RXN0-2941	0.898106
UNIPROT:Q44258	UNIPROT:Q83WF5	0.137157	RXN-10423	RXN-15053	0.266286
UNIPROT:Q44258	UNIPROT:A0A452CSY6	0.191436	RXN-10423	2.7.99.1-RXN	0.892516
UNIPROT:Q44258	UNIPROT:P00458	0.206549	RXN-10423	NITROGENASE-FLAVODOXIN-RXN	0.878781
UNIPROT:Q44258	UNIPROT:P00459	0.214646	RXN-10423	NITROGENASE-FLAVODOXIN-RXN	0.878781
UNIPROT:Q44258	UNIPROT:P0A8T1	0.197468	RXN-10423	RXN0-5419	0.905809
UNIPROT:Q44258	UNIPROT:B2J8P8	0.148883	RXN-10423	RXN-14462	0.895628
UNIPROT:Q44258	UNIPROT:Q9I6K2	0.2	RXN-10423	GUANIDINOPROPIONASE-RXN	0.892446
UNIPROT:Q44258	UNIPROT:Q83YH7	0.17402	RXN-10423	RXN-10668	0.889655
UNIPROT:Q44258	UNIPROT:O87871	0.141058	RXN-10423	HADTHAUERA-RXN	0.570302
UNIPROT:Q44258	UNIPROT:A9IE89	0.176322	RXN-10423	RXN-13638	0.882793
UNIPROT:Q44258	UNIPROT:P37749	0.176322	RXN-10423	RXN0-5210	0.883694
UNIPROT:Q44258	UNIPROT:Q9F834	0.231738	RXN-10423	RXN-13660	0.360334
UNIPROT:Q44258	UNIPROT:P27099	0.141414	RXN-10423	RXN-18360	0.880304
UNIPROT:Q44258	UNIPROT:Q8GMW5	0.19797	RXN-10423	RXN-8747	0.893386
UNIPROT:Q44258	UNIPROT:E3UBL6	0.211587	RXN-10423	RXN-15498	0.882646
UNIPROT:Q44258	UNIPROT:P73538	0.153266	RXN-10423	RXN-17473	0.883013
UNIPROT:Q44258	UNIPROT:P12996	0.175879	RXN-10423	RXN-17473	0.883013
UNIPROT:Q44258	UNIPROT:Q70GK9	0.186398	RXN-10423	2.5.1.63-RXN	0.888472
UNIPROT:Q44258	UNIPROT:J9QS25	0.152882	RXN-10423	RXN-13763	0.877355
UNIPROT:Q44258	UNIPROT:B2J1M1	0.20403	RXN-10423	RXN-13286	0.898241
UNIPROT:Q44258	UNIPROT:Q6J1Z5	0.228426	RXN-10423	RXN-8836	0.88709
UNIPROT:Q44258	UNIPROT:Q6J1Z6	0.194444	RXN-10423	RXN-8836	0.88709
UNIPROT:Q44258	UNIPROT:P94681	0.225316	RXN-10423	SYDDEHYD-RXN	0.0635329
UNIPROT:Q44258	UNIPROT:P0DOV8	0.21883	RXN-10423	RXN-17098	0.877703
UNIPROT:Q44258	UNIPROT:E4MYY0	0.166247	RXN-10423	RXN-18944	0.877611
UNIPROT:Q44258	UNIPROT:Q6TFC6	0.191436	RXN-10423	RXN-14735	0.887025
UNIPROT:Q44258	UNIPROT:P30347	0.194373	RXN-10423	RXN-10902	0.870636
UNIPROT:Q44258	UNIPROT:Q0PCR8	0.146766	RXN-10423	RXN-14755	0.901388
UNIPROT:Q44258	UNIPROT:O82872	0.159601	RXN-10423	4.1.2.42-RXN	0.895827
UNIPROT:Q44258	UNIPROT:E3EJK4	0.168342	RXN-10423	RXN-15664	0.0614209
UNIPROT:Q44258	UNIPROT:A7Z0T4	0.178841	RXN-10423	RXN-15664	0.0614209
UNIPROT:Q44258	UNIPROT:Q59093	0.191436	RXN-10423	RXN-10083	0.879425
UNIPROT:Q44258	UNIPROT:P00632	0.212658	RXN-10423	RXN-10083	0.879425
UNIPROT:Q44258	UNIPROT:Q0P8I6	0.151134	RXN-10423	RXN-16169	0.374239
UNIPROT:Q44258	UNIPROT:P48635	0.150246	RXN-10423	RXN-12926	0.377503
UNIPROT:Q44258	UNIPROT:Q8G9L3	0.203046	RXN-10423	RXN-10118	0.884901
UNIPROT:Q44258	UNIPROT:D2PPM8	0.125	RXN-10423	RXN-18147	0.887134
UNIPROT:Q44258	UNIPROT:Q9LBJ0	0.213198	RXN-10423	RXN-19530	0.898972
UNIPROT:Q44258	UNIPROT:Q6E7F2	0.180203	RXN-10423	1.1.1.266-RXN	0.329206
UNIPROT:Q44258	UNIPROT:A2BD24	0.179293	RXN-10423	1.1.1.266-RXN	0.329206
UNIPROT:Q44258	UNIPROT:Q51979	0.239295	RXN-10423	RXN-667	0.881394
UNIPROT:Q44258	UNIPROT:M1T9N7	0.206549	RXN-10423	RXN-11456	0.905809
UNIPROT:Q44258	UNIPROT:D5FKJ3	0.151899	RXN-10423	RXN-11456	0.905809
UNIPROT:Q44258	UNIPROT:Q9F7D8	0.138191	RXN-10423	6-HYDROXYHEXANOATE-OXIDATION-RXN	0.0761164
UNIPROT:Q44258	UNIPROT:O31041	0.197436	RXN-10423	RXN-21079	0.898995
UNIPROT:Q44258	UNIPROT:B3TZD8	0.155941	RXN-10423	RXN-15363	0.883832
UNIPROT:Q44258	UNIPROT:B3TZD9	0.18136	RXN-10423	RXN-15363	0.883832
UNIPROT:Q44258	UNIPROT:Q8ZKR2	0.197995	RXN-10423	RXN-19750	0.890156
UNIPROT:Q44258	UNIPROT:P0ABQ2	0.20403	RXN-10423	RXN0-5289	0.0808354
UNIPROT:Q44258	UNIPROT:P77161	0.214834	RXN-10423	RXN0-5289	0.0808354
UNIPROT:Q44258	UNIPROT:Q9I5I6	0.21608	RXN-10423	RXN-16008	0.0666991
UNIPROT:Q44258	UNIPROT:Q3SLJ4	0.193467	RXN-10423	RXN-9230	0.873713
UNIPROT:Q44258	UNIPROT:Q3IHW5	0.19797	RXN-10423	RXN-9230	0.873713
UNIPROT:Q44258	UNIPROT:A1KSZ7	0.188917	RXN-10423	RXN-9230	0.873713
UNIPROT:Q44258	UNIPROT:Q6D9I8	0.166247	RXN-10423	RXN-9230	0.873713
UNIPROT:Q44258	UNIPROT:Q499N4	0.1725	RXN-10423	RXN-9230	0.873713
UNIPROT:Q44258	UNIPROT:Q6F9N8	0.171285	RXN-10423	RXN-9230	0.873713
UNIPROT:Q44258	UNIPROT:Q3IZ43	0.161209	RXN-10423	RXN-9230	0.873713
UNIPROT:Q44258	UNIPROT:A2SMA7	0.19171	RXN-10423	RXN-9230	0.873713
UNIPROT:Q44258	UNIPROT:P32378	0.160804	RXN-10423	RXN-9230	0.873713
UNIPROT:Q44258	UNIPROT:Q8DD49	0.188917	RXN-10423	RXN-9230	0.873713
UNIPROT:Q44258	UNIPROT:A4SZT5	0.209068	RXN-10423	RXN-9230	0.873713
UNIPROT:Q44258	UNIPROT:Q1GXB3	0.171717	RXN-10423	RXN-9230	0.873713
UNIPROT:Q44258	UNIPROT:A5CXV6	0.193955	RXN-10423	RXN-9230	0.873713
UNIPROT:Q44258	UNIPROT:Q8PQD5	0.20603	RXN-10423	RXN-9230	0.873713
UNIPROT:Q44258	UNIPROT:Q10252	0.15404	RXN-10423	RXN-9230	0.873713
UNIPROT:Q44258	UNIPROT:Q298G6	0.111663	RXN-10423	RXN-9230	0.873713
UNIPROT:Q44258	UNIPROT:Q82TP2	0.174684	RXN-10423	RXN-9230	0.873713
UNIPROT:Q44258	UNIPROT:Q47J11	0.189394	RXN-10423	RXN-9230	0.873713
UNIPROT:Q44258	UNIPROT:Q0A5V9	0.191919	RXN-10423	RXN-9230	0.873713
UNIPROT:Q44258	UNIPROT:Q1Q996	0.178841	RXN-10423	RXN-9230	0.873713
UNIPROT:Q44258	UNIPROT:Q5P5M0	0.184143	RXN-10423	RXN-9230	0.873713
UNIPROT:Q44258	UNIPROT:Q6LVS3	0.193955	RXN-10423	RXN-9230	0.873713
UNIPROT:Q44258	UNIPROT:Q3JBS8	0.199488	RXN-10423	RXN-9230	0.873713
UNIPROT:Q44258	UNIPROT:Q2NR07	0.172152	RXN-10423	RXN-9230	0.873713
UNIPROT:Q44258	UNIPROT:A1T087	0.164975	RXN-10423	RXN-9230	0.873713
UNIPROT:Q44258	UNIPROT:Q1LJ64	0.176322	RXN-10423	RXN-9230	0.873713
UNIPROT:Q44258	UNIPROT:Q2SNV5	0.152284	RXN-10423	RXN-9230	0.873713
UNIPROT:Q44258	UNIPROT:Q8I7J4	0.13602	RXN-10423	RXN-9230	0.873713
UNIPROT:Q44258	UNIPROT:Q5QUP3	0.193955	RXN-10423	RXN-9230	0.873713
UNIPROT:Q44258	UNIPROT:Q21S73	0.186398	RXN-10423	RXN-9230	0.873713
UNIPROT:Q44258	UNIPROT:B0U2A2	0.18136	RXN-10423	RXN-9230	0.873713
UNIPROT:Q44258	UNIPROT:Q494A7	0.178841	RXN-10423	RXN-9230	0.873713
UNIPROT:Q44258	UNIPROT:Q5WWR8	0.193955	RXN-10423	RXN-9230	0.873713
UNIPROT:Q44258	UNIPROT:Q0VTA7	0.185567	RXN-10423	RXN-9230	0.873713
UNIPROT:Q44258	UNIPROT:Q31DM4	0.206186	RXN-10423	RXN-9230	0.873713
UNIPROT:Q44258	UNIPROT:A9KGW7	0.195431	RXN-10423	RXN-9230	0.873713
UNIPROT:Q44258	UNIPROT:Q1QSG2	0.18481	RXN-10423	RXN-9230	0.873713
UNIPROT:Q44258	UNIPROT:Q2Y5S3	0.180203	RXN-10423	RXN-9230	0.873713
UNIPROT:Q44258	PID:AAH20728	0.168317	RXN-10423	RXN-9230	0.873713
UNIPROT:Q44258	UNIPROT:A1WKC0	0.189394	RXN-10423	RXN-9230	0.873713
UNIPROT:Q44258	UNIPROT:A4VGN3	0.192893	RXN-10423	RXN-9230	0.873713
UNIPROT:Q44258	UNIPROT:Q608Z9	0.188776	RXN-10423	RXN-9230	0.873713
UNIPROT:Q44258	UNIPROT:Q12S01	0.171285	RXN-10423	RXN-9230	0.873713
UNIPROT:Q44258	UNIPROT:Q55500	0.193955	RXN-10423	RXN-9230	0.873713
UNIPROT:Q44258	UNIPROT:B0BPA2	0.178571	RXN-10423	RXN-9230	0.873713
UNIPROT:Q44258	UNIPROT:Q21DY7	0.182278	RXN-10423	RXN-9230	0.873713
UNIPROT:Q44258	UNIPROT:Q8KQL2	0.161209	RXN-10423	RXN-11107	0.0807937
UNIPROT:Q44258	UNIPROT:Q92V74	0.1725	RXN-10423	RXN-17958	0.887258
UNIPROT:Q44258	UNIPROT:Q84CG1	0.158809	RXN-10423	RXN-14636	0.899168
UNIPROT:Q44258	UNIPROT:P27240	0.211587	RXN-10423	RXN0-5123	0.881974
UNIPROT:Q44258	UNIPROT:P18204	0.0975	RXN-10423	INDOLEACETATE--LYSINE-LIGASE-RXN	0.879742
UNIPROT:Q44258	UNIPROT:P0DPK6	0.146096	RXN-10423	RXN-18785	0.875306
UNIPROT:Q44258	UNIPROT:Q54376	0.19598	RXN-10423	RXN-21205	0.898145
UNIPROT:Q44258	UNIPROT:O07457	0.194444	RXN-10423	R267-RXN	0.562086
UNIPROT:Q44258	UNIPROT:Q70KH3	0.210127	RXN-10423	RXN-20209	0.891104
UNIPROT:Q44258	UNIPROT:Q83WF2	0.115764	RXN-10423	RXN-12801	0.885503
UNIPROT:Q44258	UNIPROT:Q46856	0.158924	RXN-10423	RXN0-6487	0.124065
UNIPROT:Q44258	UNIPROT:D2B747	0.197995	RXN-10423	RXN-18824	0.87767
UNIPROT:Q44258	UNIPROT:A4UVY1	0.191436	RXN-10423	RXN-8847	0.108639
UNIPROT:Q44258	UNIPROT:Q8KES3	0.201511	RXN-10423	RXN-13222	0.123681
UNIPROT:Q44258	UNIPROT:Q09927	0.183206	RXN-10423	RXN-19375	0.894068
UNIPROT:Q44258	UNIPROT:E9P8D2	0.221354	RXN-10423	RXN-19375	0.894068
UNIPROT:Q44258	UNIPROT:O81884	0.207071	RXN-10423	RXN-1884	0.0790027
UNIPROT:Q44258	UNIPROT:B9W4V6	0.155779	RXN-10423	RXN-11814	0.899663
UNIPROT:Q44258	UNIPROT:P95748	0.219144	RXN-10423	RXN-12772	0.893511
UNIPROT:Q44258	UNIPROT:Q44297	0.180451	RXN-10423	1.5.1.28-RXN	0.152117
UNIPROT:Q44258	UNIPROT:P23133	0.192893	RXN-10423	2-OH-6-OXOHEPTA-2-4-DIENOATE-HYDR-RXN	0.886347
UNIPROT:Q44258	UNIPROT:Q4JZE6	0.21875	RXN-10423	RXN-13745	0.882891
UNIPROT:Q44258	UNIPROT:G2IMF2	0.20202	RXN-10423	RXN-19408	0.308978
UNIPROT:Q44258	UNIPROT:B6EHB9	0.14899	RXN-10423	RXN-15654	0.877056
UNIPROT:Q44258	UNIPROT:A0A9I9	0.137255	RXN-10423	STROMBINE-DEHYDROGENASE-RXN	0.078273
UNIPROT:Q44258	UNIPROT:Q0P9D3	0.150617	RXN-10423	RXN-12812	0.87872
UNIPROT:Q44258	UNIPROT:A0A0D4BS80	0.214646	RXN-10423	RXN-17532	0.877179
UNIPROT:Q44258	UNIPROT:E9NPJ4	0.197468	RXN-10423	RXN-20454	0.874201
UNIPROT:Q44258	UNIPROT:P72140	0.15	RXN-10423	RXN-14783	0.899168
UNIPROT:Q44258	UNIPROT:Q9I1Q2	0.144963	RXN-10423	RXN-15590	0.883737
UNIPROT:Q44258	UNIPROT:M1V9Q0	0.15212	RXN-10423	RXN-15706	0.874193
UNIPROT:Q44258	UNIPROT:Q56779	0.224747	RXN-10423	RXN-11792	0.881426
UNIPROT:Q44258	UNIPROT:Q44577	0.217172	RXN-10423	RXN-11792	0.881426
UNIPROT:Q44258	UNIPROT:Q8RL55	0.204545	RXN-10423	RXN-19875	0.875144
UNIPROT:Q44258	UNIPROT:P50197	0.219072	RXN-10423	LINC-RXN	0.0610284
UNIPROT:Q44258	UNIPROT:A0A0M3WRK0	0.206549	RXN-10423	RXN-17198	0.886016
UNIPROT:Q44258	UNIPROT:Q9WYP4	0.19697	RXN-10423	RXN-14359	0.898413
UNIPROT:Q44258	UNIPROT:Q44250	0.21519	RXN-10423	RXN-15251	0.87652
UNIPROT:Q44258	UNIPROT:Q607G3	0.189873	RXN-10423	RXN-17664	0.122574
UNIPROT:Q44258	UNIPROT:D4GYH3	0.176768	RXN-10423	RXN-16599	0.886344
UNIPROT:Q44258	UNIPROT:Q7WYU8	0.186398	RXN-10423	RXN-10889	0.900898
UNIPROT:Q44258	UNIPROT:P22636	0.186869	RXN-10423	RXN-10889	0.900898
UNIPROT:Q44258	UNIPROT:Q56166	0.219697	RXN-10423	RXN-11977	0.839335
UNIPROT:Q44258	UNIPROT:Q56167	0.193955	RXN-10423	RXN-11977	0.839335
UNIPROT:Q44258	UNIPROT:P9WIM5	0.208122	RXN-10423	RXN-17288	0.894215
UNIPROT:Q44258	UNIPROT:Q8KQE6	0.175879	RXN-10423	RXN-17639	0.122574
UNIPROT:Q44258	UNIPROT:Q8KQE9	0.154791	RXN-10423	RXN-17639	0.122574
UNIPROT:Q44258	UNIPROT:Q9AJE3	0.20403	RXN-10423	RXN-9455	0.875809
UNIPROT:Q44258	UNIPROT:A0A096ZED0	0.166667	RXN-10423	RXN-16303	0.889838
UNIPROT:Q44258	UNIPROT:A0A096ZEC9	0.171285	RXN-10423	RXN-16303	0.889838
UNIPROT:Q44258	UNIPROT:Q8TUC0	0.1675	RXN-10423	RXN-13080	0.882487
UNIPROT:Q44258	UNIPROT:A8NU13	0.1875	RXN-10423	RXN-8551	0.8776
UNIPROT:Q44258	UNIPROT:P21258	0.14951	RXN-10423	RXN-11459	0.882762
UNIPROT:Q44258	UNIPROT:A0A072UVA5	0.193955	RXN-10423	RXN-3585	0.881698
UNIPROT:Q44258	UNIPROT:A0A2P6Q9N0	0.19797	RXN-10423	RXN-3585	0.881698
UNIPROT:Q44258	UNIPROT:A0A396HBZ7	0.201511	RXN-10423	RXN-3585	0.881698
UNIPROT:Q44258	UNIPROT:Q9L4W8	0.152334	RXN-10423	RXN-16252	0.554554
UNIPROT:Q44258	UNIPROT:B5GVJ0	0.219697	RXN-10423	RXN-16879	0.891451
UNIPROT:Q44258	UNIPROT:Q55217	0.216625	RXN-10423	RXN-14861	0.88414
UNIPROT:Q44258	UNIPROT:Q841L0	0.176322	RXN-10423	RXN-15927	0.881295
UNIPROT:Q44258	UNIPROT:P07383	0.171717	RXN-10423	TROPINESTERASE-RXN	0.878801
UNIPROT:Q44258	UNIPROT:Q9ALM9	0.217172	RXN-10423	RXN-13633	0.888476
UNIPROT:Q44258	UNIPROT:Q57900	0.216625	RXN-10423	RXN-15944	0.890932
UNIPROT:Q44258	UNIPROT:R9TPE4	0.19697	RXN-10423	RXN-11518	0.0889762
UNIPROT:Q44258	UNIPROT:M1EY73	0.189394	RXN-10423	RXN-11518	0.0889762
UNIPROT:Q44258	UNIPROT:E5AX04	0.11809	RXN-10423	RXN-13073	0.885881
UNIPROT:Q44258	UNIPROT:E8W6C7	0.18593	RXN-10423	RXN-18793	0.873165
UNIPROT:Q44258	UNIPROT:Q643C8	0.165829	RXN-10423	RXN-14468	0.901705
UNIPROT:Q44258	UNIPROT:Q54375	0.213198	RXN-10423	RXN-21213	0.88356
UNIPROT:Q44258	UNIPROT:P0ABK5	0.180905	RXN-10423	S-CARBOXYMETHYLCYSTEINE-SYNTHASE-RXN	0.890528
UNIPROT:Q44258	UNIPROT:C6WFL3	0.154229	RXN-10423	RXN-17373	0.878751
UNIPROT:Q44258	UNIPROT:E2PZ87	0.164141	RXN-10423	RXN-16869	0.893192
UNIPROT:Q44258	UNIPROT:Q05590	0.222785	RXN-10423	RXN-8761	0.874038
UNIPROT:Q44258	UNIPROT:Q9ZHQ4	0.133333	RXN-10423	DEMETHYLMACROCIN-O-METHYLTRANSFERASE-RXN	0.884298
UNIPROT:Q44258	UNIPROT:W0LV34	0.214106	RXN-10423	RXN-15400	0.878299
UNIPROT:Q44258	UNIPROT:Q841K5	0.141089	RXN-10423	RXN-15938	0.87552
UNIPROT:Q44258	UNIPROT:Q8TKU6	0.134663	RXN-10423	R231-RXN	0.886644
UNIPROT:Q44258	UNIPROT:A2AXG5	0.195431	RXN-10423	RXN-15421	0.877552
UNIPROT:Q44258	UNIPROT:Q54355	0.195431	RXN-10423	RXN-21208	0.877772
UNIPROT:Q44258	UNIPROT:P77503	0.215686	RXN-10423	RXN-20682	0.0687137
UNIPROT:Q44258	UNIPROT:Q56772	0.168342	RXN-10423	RXN-11800	0.883468
UNIPROT:Q44258	UNIPROT:D3WZ86	0.186398	RXN-10423	RXN-14253	0.884016
UNIPROT:Q44258	UNIPROT:Q5V8A6	0.129032	RXN-10423	RXN-17002	0.875228
UNIPROT:Q44258	UNIPROT:Q84IP8	0.171285	RXN-10423	RXN-10897	0.881809
UNIPROT:Q44258	UNIPROT:Q8RJ47	0.174684	RXN-10423	RXN-10897	0.881809
UNIPROT:Q44258	UNIPROT:B7X4E0	0.191436	RXN-10423	RXN-15638	0.890219
UNIPROT:Q44258	UNIPROT:A9AWD6	0.176322	RXN-10423	RXN-18973	0.873535
UNIPROT:Q44258	UNIPROT:Q9AJC6	0.153086	RXN-10423	RXN-8808	0.0693348
UNIPROT:Q44258	UNIPROT:O33708	0.229798	RXN-10423	RXN-18003	0.332043
UNIPROT:Q44258	UNIPROT:Q8X5N4	0.209302	RXN-10423	RXN-18463	0.780227
UNIPROT:Q44258	UNIPROT:S4W780	0.146465	RXN-10423	RXN-16694	0.894137
UNIPROT:Q44258	UNIPROT:P35270	0.214106	RXN-10423	1.1.1.220-RXN	0.145847
UNIPROT:Q44258	UNIPROT:A0A1X9QHJ0	0.183879	RXN-10423	1.1.1.285-RXN	0.154224
UNIPROT:Q44258	UNIPROT:Q0PCF5	0.176322	RXN-10423	1.1.1.285-RXN	0.154224
UNIPROT:Q44258	UNIPROT:P54997	0.178392	RXN-10423	RXN-624	0.883065
UNIPROT:Q44258	UNIPROT:P43623	0.173804	RXN-10423	RXN-19561	0.890268
UNIPROT:Q44258	UNIPROT:Q8L347	0.198992	RXN-10423	RXN-14763	0.121561
UNIPROT:Q44258	UNIPROT:Q83WG6	0.14951	RXN-10423	RXN-10930	0.878828
UNIPROT:Q44258	UNIPROT:Q5W242	0.173804	RXN-10423	RXN-15785	0.0841582
UNIPROT:Q44258	UNIPROT:Q8RMD4	0.204545	RXN-10423	RXN-16280	0.88386
UNIPROT:Q44258	UNIPROT:Q8RMD1	0.212658	RXN-10423	RXN-16712	0.899168
UNIPROT:Q44258	UNIPROT:Q75VW6	0.170051	RXN-10423	CITRATE--COA-LIGASE-RXN	0.883574
UNIPROT:Q44258	UNIPROT:D2Z030	0.219697	RXN-10423	RXN-14460	0.892321
UNIPROT:Q44258	UNIPROT:O86043	0.209596	RXN-10423	MALEYLPYRUVATE-ISOMERASE-RXN	0.899168
UNIPROT:Q44258	UNIPROT:Q8NLC1	0.216625	RXN-10423	MALEYLPYRUVATE-ISOMERASE-RXN	0.899168
UNIPROT:Q44258	UNIPROT:Q9WXT2	0.168766	RXN-10423	CEPHALOSPORIN-C-DEACETYLASE-RXN	0.880485
UNIPROT:Q44258	UNIPROT:P94388	0.178841	RXN-10423	CEPHALOSPORIN-C-DEACETYLASE-RXN	0.880485
UNIPROT:Q44258	UNIPROT:P11444	0.168766	RXN-10423	MANDELATE-RACEMASE-RXN	0.899168
UNIPROT:Q44258	UNIPROT:A9CPS8	0.2125	RXN-10423	RXN-11152	0.882531
UNIPROT:Q44258	UNIPROT:P0A955	0.216625	RXN-10423	RXN-13990	0.894122
UNIPROT:Q44258	UNIPROT:B6CWJ2	0.229798	RXN-10423	RXN-12154	0.881634
UNIPROT:Q44258	UNIPROT:Q2YIQ3	0.163317	RXN-10423	RXN-17771	0.899168
UNIPROT:Q44258	UNIPROT:Q53U10	0.231738	RXN-10423	RXN-13177	0.887353
UNIPROT:Q44258	UNIPROT:Q54360	0.216625	RXN-10423	RXN-21216	0.895054
UNIPROT:Q44258	UNIPROT:Q8KDS7	0.188917	RXN-10423	RXN-19140	0.885148
UNIPROT:Q44258	UNIPROT:P0A9S5	0.16792	RXN-10423	RXN-8632	0.10506
UNIPROT:Q44258	UNIPROT:P15121	0.180905	RXN-10423	RXN-8632	0.10506
UNIPROT:Q44258	UNIPROT:A1K6X2	0.18481	RXN-10423	1.14.13.61-RXN	0.0595319
UNIPROT:Q44258	UNIPROT:W8X526	0.224747	RXN-10423	RXN-20144	0.577079
UNIPROT:Q44258	UNIPROT:A6KWY2	0.220253	RXN-10423	RXN-15924	0.113423
UNIPROT:Q44258	UNIPROT:Q9AJU1	0.140351	RXN-10423	RXN-15404	0.889381
UNIPROT:Q44258	UNIPROT:A0A0H3L1B8	0.189873	RXN-10423	RXN-21280	0.884791
UNIPROT:Q44258	UNIPROT:Q0P8V9	0.178841	RXN-10423	RXN-12235	0.887164
UNIPROT:Q44258	UNIPROT:Q9ALN0	0.14604	RXN-10423	RXN-13631	0.888647
UNIPROT:Q44258	UNIPROT:Q2L6E3	0.175879	RXN-10423	RXN-15425	0.879805
UNIPROT:Q44258	UNIPROT:Q5KSN4	0.209068	RXN-10423	RXN-9299	0.876953
UNIPROT:Q44258	UNIPROT:P13082	0.204545	RXN-10423	STREPTOMYCIN-3-KINASE-RXN	0.885462
UNIPROT:Q44258	UNIPROT:P18150	0.232323	RXN-10423	STREPTOMYCIN-3-KINASE-RXN	0.885462
UNIPROT:Q44258	UNIPROT:P0DL13	0.178392	RXN-10423	RXN-13761	0.87841
UNIPROT:Q44258	UNIPROT:Q9HZV7	0.196474	RXN-10423	ISOHEXENYLGLUTACONYL-COA-HYDRATASE-RXN	0.879041
UNIPROT:Q44258	UNIPROT:P21133	0.180451	RXN-10423	RXN-17061	0.881911
UNIPROT:Q44258	UNIPROT:P0ACA7	0.210127	RXN-10423	RXN0-6549	0.894446
UNIPROT:Q44258	UNIPROT:Q01109	0.201511	RXN-10423	RXN-10840	0.886519
UNIPROT:Q44258	UNIPROT:B5GS26	0.189394	RXN-10423	RXN-12832	0.876367
UNIPROT:Q44258	UNIPROT:A0A0A8J6B3	0.1675	RXN-10423	RXN-17078	0.87847
UNIPROT:Q44258	UNIPROT:Q2MF64	0.222222	RXN-10423	RXN-13208	0.88803
UNIPROT:Q44258	UNIPROT:A0A318P116	0.163772	RXN-10423	RXN-20719	0.877398
UNIPROT:Q44258	PID:QDE10275.1	0.174684	RXN-10423	RXN-12208	0.145847
UNIPROT:Q44258	UNIPROT:Q00460	0.189394	RXN-10423	RXN-18391	0.081119
UNIPROT:Q44258	UNIPROT:P32352	0.210127	RXN-10423	RXN3O-203	0.877754
UNIPROT:Q44258	UNIPROT:E5KJ99	0.186398	RXN-10423	RXN-18069	0.880236
UNIPROT:Q44258	UNIPROT:D4GP31	0.224747	RXN-10423	RXN-12246	0.883321
UNIPROT:Q44258	UNIPROT:A0A0H3C6P8	0.194937	RXN-10423	RXN-12246	0.883321
UNIPROT:Q44258	UNIPROT:K4REZ6	0.227273	RXN-10423	RXN-18509	0.881893
UNIPROT:Q44258	UNIPROT:G9EZR6	0.183879	RXN-10423	INDOLELACTATE-DEHYDROGENASE-RXN	0.232371
UNIPROT:Q44258	UNIPROT:A0A1B4XTS0	0.153652	RXN-10423	L-XYLOSE-1-DEHYDROGENASE-RXN	0.119056
UNIPROT:Q44258	UNIPROT:Q58247	0.19697	RXN-10423	RXN-12356	0.88358
UNIPROT:Q44258	UNIPROT:P52984	0.19685	RXN-10423	GALACTOACETYLTRAN-RXN	0.891603
UNIPROT:Q44258	UNIPROT:B5HDJ6	0.155779	RXN-10423	RXN-18886	0.877126
UNIPROT:Q44258	UNIPROT:O87833	0.153846	RXN-10423	RXN-12802	0.891047
UNIPROT:Q44258	UNIPROT:Q6N8W7	0.234257	RXN-10423	RXN-13392	0.879813
UNIPROT:Q44258	UNIPROT:P84888	0.133663	RXN-10423	ARALKYLAMINE-DEHYDROGENASE-RXN	0.898054
UNIPROT:Q44258	UNIPROT:Q0X0A8	0.190955	RXN-10423	RXN-17156	0.889369
UNIPROT:Q44258	UNIPROT:Q97K92	0.138958	RXN-10423	RXN-14692	0.128045
UNIPROT:Q44258	UNIPROT:E3SET7	0.21134	RXN-10423	RXN-19528	0.8857
UNIPROT:Q44258	UNIPROT:Q93TU6	0.209068	RXN-10423	RXN-13332	0.883849
UNIPROT:Q44258	UNIPROT:A0A482UYG1	0.131841	RXN-10423	RXN-15617	0.869724
UNIPROT:Q44258	UNIPROT:Q988D0	0.209068	RXN-10423	4.1.1.51-RXN	0.883955
UNIPROT:Q44258	UNIPROT:O82834	0.188917	RXN-10423	RXN-10895	0.878342
UNIPROT:Q44258	PID:AAH25724	0.188917	RXN-10423	RXN-13363	0.203702
UNIPROT:Q44258	UNIPROT:Q0QLF5	0.206549	RXN-10423	1.1.1.291-RXN	0.0598934
UNIPROT:Q44258	UNIPROT:P83772	0.211587	RXN-10423	CREATININASE-RXN	0.891608
UNIPROT:Q44258	UNIPROT:O66183	0.201511	RXN-10423	CREATININASE-RXN	0.891608
UNIPROT:Q44258	UNIPROT:B0R5X4	0.214106	RXN-10423	RXN-6261	0.882403
UNIPROT:Q44258	UNIPROT:Q05600	0.229219	RXN-10423	RXN-6261	0.882403
UNIPROT:Q44258	UNIPROT:P21634	0.194373	RXN-10423	RXN-6261	0.882403
UNIPROT:Q44258	UNIPROT:Q194Q1	0.197995	RXN-10423	RXN-13385	0.705541
UNIPROT:Q44258	UNIPROT:O66188	0.188917	RXN-10423	RXN-1761	0.898897
UNIPROT:Q44258	UNIPROT:B0CN28	0.164557	RXN-10423	RXN-15302	0.900263
UNIPROT:Q44258	UNIPROT:P29082	0.18136	RXN-10423	1.13.11.55-RXN	0.898402
UNIPROT:Q44258	UNIPROT:A0A1V0ELS9	0.155	RXN-10423	RXN-19523	0.885064
UNIPROT:Q44258	UNIPROT:P76423	0.214834	RXN-10423	RXN0-7298	0.894895
UNIPROT:Q44258	UNIPROT:Q8ZL58	0.135135	RXN-10423	RXN-16224	0.876016
UNIPROT:Q44258	UNIPROT:P00733	0.211587	RXN-10423	RXN-15275	0.894648
UNIPROT:Q44258	UNIPROT:Q4K1B3	0.209068	RXN-10423	RXN-13104	0.881276
UNIPROT:Q44258	UNIPROT:P25741	0.216625	RXN-10423	RXN0-5121	0.89682
UNIPROT:Q44258	UNIPROT:M1RY63	0.198992	RXN-10423	RXN-15933	0.892883
UNIPROT:Q44258	UNIPROT:C4WIL4	0.229219	RXN-10423	1.13.11.28-RXN	0.88487
UNIPROT:Q44258	UNIPROT:Q9L9F2	0.201511	RXN-10423	RXN-14545	0.887761
UNIPROT:Q44258	UNIPROT:C0JRF9	0.194937	RXN-10423	RXN-16917	0.901578
UNIPROT:Q44258	UNIPROT:Q988C8	0.212121	RXN-10423	RXN-19622	0.0586503
UNIPROT:Q44258	UNIPROT:Q42605	0.170426	RXN-10423	UDP-ARABINOSE-4-EPIMERASE-RXN	0.899168
UNIPROT:Q44258	UNIPROT:Q92WA3	0.183879	RXN-10423	UDP-ARABINOSE-4-EPIMERASE-RXN	0.899168
UNIPROT:Q44258	UNIPROT:P77256	0.168766	RXN-10423	RXN0-5213	0.0941819
UNIPROT:Q44258	UNIPROT:D1H0I0	0.20403	RXN-10423	RXN-16841	0.88394
UNIPROT:Q44258	UNIPROT:S6AU36	0.153652	RXN-10423	RXN-15022	0.875647
UNIPROT:Q44258	UNIPROT:A4F5C0	0.16962	RXN-10423	RXN-15022	0.875647
UNIPROT:Q44258	UNIPROT:C5CBV8	0.219144	RXN-10423	2.4.1.54-RXN	0.881715
UNIPROT:Q44258	UNIPROT:O86507	0.234257	RXN-10423	UREASE-RXN	0.896566
UNIPROT:Q44258	UNIPROT:Q4ZUD1	0.219144	RXN-10423	UREASE-RXN	0.896566
UNIPROT:Q44258	UNIPROT:Q5J1R4	0.116337	RXN-10423	RXN-17842	0.876868
UNIPROT:Q44258	UNIPROT:Q0P8T1	0.188917	RXN-10423	RXN-12238	0.87847
UNIPROT:Q44258	UNIPROT:Q5ZXH9	0.155	RXN-10423	RXN-12238	0.87847
UNIPROT:Q44258	UNIPROT:O31201	0.219144	RXN-10423	N-FORMYLGLUTAMATE-DEFORMYLASE-RXN	0.883436
UNIPROT:Q44258	UNIPROT:D4HRI4	0.15869	RXN-10423	RXN-15545	0.87911
UNIPROT:Q44258	UNIPROT:M1WXK8	0.232143	RXN-10423	RXN-15017	0.101831
UNIPROT:Q44258	UNIPROT:A0A0D4BS77	0.177215	RXN-10423	RXN-17530	0.892399
UNIPROT:Q44258	UNIPROT:P39400	0.174242	RXN-10423	RXN0-5229	0.130183
UNIPROT:Q44258	UNIPROT:A6KWY5	0.179293	RXN-10423	RXN0-5229	0.130183
UNIPROT:Q44258	UNIPROT:A0A2R4BIG1	0.204082	RXN-10423	KDUD-RXN	0.0743998
UNIPROT:Q44258	UNIPROT:Q5WJ78	0.209068	RXN-10423	KDUD-RXN	0.0743998
UNIPROT:Q44258	UNIPROT:M7N957	0.208226	RXN-10423	KDUD-RXN	0.0743998
UNIPROT:Q44258	UNIPROT:E0Q537	0.196474	RXN-10423	KDUD-RXN	0.0743998
UNIPROT:Q44258	UNIPROT:C5PAN9	0.231552	RXN-10423	KDUD-RXN	0.0743998
UNIPROT:Q44258	UNIPROT:Q6W2B4	0.241814	RXN-10423	KDUD-RXN	0.0743998
UNIPROT:Q44258	UNIPROT:S9S342	0.206549	RXN-10423	KDUD-RXN	0.0743998
UNIPROT:Q44258	UNIPROT:G8NZC2	0.216625	RXN-10423	KDUD-RXN	0.0743998
UNIPROT:Q44258	UNIPROT:Q746L6	0.233668	RXN-10423	KDUD-RXN	0.0743998
UNIPROT:Q44258	UNIPROT:M5F6Z0	0.219388	RXN-10423	KDUD-RXN	0.0743998
UNIPROT:Q44258	UNIPROT:A0A0T6AGT4	0.20202	RXN-10423	KDUD-RXN	0.0743998
UNIPROT:Q44258	UNIPROT:A0A2H1JQ65	0.219697	RXN-10423	KDUD-RXN	0.0743998
UNIPROT:Q44258	UNIPROT:C2F9B1	0.189394	RXN-10423	KDUD-RXN	0.0743998
UNIPROT:Q44258	UNIPROT:K0Q3C3	0.218182	RXN-10423	KDUD-RXN	0.0743998
UNIPROT:Q44258	UNIPROT:A0A0B8N4L7	0.224181	RXN-10423	KDUD-RXN	0.0743998
UNIPROT:Q44258	UNIPROT:A0A330FMH7	0.234097	RXN-10423	KDUD-RXN	0.0743998
UNIPROT:Q44258	UNIPROT:A0QXP6	0.216495	RXN-10423	KDUD-RXN	0.0743998
UNIPROT:Q44258	UNIPROT:A0A1J1LR59	0.20403	RXN-10423	KDUD-RXN	0.0743998
UNIPROT:Q44258	UNIPROT:A0A0M2NGY6	0.194937	RXN-10423	KDUD-RXN	0.0743998
UNIPROT:Q44258	UNIPROT:A9CXT7	0.206549	RXN-10423	KDUD-RXN	0.0743998
UNIPROT:Q44258	UNIPROT:A0A157SQI4	0.224181	RXN-10423	KDUD-RXN	0.0743998
UNIPROT:Q44258	UNIPROT:Q2YIZ9	0.213158	RXN-10423	KDUD-RXN	0.0743998
UNIPROT:Q44258	UNIPROT:E6PWU6	0.191436	RXN-10423	KDUD-RXN	0.0743998
UNIPROT:Q44258	UNIPROT:A0RX79	0.193955	RXN-10423	KDUD-RXN	0.0743998
UNIPROT:Q44258	UNIPROT:A0A090S106	0.19797	RXN-10423	KDUD-RXN	0.0743998
UNIPROT:Q44258	UNIPROT:D4M306	0.221106	RXN-10423	KDUD-RXN	0.0743998
UNIPROT:Q44258	UNIPROT:W1QHB1	0.15869	RXN-10423	KDUD-RXN	0.0743998
UNIPROT:Q44258	UNIPROT:C1F1F8	0.229219	RXN-10423	KDUD-RXN	0.0743998
UNIPROT:Q44258	UNIPROT:A4AEN1	0.211587	RXN-10423	KDUD-RXN	0.0743998
UNIPROT:Q44258	UNIPROT:A0A291T4T6	0.216625	RXN-10423	KDUD-RXN	0.0743998
UNIPROT:Q44258	UNIPROT:A0A2N9M5P1	0.239186	RXN-10423	KDUD-RXN	0.0743998
UNIPROT:Q44258	UNIPROT:D4VL62	0.16962	RXN-10423	KDUD-RXN	0.0743998
UNIPROT:Q44258	UNIPROT:G2LJV0	0.20403	RXN-10423	KDUD-RXN	0.0743998
UNIPROT:Q44258	UNIPROT:A0A412G163	0.196474	RXN-10423	KDUD-RXN	0.0743998
UNIPROT:Q44258	UNIPROT:Q92MQ0	0.224181	RXN-10423	KDUD-RXN	0.0743998
UNIPROT:Q44258	UNIPROT:A0A121AFB3	0.21374	RXN-10423	KDUD-RXN	0.0743998
UNIPROT:Q44258	UNIPROT:F5Y738	0.221939	RXN-10423	KDUD-RXN	0.0743998
UNIPROT:Q44258	UNIPROT:Q82UC5	0.20403	RXN-10423	KDUD-RXN	0.0743998
UNIPROT:Q44258	UNIPROT:A0A1D7QS52	0.221662	RXN-10423	KDUD-RXN	0.0743998
UNIPROT:Q44258	UNIPROT:A4F6Q4	0.229219	RXN-10423	KDUD-RXN	0.0743998
UNIPROT:Q44258	UNIPROT:C0MA34	0.193955	RXN-10423	KDUD-RXN	0.0743998
UNIPROT:Q44258	UNIPROT:A0A2E8X480	0.224227	RXN-10423	KDUD-RXN	0.0743998
UNIPROT:Q44258	UNIPROT:A0A0N9ZQJ6	0.21883	RXN-10423	KDUD-RXN	0.0743998
UNIPROT:Q44258	UNIPROT:F7RTQ9	0.204082	RXN-10423	KDUD-RXN	0.0743998
UNIPROT:Q44258	UNIPROT:Q0RGH3	0.21066	RXN-10423	KDUD-RXN	0.0743998
UNIPROT:Q44258	UNIPROT:A0A2P9HCQ4	0.186869	RXN-10423	KDUD-RXN	0.0743998
UNIPROT:Q44258	UNIPROT:A0A1C7FCM2	0.214106	RXN-10423	KDUD-RXN	0.0743998
UNIPROT:Q44258	UNIPROT:A0A0B8NKQ4	0.202532	RXN-10423	KDUD-RXN	0.0743998
UNIPROT:Q44258	UNIPROT:E3PU64	0.20202	RXN-10423	KDUD-RXN	0.0743998
UNIPROT:Q44258	UNIPROT:A0A0D0NNH8	0.214106	RXN-10423	KDUD-RXN	0.0743998
UNIPROT:Q44258	UNIPROT:A1ZR47	0.200508	RXN-10423	KDUD-RXN	0.0743998
UNIPROT:Q44258	UNIPROT:A0A212JFN8	0.211587	RXN-10423	KDUD-RXN	0.0743998
UNIPROT:Q44258	UNIPROT:B7RQK7	0.201511	RXN-10423	KDUD-RXN	0.0743998
UNIPROT:Q44258	UNIPROT:A0A411ZDC6	0.222785	RXN-10423	KDUD-RXN	0.0743998
UNIPROT:Q44258	UNIPROT:M7NEJ9	0.21519	RXN-10423	KDUD-RXN	0.0743998
UNIPROT:Q44258	UNIPROT:A0A2N9L209	0.214106	RXN-10423	KDUD-RXN	0.0743998
UNIPROT:Q44258	UNIPROT:A0A0P8A8V8	0.212121	RXN-10423	KDUD-RXN	0.0743998
UNIPROT:Q44258	UNIPROT:A0A0P7X8S2	0.209068	RXN-10423	KDUD-RXN	0.0743998
UNIPROT:Q44258	UNIPROT:A0A380Y5N9	0.186398	RXN-10423	KDUD-RXN	0.0743998
UNIPROT:Q44258	UNIPROT:A0A157P511	0.21066	RXN-10423	KDUD-RXN	0.0743998
UNIPROT:Q44258	UNIPROT:A0A155F008	0.224181	RXN-10423	KDUD-RXN	0.0743998
UNIPROT:Q44258	UNIPROT:A0A378HH27	0.20403	RXN-10423	KDUD-RXN	0.0743998
UNIPROT:Q44258	UNIPROT:A0A109BB78	0.217391	RXN-10423	KDUD-RXN	0.0743998
UNIPROT:Q44258	UNIPROT:A9IBP7	0.201511	RXN-10423	KDUD-RXN	0.0743998
UNIPROT:Q44258	UNIPROT:A9D1S0	0.231738	RXN-10423	KDUD-RXN	0.0743998
UNIPROT:Q44258	UNIPROT:A0A1B3MNZ5	0.206549	RXN-10423	KDUD-RXN	0.0743998
UNIPROT:Q44258	UNIPROT:Q3JT32	0.20202	RXN-10423	KDUD-RXN	0.0743998
UNIPROT:Q44258	UNIPROT:A0A2P9ISF8	0.226804	RXN-10423	KDUD-RXN	0.0743998
UNIPROT:Q44258	UNIPROT:B0PHF0	0.180203	RXN-10423	KDUD-RXN	0.0743998
UNIPROT:Q44258	UNIPROT:A0A099I690	0.191436	RXN-10423	KDUD-RXN	0.0743998
UNIPROT:Q44258	UNIPROT:E0S1J7	0.191436	RXN-10423	KDUD-RXN	0.0743998
UNIPROT:Q44258	UNIPROT:A0A1R4GSD6	0.222222	RXN-10423	KDUD-RXN	0.0743998
UNIPROT:Q44258	UNIPROT:M5FJA6	0.21066	RXN-10423	KDUD-RXN	0.0743998
UNIPROT:Q44258	UNIPROT:C2JZR7	0.208651	RXN-10423	KDUD-RXN	0.0743998
UNIPROT:Q44258	UNIPROT:A0A192CAW4	0.201511	RXN-10423	KDUD-RXN	0.0743998
UNIPROT:Q44258	UNIPROT:A0A0H5C9E4	0.20403	RXN-10423	KDUD-RXN	0.0743998
UNIPROT:Q44258	UNIPROT:A0A174D3K1	0.20403	RXN-10423	KDUD-RXN	0.0743998
UNIPROT:Q44258	UNIPROT:D8J103	0.19797	RXN-10423	KDUD-RXN	0.0743998
UNIPROT:Q44258	UNIPROT:K8CQ84	0.234257	RXN-10423	KDUD-RXN	0.0743998
UNIPROT:Q44258	UNIPROT:A0A1R4G105	0.216625	RXN-10423	KDUD-RXN	0.0743998
UNIPROT:Q44258	UNIPROT:Q0RL41	0.217172	RXN-10423	KDUD-RXN	0.0743998
UNIPROT:Q44258	UNIPROT:D8DY23	0.209068	RXN-10423	KDUD-RXN	0.0743998
UNIPROT:Q44258	UNIPROT:A0A2W4GQW4	0.193955	RXN-10423	KDUD-RXN	0.0743998
UNIPROT:Q44258	UNIPROT:A0A090FD03	0.211587	RXN-10423	KDUD-RXN	0.0743998
UNIPROT:Q44258	UNIPROT:D8J129	0.219072	RXN-10423	KDUD-RXN	0.0743998
UNIPROT:Q44258	UNIPROT:F0RUI9	0.216625	RXN-10423	KDUD-RXN	0.0743998
UNIPROT:Q44258	UNIPROT:A0A369QAV2	0.193955	RXN-10423	KDUD-RXN	0.0743998
UNIPROT:Q44258	UNIPROT:A0A2X2V9W4	0.211587	RXN-10423	KDUD-RXN	0.0743998
UNIPROT:Q44258	UNIPROT:M5BSF9	0.191436	RXN-10423	KDUD-RXN	0.0743998
UNIPROT:Q44258	UNIPROT:A0A212LVE9	0.193955	RXN-10423	KDUD-RXN	0.0743998
UNIPROT:Q44258	UNIPROT:S0G552	0.191436	RXN-10423	KDUD-RXN	0.0743998
UNIPROT:Q44258	UNIPROT:A0A060QGT5	0.22108	RXN-10423	KDUD-RXN	0.0743998
UNIPROT:Q44258	UNIPROT:A0A0T6ARJ6	0.204663	RXN-10423	KDUD-RXN	0.0743998
UNIPROT:Q44258	UNIPROT:A0A3B0T819	0.21374	RXN-10423	KDUD-RXN	0.0743998
UNIPROT:Q44258	UNIPROT:F7Q8X2	0.211587	RXN-10423	KDUD-RXN	0.0743998
UNIPROT:Q44258	UNIPROT:A0A0F4FJJ9	0.214106	RXN-10423	KDUD-RXN	0.0743998
UNIPROT:Q44258	UNIPROT:A0A0B0IJW3	0.214106	RXN-10423	KDUD-RXN	0.0743998
UNIPROT:Q44258	UNIPROT:A0A1Y0UZN7	0.210127	RXN-10423	KDUD-RXN	0.0743998
UNIPROT:Q44258	UNIPROT:F4KQU0	0.211587	RXN-10423	KDUD-RXN	0.0743998
UNIPROT:Q44258	UNIPROT:A0A0W0GJY4	0.212121	RXN-10423	KDUD-RXN	0.0743998
UNIPROT:Q44258	UNIPROT:A0A369QPQ7	0.209068	RXN-10423	KDUD-RXN	0.0743998
UNIPROT:Q44258	UNIPROT:A0A2X4VSG6	0.196474	RXN-10423	KDUD-RXN	0.0743998
UNIPROT:Q44258	UNIPROT:D8IP07	0.222222	RXN-10423	KDUD-RXN	0.0743998
UNIPROT:Q44258	UNIPROT:A0A0H3KSJ9	0.219697	RXN-10423	KDUD-RXN	0.0743998
UNIPROT:Q44258	UNIPROT:A9D9F2	0.217722	RXN-10423	KDUD-RXN	0.0743998
UNIPROT:Q44258	UNIPROT:A9D7C2	0.194444	RXN-10423	KDUD-RXN	0.0743998
UNIPROT:Q44258	UNIPROT:U4E1R1	0.216625	RXN-10423	KDUD-RXN	0.0743998
UNIPROT:Q44258	UNIPROT:A0A3B1D5G7	0.209068	RXN-10423	KDUD-RXN	0.0743998
UNIPROT:Q44258	UNIPROT:C5BY10	0.219697	RXN-10423	KDUD-RXN	0.0743998
UNIPROT:Q44258	UNIPROT:A0A0E2U9Z4	0.180203	RXN-10423	KDUD-RXN	0.0743998
UNIPROT:Q44258	UNIPROT:A0A087S302	0.205063	RXN-10423	KDUD-RXN	0.0743998
UNIPROT:Q44258	UNIPROT:M7MRV6	0.218274	RXN-10423	KDUD-RXN	0.0743998
UNIPROT:Q44258	UNIPROT:A0A2K8W1I6	0.202564	RXN-10423	KDUD-RXN	0.0743998
UNIPROT:Q44258	UNIPROT:A0A0P7ZXJ4	0.194444	RXN-10423	KDUD-RXN	0.0743998
UNIPROT:Q44258	UNIPROT:F7QNJ9	0.193955	RXN-10423	KDUD-RXN	0.0743998
UNIPROT:Q44258	UNIPROT:A0A170Q9R0	0.234257	RXN-10423	KDUD-RXN	0.0743998
UNIPROT:Q44258	UNIPROT:A0A1Y5P4M7	0.228643	RXN-10423	KDUD-RXN	0.0743998
UNIPROT:Q44258	UNIPROT:A0A175BZS8	0.18136	RXN-10423	KDUD-RXN	0.0743998
UNIPROT:Q44258	UNIPROT:A0A1D7W0Q2	0.20403	RXN-10423	KDUD-RXN	0.0743998
UNIPROT:Q44258	UNIPROT:A0A241QHL1	0.244156	RXN-10423	KDUD-RXN	0.0743998
UNIPROT:Q44258	UNIPROT:A0QZR1	0.2267	RXN-10423	KDUD-RXN	0.0743998
UNIPROT:Q44258	UNIPROT:D4Z0V3	0.206186	RXN-10423	KDUD-RXN	0.0743998
UNIPROT:Q44258	UNIPROT:A0A0P7YFR1	0.214646	RXN-10423	KDUD-RXN	0.0743998
UNIPROT:Q44258	UNIPROT:Q5DB51	0.206107	RXN-10423	KDUD-RXN	0.0743998
UNIPROT:Q44258	UNIPROT:A0A0D6ICU0	0.201511	RXN-10423	KDUD-RXN	0.0743998
UNIPROT:Q44258	UNIPROT:A0A448I9Z1	0.229219	RXN-10423	KDUD-RXN	0.0743998
UNIPROT:Q44258	UNIPROT:E9RFT0	0.165829	RXN-10423	RXN-17568	0.106682
UNIPROT:Q44258	UNIPROT:E9RFT1	0.123116	RXN-10423	RXN-17568	0.106682
UNIPROT:Q44258	UNIPROT:K0E689	0.155779	RXN-10423	RXN-16495	0.312305
UNIPROT:Q44258	UNIPROT:P39315	0.19697	RXN-10423	RXN0-5387	0.0977267
UNIPROT:Q44258	UNIPROT:P40952	0.121287	RXN-10423	2-ENOATE-REDUCTASE-RXN	0.0939213
UNIPROT:Q44258	UNIPROT:D4GYG7	0.188917	RXN-10423	RXN-16597	0.886344
UNIPROT:Q44258	UNIPROT:Q9S4D5	0.207071	RXN-10423	RXN-15071	0.886694
UNIPROT:Q44258	UNIPROT:P27457	0.188917	RXN-10423	RXN-10903	0.870636
UNIPROT:Q44258	UNIPROT:Q6KZB1	0.199495	RXN-10423	RXN-15647	0.892788
UNIPROT:Q44258	UNIPROT:Q9HIN1	0.188917	RXN-10423	RXN-15647	0.892788
UNIPROT:Q44258	UNIPROT:Q9VSL3	0.21519	RXN-10423	1.5.4.1-RXN	0.88042
UNIPROT:Q44258	UNIPROT:Q67FT0	0.145363	RXN-10423	RXN-11748	0.885438
UNIPROT:Q44258	UNIPROT:A0A023J9D7	0.196474	RXN-10423	RXN-20424	0.884294
UNIPROT:Q44258	UNIPROT:V5V0R8	0.214646	RXN-10423	RXN-16658	0.884848
UNIPROT:Q44258	UNIPROT:B2DFG5	0.17207	RXN-10423	RXN-11767	0.886779
UNIPROT:Q44258	UNIPROT:Q2SYH7	0.15	RXN-10423	RXN-13776	0.899168
UNIPROT:Q44258	UNIPROT:Q8RNX9	0.183879	RXN-10423	GALLATE-DIOXYGENASE-RXN	0.883243
UNIPROT:Q44258	UNIPROT:A9WRZ1	0.195929	RXN-10423	12-ALPHA-L-FUCOSIDASE-RXN	0.886372
UNIPROT:Q44258	UNIPROT:A9WRZ2	0.188917	RXN-10423	12-ALPHA-L-FUCOSIDASE-RXN	0.886372
UNIPROT:Q44258	UNIPROT:A9CES3	0.19598	RXN-10423	RXN-18474	0.125113
UNIPROT:Q44258	UNIPROT:Q56773	0.128463	RXN-10423	RXN-11801	0.892387
UNIPROT:Q44258	UNIPROT:Q56840	0.206549	RXN-10423	1.1.1.268-RXN	0.0686997
UNIPROT:Q44258	UNIPROT:Q4X158	0.207595	RXN-10423	RXN-16211	0.897534
UNIPROT:Q44258	UNIPROT:C0SUJ9	0.212121	RXN-10423	RXN-10898	0.131077
UNIPROT:Q44258	UNIPROT:C0SUK1	0.171285	RXN-10423	RXN-10898	0.131077
UNIPROT:Q44258	UNIPROT:B0CN31	0.151134	RXN-10423	RXN-15305	0.884319
UNIPROT:Q44258	UNIPROT:Q8A710	0.211587	RXN-10423	RXN-9993	0.878858
UNIPROT:Q44258	UNIPROT:O50440	0.179293	RXN-10423	RXN-17178	0.882557
UNIPROT:Q44258	UNIPROT:B0B7P4	0.20403	RXN-10423	RXN-15730	0.880808
UNIPROT:Q44258	PID:ALG05117	0.156171	RXN-10423	RXN-17348	0.891728
UNIPROT:Q44258	PID:ALG05119	0.1575	RXN-10423	RXN-16361	0.893391
UNIPROT:Q44258	UNIPROT:Q9F7E0	0.206549	RXN-10423	CYCLOHEXANOL-DEHYDROGENASE-RXN	0.0882063
UNIPROT:Q44258	PID:BAD80839	0.18593	RXN-10423	RXN-3625	0.878543
UNIPROT:Q44258	UNIPROT:K5B7F3	0.217722	RXN-10423	RXN-21046	0.905809
UNIPROT:Q44258	UNIPROT:Q841K2	0.192893	RXN-10423	RXN-15936	0.894159
UNIPROT:Q44258	UNIPROT:C4PWA1	0.209184	RXN-10423	RXN-15417	0.88024
UNIPROT:Q44258	UNIPROT:D4GYG6	0.154613	RXN-10423	RXN-19208	0.899168
UNIPROT:Q44258	UNIPROT:I2N045	0.175879	RXN-10423	RXN-18786	0.874241
UNIPROT:Q44258	UNIPROT:O07456	0.180662	RXN-10423	R268-RXN	0.882375
UNIPROT:Q44258	UNIPROT:Q46E80	0.221662	RXN-10423	RXN-13084	0.429915
UNIPROT:Q44258	UNIPROT:F3Y662	0.156962	RXN-10423	RXN-15026	0.215557
UNIPROT:Q44258	UNIPROT:B9U6P4	0.162621	RXN-10423	RXN-15375	0.884214
UNIPROT:Q44258	UNIPROT:A0A0H3CYV1	0.224747	RXN-10423	RXN-20244	0.875542
UNIPROT:Q44258	UNIPROT:A0A0H3CV00	0.209068	RXN-10423	RXN-20244	0.875542
UNIPROT:Q44258	UNIPROT:P09347	0.155779	RXN-10423	R542-RXN	0.0586162
UNIPROT:Q44258	UNIPROT:Q9I184	0.21066	RXN-10423	RXN-11127	0.875398
UNIPROT:Q44258	UNIPROT:D7PC21	0.206549	RXN-10423	RXN-21177	0.896569
UNIPROT:Q44258	UNIPROT:D1H0I7	0.216625	RXN-10423	RXN-12773	0.893511
UNIPROT:Q44258	UNIPROT:P0CY54	0.183879	RXN-10423	RXN-8787	0.417965
UNIPROT:Q44258	UNIPROT:B0K2C3	0.204545	RXN-10423	RXN-17501	0.885205
UNIPROT:Q44258	UNIPROT:Q9L9E9	0.208122	RXN-10423	RXN-14668	0.336594
UNIPROT:Q44258	UNIPROT:Q7WSJ4	0.15443	RXN-10423	R312-RXN	0.893855
UNIPROT:Q44258	UNIPROT:G0Y288	0.149254	RXN-10423	RXN-13291	0.827758
UNIPROT:Q44258	PID:BAD80840	0.173804	RXN-10423	RXN-7656	0.879857
UNIPROT:Q44258	UNIPROT:O32429	0.163728	RXN-10423	RXN-9767	0.0977815
UNIPROT:Q44258	UNIPROT:O32433	0.135678	RXN-10423	RXN-9767	0.0977815
UNIPROT:Q44258	UNIPROT:R1F493	0.139303	RXN-10423	DIMETHYLPROPIOTHETIN-DETHIOMETHYLASE-RXN	0.890445
UNIPROT:Q44258	UNIPROT:Q3J6L0	0.20403	RXN-10423	DIMETHYLPROPIOTHETIN-DETHIOMETHYLASE-RXN	0.890445
UNIPROT:Q44258	UNIPROT:P0DN22	0.194444	RXN-10423	DIMETHYLPROPIOTHETIN-DETHIOMETHYLASE-RXN	0.890445
UNIPROT:Q44258	UNIPROT:P0DN23	0.148615	RXN-10423	DIMETHYLPROPIOTHETIN-DETHIOMETHYLASE-RXN	0.890445
UNIPROT:Q44258	UNIPROT:A3SC37	0.214106	RXN-10423	DIMETHYLPROPIOTHETIN-DETHIOMETHYLASE-RXN	0.890445
UNIPROT:Q44258	UNIPROT:P04964	0.189873	RXN-10423	RXN-14246	0.170648
UNIPROT:Q44258	UNIPROT:Q9KWR0	0.188917	RXN-10423	RXN-14246	0.170648
UNIPROT:Q44258	UNIPROT:B0L7F3	0.229219	RXN-10423	RXN-11716	0.884261
UNIPROT:Q44258	UNIPROT:A0A0H3L116	0.195431	RXN-10423	RXN-21281	0.887333
UNIPROT:Q44258	UNIPROT:E1V7W1	0.14878	RXN-10423	RXN-18397	0.890676
UNIPROT:Q44258	UNIPROT:Q0ZQ46	0.14787	RXN-10423	RXN-15074	0.890741
UNIPROT:Q44258	UNIPROT:C1FW05	0.214106	RXN-10423	RXN-18499	0.0528087
UNIPROT:Q44258	UNIPROT:D7PI17	0.138272	RXN-10423	RXN-16535	0.894953
UNIPROT:Q44258	UNIPROT:B5GRC8	0.171717	RXN-10423	RXN-18983	0.875278
UNIPROT:Q44258	UNIPROT:B9JK80	0.223881	RXN-10423	RXN-20931	0.0558174
UNIPROT:Q44258	UNIPROT:Q9K499	0.150376	RXN-10423	RXN-9349	0.877998
UNIPROT:Q44258	UNIPROT:A7NH01	0.173804	RXN-10423	RXN-12833	0.876704
UNIPROT:Q44258	UNIPROT:A4IP64	0.158924	RXN-10423	LONG-CHAIN-ALCOHOL-DEHYDROGENASE-RXN	0.0929432
UNIPROT:Q44258	UNIPROT:A4ISB9	0.149626	RXN-10423	LONG-CHAIN-ALCOHOL-DEHYDROGENASE-RXN	0.0929432
UNIPROT:Q44258	UNIPROT:E5KJ95	0.168342	RXN-10423	RXN-18070	0.87528
UNIPROT:Q44258	UNIPROT:E5KJA6	0.197468	RXN-10423	RXN-18070	0.87528
UNIPROT:Q44258	UNIPROT:Q05115	0.188917	RXN-10423	4.1.1.76-RXN	0.890573
UNIPROT:Q44258	UNIPROT:Q9KHL0	0.216625	RXN-10423	RXN-2002	0.876518
UNIPROT:Q44258	UNIPROT:C8WMP0	0.213368	RXN-10423	1.1.1.52-RXN	0.513079
UNIPROT:Q44258	UNIPROT:Q9KJF3	0.138614	RXN-10423	RXN-904	0.881062
UNIPROT:Q44258	UNIPROT:I6X5U4	0.215385	RXN-10423	RXN-17283	0.892106
UNIPROT:Q44258	UNIPROT:Q939Q9	0.130653	RXN-10423	3.1.1.75-RXN	0.898908
UNIPROT:Q44258	UNIPROT:O52553	0.229008	RXN-10423	RXN-9580	0.887971
UNIPROT:Q44258	UNIPROT:Q93NG3	0.130542	RXN-10423	1.14.13.10-RXN	0.0728227
UNIPROT:Q44258	UNIPROT:Q52472	0.198992	RXN-10423	D-THREO-ALDOSE-1-DEHYDROGENASE-RXN	0.089594
UNIPROT:Q44258	UNIPROT:Q0QLE6	0.144279	RXN-10423	METHYLITACONATE-DELTA-ISOMERASE-RXN	0.889276
UNIPROT:Q44258	UNIPROT:G3XD23	0.20403	RXN-10423	RXN-13585	0.348994
UNIPROT:Q44258	UNIPROT:C5C797	0.232323	RXN-10423	RXN-19176	0.880502
UNIPROT:Q44258	UNIPROT:Q54GH4	0.174242	RXN-10423	MYO-INOSITOL-OXYGENASE-RXN	0.892055
UNIPROT:Q44258	UNIPROT:Q8H1S0	0.163728	RXN-10423	MYO-INOSITOL-OXYGENASE-RXN	0.892055
UNIPROT:Q44258	UNIPROT:Q9QXN4	0.191919	RXN-10423	MYO-INOSITOL-OXYGENASE-RXN	0.892055
UNIPROT:Q44258	UNIPROT:P28306	0.163728	RXN-10423	RXN-17393	0.899168
UNIPROT:Q44258	UNIPROT:Q9F7D7	0.2	RXN-10423	6-HEXANOLIDE-HYDROLYSIS-RXN	0.89021
UNIPROT:Q44258	PID:ALG05135	0.192405	RXN-10423	RXN-16344	0.87433
UNIPROT:Q44258	UNIPROT:O30478	0.163728	RXN-10423	RXN-14940	0.895062
UNIPROT:Q44258	UNIPROT:A0A076N4W8	0.18136	RXN-10423	RXN-19273	0.875216
UNIPROT:Q44258	UNIPROT:Q2MJC4	0.18481	RXN-10423	RXN-11130	0.894049
UNIPROT:Q44258	UNIPROT:A0A1N7TX40	0.19697	RXN-10423	RXN-20662	0.884282
UNIPROT:Q44258	UNIPROT:Q5LS57	0.162907	RXN-10423	RXN-9736	0.888326
UNIPROT:Q44258	UNIPROT:Q4FP21	0.14	RXN-10423	RXN-9736	0.888326
UNIPROT:Q44258	UNIPROT:Q49492	0.202532	RXN-10423	RXN-12800	0.888039
UNIPROT:Q44258	UNIPROT:Q9RC92	0.1625	RXN-10423	RXN-12178	0.881059
UNIPROT:Q44258	UNIPROT:Q8E372	0.136253	RXN-10423	RXN-12178	0.881059
UNIPROT:Q44258	UNIPROT:D9XD61	0.168766	RXN-10423	RXN-18823	0.87678
UNIPROT:Q44258	UNIPROT:P00557	0.156171	RXN-10423	RXN-10030	0.885875
UNIPROT:Q44258	UNIPROT:A0A0M2AIG6	0.208122	RXN-10423	3.4.17.14-RXN	0.886979
UNIPROT:Q44258	UNIPROT:P75897	0.210797	RXN-10423	RXN-12896	0.89028
UNIPROT:Q44258	UNIPROT:Q97U96	0.1625	RXN-10423	ARABINONATE-DEHYDRATASE-RXN	0.883737
UNIPROT:Q44258	UNIPROT:Q8KN96	0.153266	RXN-10423	RXN-14782	0.883537
UNIPROT:Q44258	UNIPROT:Q8KIC8	0.130221	RXN-10423	RXN-10845	0.819249
UNIPROT:Q44258	UNIPROT:Q5V464	0.156566	RXN-10423	RXN-8960	0.878126
UNIPROT:Q44258	UNIPROT:A9WC34	0.164141	RXN-10423	RXN-8960	0.878126
UNIPROT:Q44258	UNIPROT:D4GYH2	0.191436	RXN-10423	RXN-16598	0.886344
UNIPROT:Q44258	UNIPROT:A6UQK8	0.194937	RXN-10423	2.1.1.86-RXN	0.880671
UNIPROT:Q44258	UNIPROT:P80651	0.191919	RXN-10423	2.1.1.86-RXN	0.880671
UNIPROT:Q44258	UNIPROT:O32867	0.20403	RXN-10423	2.1.1.86-RXN	0.880671
UNIPROT:Q44258	UNIPROT:A6UWI0	0.183879	RXN-10423	2.1.1.86-RXN	0.880671
UNIPROT:Q44258	UNIPROT:D3E045	0.21039	RXN-10423	2.1.1.86-RXN	0.880671
UNIPROT:Q44258	UNIPROT:Q2FRN2	0.197468	RXN-10423	2.1.1.86-RXN	0.880671
UNIPROT:Q44258	UNIPROT:P80186	0.196474	RXN-10423	2.1.1.86-RXN	0.880671
UNIPROT:Q44258	UNIPROT:O32869	0.176322	RXN-10423	2.1.1.86-RXN	0.880671
UNIPROT:Q44258	UNIPROT:Q9Y8K1	0.20403	RXN-10423	2.1.1.86-RXN	0.880671
UNIPROT:Q44258	UNIPROT:O32865	0.198992	RXN-10423	2.1.1.86-RXN	0.880671
UNIPROT:Q44258	UNIPROT:O59638	0.198992	RXN-10423	2.1.1.86-RXN	0.880671
UNIPROT:Q44258	UNIPROT:Q2NI29	0.188917	RXN-10423	2.1.1.86-RXN	0.880671
UNIPROT:Q44258	UNIPROT:Q58261	0.179028	RXN-10423	2.1.1.86-RXN	0.880671
UNIPROT:Q44258	UNIPROT:Q49176	0.209068	RXN-10423	2.1.1.86-RXN	0.880671
UNIPROT:Q44258	UNIPROT:Q58257	0.214106	RXN-10423	2.1.1.86-RXN	0.880671
UNIPROT:Q44258	UNIPROT:O27230	0.210127	RXN-10423	2.1.1.86-RXN	0.880671
UNIPROT:Q44258	UNIPROT:Q6LWZ3	0.201018	RXN-10423	2.1.1.86-RXN	0.880671
UNIPROT:Q44258	UNIPROT:O32864	0.196474	RXN-10423	2.1.1.86-RXN	0.880671
UNIPROT:Q44258	UNIPROT:Q49606	0.187342	RXN-10423	2.1.1.86-RXN	0.880671
UNIPROT:Q44258	UNIPROT:Q58258	0.205656	RXN-10423	2.1.1.86-RXN	0.880671
UNIPROT:Q44258	UNIPROT:D7DUI0	0.178841	RXN-10423	2.1.1.86-RXN	0.880671
UNIPROT:Q44258	UNIPROT:P80185	0.186398	RXN-10423	2.1.1.86-RXN	0.880671
UNIPROT:Q44258	UNIPROT:P80183	0.210127	RXN-10423	2.1.1.86-RXN	0.880671
UNIPROT:Q44258	UNIPROT:Q9WXJ9	0.214106	RXN-10423	RXN-10904	0.880574
UNIPROT:Q44258	UNIPROT:Q9I2A0	0.213198	RXN-10423	4.1.3.26-RXN	0.87951
UNIPROT:Q44258	UNIPROT:D0E8I4	0.198992	RXN-10423	RXN-15311	0.884025
UNIPROT:Q44258	UNIPROT:Q9RR27	0.207071	RXN-10423	RXN-12929	0.328299
UNIPROT:Q44258	UNIPROT:G4WJD3	0.196474	RXN-10423	RXN-8955	0.368206
UNIPROT:Q44258	UNIPROT:W8CV45	0.145729	RXN-10423	TRYPTOPHAN-DEHYDROGENASE-RXN	0.272384
UNIPROT:Q44258	UNIPROT:Q2T5S0	0.209068	RXN-10423	RXN-19533	0.892837
UNIPROT:Q44258	UNIPROT:Q56841	0.224227	RXN-10423	1.1.1.269-RXN	0.0686997
UNIPROT:Q44258	PID:AAY91990	0.183879	RXN-10423	1.1.1.43-RXN	0.0951014
UNIPROT:P08078	UNIPROT:P31112	0.178674	RXN-11099	RXN-11458	0.222953
UNIPROT:P08078	UNIPROT:P31114	0.157303	RXN-11099	RXN-11458	0.222953
UNIPROT:P08078	UNIPROT:Q50751	0.137566	RXN-11099	RXN-18273	0.228275
UNIPROT:P08078	UNIPROT:W8X5J9	0.221902	RXN-11099	RXN-20145	0.241552
UNIPROT:P08078	UNIPROT:P0A395	0.141667	RXN-11099	RXN-14860	0.901631
UNIPROT:P08078	UNIPROT:Q9AJU2	0.182058	RXN-11099	RXN-15405	0.232307
UNIPROT:P08078	UNIPROT:Q7BUE1	0.184066	RXN-11099	RXN-9578	0.871397
UNIPROT:P08078	UNIPROT:Q9ALN2	0.179293	RXN-11099	RXN-13632	0.22397
UNIPROT:P08078	UNIPROT:B5L3X1	0.187135	RXN-11099	RXN-14557	0.316969
UNIPROT:P08078	UNIPROT:A0QXD8	0.118785	RXN-11099	RXN-17764	0.925172
UNIPROT:P08078	UNIPROT:Q5V468	0.196474	RXN-11099	RXN-12168	0.215612
UNIPROT:P08078	UNIPROT:H2IFX0	0.128415	RXN-11099	RXN-15893	0.226189
UNIPROT:P08078	UNIPROT:Q5LLW6	0.193642	RXN-11099	RXN-16010	0.288326
UNIPROT:P08078	UNIPROT:P70473	0.159269	RXN-11099	RXN-9797	0.110232
UNIPROT:P08078	UNIPROT:Q2MF63	0.196185	RXN-11099	RXN-13209	0.28581
UNIPROT:P08078	UNIPROT:Q59523	0.180905	RXN-11099	RXN-15050	0.792428
UNIPROT:P08078	UNIPROT:V5TDY7	0.146132	RXN-11099	RXN-19276	0.170413
UNIPROT:P08078	UNIPROT:P14168	0.175793	RXN-11099	RXN-9159	0.872623
UNIPROT:P08078	UNIPROT:Q04809	0.179191	RXN-11099	RXN-5041	0.901808
UNIPROT:P08078	UNIPROT:Q97YM2	0.137255	RXN-11099	RXN-8776	0.922004
UNIPROT:P08078	UNIPROT:Q88J56	0.173469	RXN-11099	RXN-19190	0.288925
UNIPROT:P08078	UNIPROT:Q46N54	0.21345	RXN-11099	RXN-11728	0.92246
UNIPROT:P08078	UNIPROT:P18623	0.225434	RXN-11099	VIOMYCIN-KINASE-RXN	0.298271
UNIPROT:P08078	UNIPROT:Q5VJ89	0.145408	RXN-11099	RXN-8697	0.927913
UNIPROT:P08078	UNIPROT:P22441	0.199422	RXN-11099	N-ACYLMANNOSAMINE-1-DEHYDROGENASE-RXN	0.913815
UNIPROT:P08078	UNIPROT:Q8NMA4	0.219653	RXN-11099	ACETOINDEHYDROG-RXN	0.926738
UNIPROT:P08078	UNIPROT:Q9LBG2	0.205797	RXN-11099	RXN-19806	0.917108
UNIPROT:P08078	UNIPROT:Q59111	0.143266	RXN-11099	RXN-1082	0.219601
UNIPROT:P08078	UNIPROT:Q59112	0.16763	RXN-11099	RXN-1082	0.219601
UNIPROT:P08078	UNIPROT:P26172	0.155612	RXN-11099	RXN-17427	0.40937
UNIPROT:P08078	UNIPROT:B2J4A4	0.164265	RXN-11099	RXN-12824	0.408748
UNIPROT:P08078	UNIPROT:Q58379	0.18732	RXN-11099	RXN-11782	0.39857
UNIPROT:P08078	UNIPROT:Q2FUB2	0.186047	RXN-11099	RXN-11782	0.39857
UNIPROT:P08078	UNIPROT:Q5JHF1	0.186782	RXN-11099	RXN-11782	0.39857
UNIPROT:P08078	UNIPROT:Q939Q3	0.151862	RXN-11099	RXN-16566	0.871545
UNIPROT:P08078	UNIPROT:Q9RFR0	0.19598	RXN-11099	RXN-8849	0.344304
UNIPROT:P08078	UNIPROT:F1CWE5	0.184438	RXN-11099	RXN-16588	0.159243
UNIPROT:P08078	UNIPROT:P16689	0.163158	RXN-11099	RXN-17955	0.234896
UNIPROT:P08078	UNIPROT:V5TDH1	0.140805	RXN-11099	RXN-19287	0.161539
UNIPROT:P08078	UNIPROT:P76472	0.193642	RXN-11099	RXN0-5409	0.0957275
UNIPROT:P08078	UNIPROT:Q9Z9I9	0.133903	RXN-11099	RXN-10896	0.169482
UNIPROT:P08078	UNIPROT:Q56863	0.172414	RXN-11099	RXN-21377	0.87149
UNIPROT:P08078	UNIPROT:B1W019	0.159091	RXN-11099	RXN-12774	0.404551
UNIPROT:P08078	UNIPROT:Q0ZQ43	0.16474	RXN-11099	RXN-15080	0.294098
UNIPROT:P08078	UNIPROT:E7BBN5	0.161017	RXN-11099	RXN-18505	0.228251
UNIPROT:P08078	UNIPROT:Q9RA05	0.202312	RXN-11099	RXN-9401	0.16637
UNIPROT:P08078	UNIPROT:A0A348BF02	0.151832	RXN-11099	RXN-20901	0.291405
UNIPROT:P08078	UNIPROT:Q715L4	0.181556	RXN-11099	PHLORETIN-HYDROLASE-RXN	0.163585
UNIPROT:P08078	UNIPROT:L7RFF8	0.152672	RXN-11099	RXN-20921	0.169512
UNIPROT:P08078	UNIPROT:L7VFM4	0.16092	RXN-11099	RXN-15576	0.202056
UNIPROT:P08078	UNIPROT:A0A0H3PBA7	0.151515	RXN-11099	RXN-16162	0.861281
UNIPROT:P08078	UNIPROT:Q9EX73	0.202857	RXN-11099	RXN-9432	0.149185
UNIPROT:P08078	UNIPROT:C7PLV2	0.146974	RXN-11099	RXN-11906	0.398618
UNIPROT:P08078	UNIPROT:M1VDX3	0.126761	RXN-11099	RXN-15708	0.339203
UNIPROT:P08078	UNIPROT:Q92CR1	0.204611	RXN-11099	RXN-19372	0.374645
UNIPROT:P08078	UNIPROT:D7PHZ7	0.204611	RXN-11099	RXN-16581	0.250319
UNIPROT:P08078	UNIPROT:E3PY99	0.115493	RXN-11099	RXN-18500	0.92955
UNIPROT:P08078	UNIPROT:Q9ZET3	0.150142	RXN-11099	RXN-17588	0.926625
UNIPROT:P08078	UNIPROT:Q8RR26	0.193642	RXN-11099	RXN-21004	0.219694
UNIPROT:P08078	UNIPROT:Q8RR28	0.193084	RXN-11099	RXN-21004	0.219694
UNIPROT:P08078	UNIPROT:Q8KN33	0.155172	RXN-11099	RXN0-7010	0.169123
UNIPROT:P08078	UNIPROT:P42620	0.161932	RXN-11099	RXN0-7010	0.169123
UNIPROT:P08078	UNIPROT:D2KTX1	0.235465	RXN-11099	RXN-17143	0.919111
UNIPROT:P08078	UNIPROT:Q2LXU6	0.187861	RXN-11099	4.2.1.100-RXN	0.241445
UNIPROT:P08078	UNIPROT:O87873	0.202312	RXN-11099	4.2.1.100-RXN	0.241445
UNIPROT:P08078	UNIPROT:A0A0H5BN57	0.146132	RXN-11099	RXN-18984	0.289928
UNIPROT:P08078	UNIPROT:A0A0H5BN61	0.181818	RXN-11099	RXN-18984	0.289928
UNIPROT:P08078	UNIPROT:Q88JX9	0.204611	RXN-11099	RXN-2464	0.209197
UNIPROT:P08078	UNIPROT:Q9AQI0	0.193084	RXN-11099	RXN-2464	0.209197
UNIPROT:P08078	UNIPROT:P40011	0.207493	RXN-11099	RXN-2464	0.209197
UNIPROT:P08078	UNIPROT:A5W059	0.201729	RXN-11099	RXN-2464	0.209197
UNIPROT:P08078	UNIPROT:Q9KBI9	0.186047	RXN-11099	RXN-2464	0.209197
UNIPROT:P08078	UNIPROT:Q194Q5	0.219941	RXN-11099	RXN-12932	0.869182
UNIPROT:P08078	UNIPROT:O24721	0.169666	RXN-11099	1.13.11.38-RXN	0.172373
UNIPROT:P08078	UNIPROT:B0FXI4	0.190202	RXN-11099	RXN-3941	0.887263
UNIPROT:P08078	UNIPROT:A0A0A1GNF2	0.179191	RXN-11099	RXN-16711	0.153321
UNIPROT:P08078	UNIPROT:P22868	0.159664	RXN-11099	METHANE-MONOOXYGENASE-RXN	0.928371
UNIPROT:P08078	UNIPROT:Q53563	0.166197	RXN-11099	METHANE-MONOOXYGENASE-RXN	0.928371
UNIPROT:P08078	UNIPROT:P27354	0.186869	RXN-11099	METHANE-MONOOXYGENASE-RXN	0.928371
UNIPROT:P08078	UNIPROT:P18798	0.171795	RXN-11099	METHANE-MONOOXYGENASE-RXN	0.928371
UNIPROT:P08078	UNIPROT:Q8G9L1	0.176	RXN-11099	RXN-10123	0.168814
UNIPROT:P08078	UNIPROT:Q9AH03	0.151261	RXN-11099	RXN-16305	0.28065
UNIPROT:P08078	UNIPROT:Q2VEQ7	0.15942	RXN-11099	1.1.1.272-RXN	0.927844
UNIPROT:P08078	UNIPROT:G5CN54	0.187861	RXN-11099	RXN-14019	0.801583
UNIPROT:P08078	UNIPROT:O24963	0.17052	RXN-11099	RXN-10622	0.246496
UNIPROT:P08078	UNIPROT:Q9KXN1	0.212644	RXN-11099	RXN-10622	0.246496
UNIPROT:P08078	UNIPROT:A9CEQ8	0.168865	RXN-11099	RXN-15907	0.21813
UNIPROT:P08078	UNIPROT:Q9L4X0	0.177665	RXN-11099	RXN-16254	0.857724
UNIPROT:P08078	UNIPROT:D2Z024	0.209302	RXN-11099	RXN-12537	0.194302
UNIPROT:P08078	UNIPROT:Q54528	0.184438	RXN-11099	RXN-14863	0.157991
UNIPROT:P08078	UNIPROT:P95137	0.16185	RXN-11099	RXN-17284	0.220528
UNIPROT:P08078	UNIPROT:I6X9J4	0.181556	RXN-11099	1.13.11.14-RXN	0.184917
UNIPROT:P08078	UNIPROT:Q51976	0.16092	RXN-11099	1.13.11.14-RXN	0.184917
UNIPROT:P08078	UNIPROT:Q51718	0.195965	RXN-11099	3.1.1.76-RXN	0.110232
UNIPROT:P08078	UNIPROT:Q8KQ22	0.190202	RXN-11099	3.1.1.76-RXN	0.110232
UNIPROT:P08078	UNIPROT:Q643C1	0.153846	RXN-11099	RXN-14541	0.212053
UNIPROT:P08078	PID:BAV89210	0.190202	RXN-11099	RXN0-5180	0.235681
UNIPROT:P08078	UNIPROT:Q948Q0	0.15562	RXN-11099	RXN0-5180	0.235681
UNIPROT:P08078	UNIPROT:E2GIN1	0.199422	RXN-11099	RXN-13635	0.229613
UNIPROT:P08078	UNIPROT:C9K1X5	0.16474	RXN-11099	RXN-15429	0.354995
UNIPROT:P08078	UNIPROT:P07639	0.172973	RXN-11099	RXN-20673	0.172057
UNIPROT:P08078	UNIPROT:P39644	0.201729	RXN-11099	RXN-16298	0.92955
UNIPROT:P08078	UNIPROT:F2RB78	0.132565	RXN-11099	RXN-20193	0.897137
UNIPROT:P08078	UNIPROT:Q53U11	0.167568	RXN-11099	RXN-13176	0.285761
UNIPROT:P08078	UNIPROT:P29379	0.211144	RXN-11099	R310-RXN	0.108195
UNIPROT:P08078	UNIPROT:Q53117	0.207493	RXN-11099	R310-RXN	0.108195
UNIPROT:P08078	UNIPROT:P21220	0.190616	RXN-11099	R310-RXN	0.108195
UNIPROT:P08078	UNIPROT:P97052	0.211144	RXN-11099	R310-RXN	0.108195
UNIPROT:P08078	UNIPROT:P27763	0.198847	RXN-11099	R310-RXN	0.108195
UNIPROT:P08078	UNIPROT:P97051	0.22029	RXN-11099	R310-RXN	0.108195
UNIPROT:P08078	UNIPROT:P29378	0.213256	RXN-11099	R310-RXN	0.108195
UNIPROT:P08078	UNIPROT:P13448	0.211594	RXN-11099	R310-RXN	0.108195
UNIPROT:P08078	UNIPROT:B4ER98	0.213256	RXN-11099	RXN-20237	0.241355
UNIPROT:P08078	UNIPROT:A9CEQ7	0.168605	RXN-11099	RXN-15901	0.144262
UNIPROT:P08078	UNIPROT:O87697	0.141333	RXN-11099	RXN-8763	0.181848
UNIPROT:P08078	UNIPROT:Q58544	0.12931	RXN-11099	RXN-8763	0.181848
UNIPROT:P08078	UNIPROT:Q05631	0.141667	RXN-11099	RXN-8763	0.181848
UNIPROT:P08078	UNIPROT:A0A286SC67	0.127424	RXN-11099	RXN-20259	0.221697
UNIPROT:P08078	UNIPROT:Q9AJU0	0.210375	RXN-11099	RXN-15403	0.222753
UNIPROT:P08078	UNIPROT:Q9RAH6	0.211594	RXN-11099	RXN-17837	0.209561
UNIPROT:P08078	UNIPROT:P0AE22	0.188406	RXN-11099	RXN-14534	0.208565
UNIPROT:P08078	UNIPROT:Q9ALN3	0.181556	RXN-11099	RXN-13630	0.226018
UNIPROT:P08078	UNIPROT:I6YER9	0.210983	RXN-11099	RXN-15423	0.198369
UNIPROT:P08078	UNIPROT:A7B3K3	0.203488	RXN-11099	RXN-17412	0.886009
UNIPROT:P08078	UNIPROT:E4N7E5	0.171014	RXN-11099	RXN-18790	0.369911
UNIPROT:P08078	UNIPROT:H2E7T7	0.158311	RXN-11099	RXN-13283	0.227361
UNIPROT:P08078	UNIPROT:Q8GRC8	0.149871	RXN-11099	RXN-11768	0.189367
UNIPROT:P08078	UNIPROT:Q9ZFV4	0.184971	RXN-11099	RXN-19333	0.17506
UNIPROT:P08078	UNIPROT:E5Y946	0.157623	RXN-11099	RXN-20702	0.109168
UNIPROT:P08078	UNIPROT:Q82RR7	0.150568	RXN-11099	RXN-12831	0.374149
UNIPROT:P08078	UNIPROT:Q00870	0.144044	RXN-11099	KIEVITONE-HYDRATASE-RXN	0.1583
UNIPROT:P08078	UNIPROT:F8J3H2	0.16474	RXN-11099	RXN-17563	0.273254
UNIPROT:P08078	UNIPROT:Q8T882	0.161616	RXN-11099	TAUROPINE-DEHYDROGENASE-RXN	0.907441
UNIPROT:P08078	UNIPROT:Q60FC7	0.176966	RXN-11099	TAUROPINE-DEHYDROGENASE-RXN	0.907441
UNIPROT:P08078	UNIPROT:Q56778	0.20977	RXN-11099	RXN-11802	0.20489
UNIPROT:P08078	UNIPROT:P0DOV6	0.194842	RXN-11099	RXN-17095	0.157901
UNIPROT:P08078	UNIPROT:O34707	0.148649	RXN-11099	RXN-13337	0.319082
UNIPROT:P08078	UNIPROT:Q6XBI8	0.11831	RXN-11099	RXN-17580	0.930028
UNIPROT:P08078	UNIPROT:E1XUJ2	0.165829	RXN-11099	RXN-12335	0.118605
UNIPROT:P08078	UNIPROT:D0ZLR3	0.172043	RXN-11099	RXN-14730	0.209731
UNIPROT:P08078	UNIPROT:A9CK30	0.196532	RXN-11099	RXN-9936	0.240555
UNIPROT:P08078	UNIPROT:D7R619	0.174785	RXN-11099	RXN-12902	0.199322
UNIPROT:P08078	UNIPROT:D7R620	0.204611	RXN-11099	RXN-12902	0.199322
UNIPROT:P08078	UNIPROT:A2SP37	0.161202	RXN-11099	RXN-17613	0.922508
UNIPROT:P08078	UNIPROT:Q59M69	0.142857	RXN-11099	4.2.1.93-RXN	0.360302
UNIPROT:P08078	UNIPROT:C5Y210	0.138743	RXN-11099	4.2.1.93-RXN	0.360302
UNIPROT:P08078	UNIPROT:P36059	0.12894	RXN-11099	4.2.1.93-RXN	0.360302
UNIPROT:P08078	UNIPROT:A9RY03	0.141643	RXN-11099	4.2.1.93-RXN	0.360302
UNIPROT:P08078	UNIPROT:Q9VVW8	0.167147	RXN-11099	4.2.1.93-RXN	0.360302
UNIPROT:P08078	UNIPROT:Q5K8L4	0.131868	RXN-11099	4.2.1.93-RXN	0.360302
UNIPROT:P08078	UNIPROT:E3LAQ9	0.181818	RXN-11099	4.2.1.93-RXN	0.360302
UNIPROT:P08078	UNIPROT:Q5B0D6	0.162162	RXN-11099	4.2.1.93-RXN	0.360302
UNIPROT:P08078	UNIPROT:F6RCC2	0.127072	RXN-11099	4.2.1.93-RXN	0.360302
UNIPROT:P08078	UNIPROT:C0NFV9	0.167568	RXN-11099	4.2.1.93-RXN	0.360302
UNIPROT:P08078	UNIPROT:B7PBI5	0.15896	RXN-11099	4.2.1.93-RXN	0.360302
UNIPROT:P08078	UNIPROT:E0VSF4	0.172911	RXN-11099	4.2.1.93-RXN	0.360302
UNIPROT:P08078	PID:BAA91797	0.206549	RXN-11099	4.2.1.93-RXN	0.360302
UNIPROT:P08078	UNIPROT:C4LZV8	0.16185	RXN-11099	4.2.1.93-RXN	0.360302
UNIPROT:P08078	UNIPROT:Q17NP0	0.153846	RXN-11099	4.2.1.93-RXN	0.360302
UNIPROT:P08078	UNIPROT:A7RRZ8	0.154696	RXN-11099	4.2.1.93-RXN	0.360302
UNIPROT:P08078	UNIPROT:O94347	0.148148	RXN-11099	4.2.1.93-RXN	0.360302
UNIPROT:P08078	UNIPROT:B7FXE8	0.195467	RXN-11099	4.2.1.93-RXN	0.360302
UNIPROT:P08078	UNIPROT:Q4P219	0.135211	RXN-11099	4.2.1.93-RXN	0.360302
UNIPROT:P08078	UNIPROT:A8X354	0.180516	RXN-11099	4.2.1.93-RXN	0.360302
UNIPROT:P08078	UNIPROT:F4NZ38	0.166667	RXN-11099	4.2.1.93-RXN	0.360302
UNIPROT:P08078	UNIPROT:A8N8Z0	0.139601	RXN-11099	4.2.1.93-RXN	0.360302
UNIPROT:P08078	UNIPROT:Q7SHU9	0.128134	RXN-11099	4.2.1.93-RXN	0.360302
UNIPROT:P08078	UNIPROT:Q9XB59	0.201149	RXN-11099	RXN-8949	0.217806
UNIPROT:P08078	UNIPROT:Q05182	0.15562	RXN-11099	PHTHALATE-45-DIOXYGENASE-RXN	0.9053
UNIPROT:P08078	UNIPROT:P55818	0.16474	RXN-11099	RXN-2883	0.790427
UNIPROT:P08078	UNIPROT:O85012	0.196532	RXN-11099	RXN-2883	0.790427
UNIPROT:P08078	UNIPROT:Q5U914	0.215743	RXN-11099	RXN-11984	0.159271
UNIPROT:P08078	UNIPROT:A0A4Y1MT04	0.179293	RXN-11099	GLUTARATE--COA-LIGASE-RXN	0.349104
UNIPROT:P08078	UNIPROT:A9WLH9	0.207493	RXN-11099	GLUTARATE--COA-LIGASE-RXN	0.349104
UNIPROT:P08078	UNIPROT:S7SR96	0.182045	RXN-11099	GLUTARATE--COA-LIGASE-RXN	0.349104
UNIPROT:P08078	UNIPROT:P39849	0.163488	RXN-11099	RXN-8581	0.930645
UNIPROT:P08078	UNIPROT:O52791	0.172603	RXN-11099	1.13.11.46-RXN	0.206732
UNIPROT:P08078	UNIPROT:Q9C6I4	0.11396	RXN-11099	RXN-115	0.226451
UNIPROT:P08078	PID:AAN87571	0.126074	RXN-11099	RXN-115	0.226451
UNIPROT:P08078	UNIPROT:Q9SQ80	0.146132	RXN-11099	RXN-115	0.226451
UNIPROT:P08078	UNIPROT:Q5ZA21	0.150538	RXN-11099	RXN-115	0.226451
UNIPROT:P08078	PID:O64692	0.123209	RXN-11099	RXN-115	0.226451
UNIPROT:P08078	PID:AAN87572	0.151429	RXN-11099	RXN-115	0.226451
UNIPROT:P08078	UNIPROT:Q8S0S6	0.155172	RXN-11099	RXN-115	0.226451
UNIPROT:P08078	UNIPROT:O49561	0.153846	RXN-11099	RXN-115	0.226451
UNIPROT:P08078	UNIPROT:Q9C7Z1	0.148688	RXN-11099	RXN-115	0.226451
UNIPROT:P08078	UNIPROT:Q7XP65	0.119444	RXN-11099	RXN-115	0.226451
UNIPROT:P08078	UNIPROT:Q8LGZ9	0.125	RXN-11099	RXN-115	0.226451
UNIPROT:P08078	UNIPROT:Q841K9	0.146893	RXN-11099	RXN-15942	0.305194
UNIPROT:P08078	UNIPROT:P15006	0.110169	RXN-11099	RXN0-2941	0.413395
UNIPROT:P08078	UNIPROT:Q83WF5	0.182519	RXN-11099	RXN-15053	0.882016
UNIPROT:P08078	UNIPROT:A0A452CSY6	0.14121	RXN-11099	2.7.99.1-RXN	0.153789
UNIPROT:P08078	UNIPROT:P00458	0.180516	RXN-11099	NITROGENASE-FLAVODOXIN-RXN	0.371555
UNIPROT:P08078	UNIPROT:P00459	0.17765	RXN-11099	NITROGENASE-FLAVODOXIN-RXN	0.371555
UNIPROT:P08078	UNIPROT:P0A8T1	0.168605	RXN-11099	RXN0-5419	0.335086
UNIPROT:P08078	UNIPROT:B2J8P8	0.163265	RXN-11099	RXN-14462	0.366153
UNIPROT:P08078	UNIPROT:Q9I6K2	0.180516	RXN-11099	GUANIDINOPROPIONASE-RXN	0.0874354
UNIPROT:P08078	UNIPROT:Q83YH7	0.158163	RXN-11099	RXN-10668	0.218825
UNIPROT:P08078	UNIPROT:O87871	0.154472	RXN-11099	HADTHAUERA-RXN	0.81208
UNIPROT:P08078	UNIPROT:A9IE89	0.199422	RXN-11099	RXN-13638	0.220934
UNIPROT:P08078	UNIPROT:P37749	0.138329	RXN-11099	RXN0-5210	0.327025
UNIPROT:P08078	UNIPROT:Q9F834	0.168571	RXN-11099	RXN-13660	0.866458
UNIPROT:P08078	UNIPROT:P27099	0.162667	RXN-11099	RXN-18360	0.175043
UNIPROT:P08078	UNIPROT:Q8GMW5	0.215517	RXN-11099	RXN-8747	0.109947
UNIPROT:P08078	UNIPROT:E3UBL6	0.205202	RXN-11099	RXN-15498	0.140989
UNIPROT:P08078	UNIPROT:P73538	0.142857	RXN-11099	RXN-17473	0.200788
UNIPROT:P08078	UNIPROT:P12996	0.156863	RXN-11099	RXN-17473	0.200788
UNIPROT:P08078	UNIPROT:Q70GK9	0.176301	RXN-11099	2.5.1.63-RXN	0.18647
UNIPROT:P08078	UNIPROT:J9QS25	0.140162	RXN-11099	RXN-13763	0.404551
UNIPROT:P08078	UNIPROT:B2J1M1	0.212644	RXN-11099	RXN-13286	0.121983
UNIPROT:P08078	UNIPROT:Q6J1Z5	0.204611	RXN-11099	RXN-8836	0.145034
UNIPROT:P08078	UNIPROT:Q6J1Z6	0.148997	RXN-11099	RXN-8836	0.145034
UNIPROT:P08078	UNIPROT:P94681	0.210375	RXN-11099	SYDDEHYD-RXN	0.921325
UNIPROT:P08078	UNIPROT:P0DOV8	0.202899	RXN-11099	RXN-17098	0.187554
UNIPROT:P08078	UNIPROT:E4MYY0	0.150142	RXN-11099	RXN-18944	0.384918
UNIPROT:P08078	UNIPROT:Q6TFC6	0.18732	RXN-11099	RXN-14735	0.301296
UNIPROT:P08078	UNIPROT:P30347	0.179191	RXN-11099	RXN-10902	0.23341
UNIPROT:P08078	UNIPROT:Q0PCR8	0.174026	RXN-11099	RXN-14755	0.441819
UNIPROT:P08078	UNIPROT:O82872	0.152231	RXN-11099	4.1.2.42-RXN	0.154323
UNIPROT:P08078	UNIPROT:E3EJK4	0.151685	RXN-11099	RXN-15664	0.917161
UNIPROT:P08078	UNIPROT:A7Z0T4	0.140449	RXN-11099	RXN-15664	0.917161
UNIPROT:P08078	UNIPROT:Q59093	0.198847	RXN-11099	RXN-10083	0.215291
UNIPROT:P08078	UNIPROT:P00632	0.182081	RXN-11099	RXN-10083	0.215291
UNIPROT:P08078	UNIPROT:Q0P8I6	0.140449	RXN-11099	RXN-16169	0.861281
UNIPROT:P08078	UNIPROT:P48635	0.195489	RXN-11099	RXN-12926	0.848874
UNIPROT:P08078	UNIPROT:Q8G9L3	0.200581	RXN-11099	RXN-10118	0.186388
UNIPROT:P08078	UNIPROT:D2PPM8	0.17268	RXN-11099	RXN-18147	0.233366
UNIPROT:P08078	UNIPROT:Q9LBJ0	0.216138	RXN-11099	RXN-19530	0.274857
UNIPROT:P08078	UNIPROT:Q6E7F2	0.157593	RXN-11099	1.1.1.266-RXN	0.870869
UNIPROT:P08078	UNIPROT:A2BD24	0.144092	RXN-11099	1.1.1.266-RXN	0.870869
UNIPROT:P08078	UNIPROT:Q51979	0.230321	RXN-11099	RXN-667	0.181402
UNIPROT:P08078	UNIPROT:M1T9N7	0.171429	RXN-11099	RXN-11456	0.335086
UNIPROT:P08078	UNIPROT:D5FKJ3	0.145658	RXN-11099	RXN-11456	0.335086
UNIPROT:P08078	UNIPROT:Q9F7D8	0.160112	RXN-11099	6-HYDROXYHEXANOATE-OXIDATION-RXN	0.918451
UNIPROT:P08078	UNIPROT:O31041	0.198847	RXN-11099	RXN-21079	0.121879
UNIPROT:P08078	UNIPROT:B3TZD8	0.15544	RXN-11099	RXN-15363	0.349057
UNIPROT:P08078	UNIPROT:B3TZD9	0.193084	RXN-11099	RXN-15363	0.349057
UNIPROT:P08078	UNIPROT:Q8ZKR2	0.146974	RXN-11099	RXN-19750	0.390546
UNIPROT:P08078	UNIPROT:P0ABQ2	0.17052	RXN-11099	RXN0-5289	0.924622
UNIPROT:P08078	UNIPROT:P77161	0.195402	RXN-11099	RXN0-5289	0.924622
UNIPROT:P08078	UNIPROT:Q9I5I6	0.16092	RXN-11099	RXN-16008	0.921017
UNIPROT:P08078	UNIPROT:Q3SLJ4	0.195965	RXN-11099	RXN-9230	0.268594
UNIPROT:P08078	UNIPROT:Q3IHW5	0.181034	RXN-11099	RXN-9230	0.268594
UNIPROT:P08078	UNIPROT:A1KSZ7	0.170029	RXN-11099	RXN-9230	0.268594
UNIPROT:P08078	UNIPROT:Q6D9I8	0.172911	RXN-11099	RXN-9230	0.268594
UNIPROT:P08078	UNIPROT:Q499N4	0.15508	RXN-11099	RXN-9230	0.268594
UNIPROT:P08078	UNIPROT:Q6F9N8	0.210375	RXN-11099	RXN-9230	0.268594
UNIPROT:P08078	UNIPROT:Q3IZ43	0.167139	RXN-11099	RXN-9230	0.268594
UNIPROT:P08078	UNIPROT:A2SMA7	0.167147	RXN-11099	RXN-9230	0.268594
UNIPROT:P08078	UNIPROT:P32378	0.13172	RXN-11099	RXN-9230	0.268594
UNIPROT:P08078	UNIPROT:Q8DD49	0.193084	RXN-11099	RXN-9230	0.268594
UNIPROT:P08078	UNIPROT:A4SZT5	0.196532	RXN-11099	RXN-9230	0.268594
UNIPROT:P08078	UNIPROT:Q1GXB3	0.195965	RXN-11099	RXN-9230	0.268594
UNIPROT:P08078	UNIPROT:A5CXV6	0.20977	RXN-11099	RXN-9230	0.268594
UNIPROT:P08078	UNIPROT:Q8PQD5	0.182081	RXN-11099	RXN-9230	0.268594
UNIPROT:P08078	UNIPROT:Q10252	0.134247	RXN-11099	RXN-9230	0.268594
UNIPROT:P08078	UNIPROT:Q298G6	0.193467	RXN-11099	RXN-9230	0.268594
UNIPROT:P08078	UNIPROT:Q82TP2	0.18732	RXN-11099	RXN-9230	0.268594
UNIPROT:P08078	UNIPROT:Q47J11	0.184438	RXN-11099	RXN-9230	0.268594
UNIPROT:P08078	UNIPROT:Q0A5V9	0.179191	RXN-11099	RXN-9230	0.268594
UNIPROT:P08078	UNIPROT:Q1Q996	0.175793	RXN-11099	RXN-9230	0.268594
UNIPROT:P08078	UNIPROT:Q5P5M0	0.176301	RXN-11099	RXN-9230	0.268594
UNIPROT:P08078	UNIPROT:Q6LVS3	0.176301	RXN-11099	RXN-9230	0.268594
UNIPROT:P08078	UNIPROT:Q3JBS8	0.198276	RXN-11099	RXN-9230	0.268594
UNIPROT:P08078	UNIPROT:Q2NR07	0.2	RXN-11099	RXN-9230	0.268594
UNIPROT:P08078	UNIPROT:A1T087	0.206897	RXN-11099	RXN-9230	0.268594
UNIPROT:P08078	UNIPROT:Q1LJ64	0.182081	RXN-11099	RXN-9230	0.268594
UNIPROT:P08078	UNIPROT:Q2SNV5	0.181556	RXN-11099	RXN-9230	0.268594
UNIPROT:P08078	UNIPROT:Q8I7J4	0.148352	RXN-11099	RXN-9230	0.268594
UNIPROT:P08078	UNIPROT:Q5QUP3	0.184438	RXN-11099	RXN-9230	0.268594
UNIPROT:P08078	UNIPROT:Q21S73	0.184971	RXN-11099	RXN-9230	0.268594
UNIPROT:P08078	UNIPROT:B0U2A2	0.17971	RXN-11099	RXN-9230	0.268594
UNIPROT:P08078	UNIPROT:Q494A7	0.16474	RXN-11099	RXN-9230	0.268594
UNIPROT:P08078	UNIPROT:Q5WWR8	0.172911	RXN-11099	RXN-9230	0.268594
UNIPROT:P08078	UNIPROT:Q0VTA7	0.204611	RXN-11099	RXN-9230	0.268594
UNIPROT:P08078	UNIPROT:Q31DM4	0.172911	RXN-11099	RXN-9230	0.268594
UNIPROT:P08078	UNIPROT:A9KGW7	0.184438	RXN-11099	RXN-9230	0.268594
UNIPROT:P08078	UNIPROT:Q1QSG2	0.212644	RXN-11099	RXN-9230	0.268594
UNIPROT:P08078	UNIPROT:Q2Y5S3	0.17341	RXN-11099	RXN-9230	0.268594
UNIPROT:P08078	PID:AAH20728	0.175711	RXN-11099	RXN-9230	0.268594
UNIPROT:P08078	UNIPROT:A1WKC0	0.190202	RXN-11099	RXN-9230	0.268594
UNIPROT:P08078	UNIPROT:A4VGN3	0.167147	RXN-11099	RXN-9230	0.268594
UNIPROT:P08078	UNIPROT:Q608Z9	0.152738	RXN-11099	RXN-9230	0.268594
UNIPROT:P08078	UNIPROT:Q12S01	0.178161	RXN-11099	RXN-9230	0.268594
UNIPROT:P08078	UNIPROT:Q55500	0.204611	RXN-11099	RXN-9230	0.268594
UNIPROT:P08078	UNIPROT:B0BPA2	0.193084	RXN-11099	RXN-9230	0.268594
UNIPROT:P08078	UNIPROT:Q21DY7	0.184971	RXN-11099	RXN-9230	0.268594
UNIPROT:P08078	UNIPROT:Q8KQL2	0.155125	RXN-11099	RXN-11107	0.91708
UNIPROT:P08078	UNIPROT:Q92V74	0.182058	RXN-11099	RXN-17958	0.236302
UNIPROT:P08078	UNIPROT:Q84CG1	0.191816	RXN-11099	RXN-14636	0.110232
UNIPROT:P08078	UNIPROT:P27240	0.187135	RXN-11099	RXN0-5123	0.226417
UNIPROT:P08078	UNIPROT:P18204	0.172589	RXN-11099	INDOLEACETATE--LYSINE-LIGASE-RXN	0.369909
UNIPROT:P08078	UNIPROT:P0DPK6	0.130556	RXN-11099	RXN-18785	0.33916
UNIPROT:P08078	UNIPROT:Q54376	0.146974	RXN-11099	RXN-21205	0.287817
UNIPROT:P08078	UNIPROT:O07457	0.195965	RXN-11099	R267-RXN	0.814679
UNIPROT:P08078	UNIPROT:Q70KH3	0.219653	RXN-11099	RXN-20209	0.25622
UNIPROT:P08078	UNIPROT:Q83WF2	0.16792	RXN-11099	RXN-12801	0.237003
UNIPROT:P08078	UNIPROT:Q46856	0.18509	RXN-11099	RXN0-6487	0.927029
UNIPROT:P08078	UNIPROT:D2B747	0.16954	RXN-11099	RXN-18824	0.377912
UNIPROT:P08078	UNIPROT:A4UVY1	0.206997	RXN-11099	RXN-8847	0.91676
UNIPROT:P08078	UNIPROT:Q8KES3	0.221902	RXN-11099	RXN-13222	0.90857
UNIPROT:P08078	UNIPROT:Q09927	0.193642	RXN-11099	RXN-19375	0.353915
UNIPROT:P08078	UNIPROT:E9P8D2	0.206997	RXN-11099	RXN-19375	0.353915
UNIPROT:P08078	UNIPROT:O81884	0.157593	RXN-11099	RXN-1884	0.916686
UNIPROT:P08078	UNIPROT:B9W4V6	0.168	RXN-11099	RXN-11814	0.136238
UNIPROT:P08078	UNIPROT:P95748	0.213873	RXN-11099	RXN-12772	0.201486
UNIPROT:P08078	UNIPROT:Q44297	0.175342	RXN-11099	1.5.1.28-RXN	0.900516
UNIPROT:P08078	UNIPROT:P23133	0.202312	RXN-11099	2-OH-6-OXOHEPTA-2-4-DIENOATE-HYDR-RXN	0.147294
UNIPROT:P08078	UNIPROT:Q4JZE6	0.208092	RXN-11099	RXN-13745	0.269187
UNIPROT:P08078	UNIPROT:G2IMF2	0.156069	RXN-11099	RXN-19408	0.872672
UNIPROT:P08078	UNIPROT:B6EHB9	0.133903	RXN-11099	RXN-15654	0.204218
UNIPROT:P08078	UNIPROT:A0A9I9	0.177945	RXN-11099	STROMBINE-DEHYDROGENASE-RXN	0.923967
UNIPROT:P08078	UNIPROT:Q0P9D3	0.179949	RXN-11099	RXN-12812	0.173327
UNIPROT:P08078	UNIPROT:A0A0D4BS80	0.225806	RXN-11099	RXN-17532	0.163025
UNIPROT:P08078	UNIPROT:E9NPJ4	0.170029	RXN-11099	RXN-20454	0.210469
UNIPROT:P08078	UNIPROT:P72140	0.133333	RXN-11099	RXN-14783	0.110232
UNIPROT:P08078	UNIPROT:Q9I1Q2	0.15601	RXN-11099	RXN-15590	0.218096
UNIPROT:P08078	UNIPROT:M1V9Q0	0.140162	RXN-11099	RXN-15706	0.341874
UNIPROT:P08078	UNIPROT:Q56779	0.202312	RXN-11099	RXN-11792	0.320022
UNIPROT:P08078	UNIPROT:Q44577	0.210983	RXN-11099	RXN-11792	0.320022
UNIPROT:P08078	UNIPROT:Q8RL55	0.17341	RXN-11099	RXN-19875	0.171323
UNIPROT:P08078	UNIPROT:P50197	0.221902	RXN-11099	LINC-RXN	0.912024
UNIPROT:P08078	UNIPROT:A0A0M3WRK0	0.195965	RXN-11099	RXN-17198	0.0984942
UNIPROT:P08078	UNIPROT:Q9WYP4	0.141618	RXN-11099	RXN-14359	0.181914
UNIPROT:P08078	UNIPROT:Q44250	0.200581	RXN-11099	RXN-15251	0.240788
UNIPROT:P08078	UNIPROT:Q607G3	0.19186	RXN-11099	RXN-17664	0.930925
UNIPROT:P08078	UNIPROT:D4GYH3	0.158046	RXN-11099	RXN-16599	0.362916
UNIPROT:P08078	UNIPROT:Q7WYU8	0.140805	RXN-11099	RXN-10889	0.176177
UNIPROT:P08078	UNIPROT:P22636	0.178161	RXN-11099	RXN-10889	0.176177
UNIPROT:P08078	UNIPROT:Q56166	0.190202	RXN-11099	RXN-11977	0.460957
UNIPROT:P08078	UNIPROT:Q56167	0.189655	RXN-11099	RXN-11977	0.460957
UNIPROT:P08078	UNIPROT:P9WIM5	0.221239	RXN-11099	RXN-17288	0.268794
UNIPROT:P08078	UNIPROT:Q8KQE6	0.158904	RXN-11099	RXN-17639	0.930925
UNIPROT:P08078	UNIPROT:Q8KQE9	0.158568	RXN-11099	RXN-17639	0.930925
UNIPROT:P08078	UNIPROT:Q9AJE3	0.189655	RXN-11099	RXN-9455	0.277122
UNIPROT:P08078	UNIPROT:A0A096ZED0	0.177143	RXN-11099	RXN-16303	0.106802
UNIPROT:P08078	UNIPROT:A0A096ZEC9	0.164306	RXN-11099	RXN-16303	0.106802
UNIPROT:P08078	UNIPROT:Q8TUC0	0.165761	RXN-11099	RXN-13080	0.332527
UNIPROT:P08078	UNIPROT:A8NU13	0.111429	RXN-11099	RXN-8551	0.394756
UNIPROT:P08078	UNIPROT:P21258	0.149485	RXN-11099	RXN-11459	0.225282
UNIPROT:P08078	UNIPROT:A0A072UVA5	0.196532	RXN-11099	RXN-3585	0.322859
UNIPROT:P08078	UNIPROT:A0A2P6Q9N0	0.190751	RXN-11099	RXN-3585	0.322859
UNIPROT:P08078	UNIPROT:A0A396HBZ7	0.189911	RXN-11099	RXN-3585	0.322859
UNIPROT:P08078	UNIPROT:Q9L4W8	0.171285	RXN-11099	RXN-16252	0.811779
UNIPROT:P08078	UNIPROT:B5GVJ0	0.206897	RXN-11099	RXN-16879	0.3479
UNIPROT:P08078	UNIPROT:Q55217	0.17971	RXN-11099	RXN-14861	0.152378
UNIPROT:P08078	UNIPROT:Q841L0	0.202857	RXN-11099	RXN-15927	0.353835
UNIPROT:P08078	UNIPROT:P07383	0.173913	RXN-11099	TROPINESTERASE-RXN	0.157618
UNIPROT:P08078	UNIPROT:Q9ALM9	0.22029	RXN-11099	RXN-13633	0.228524
UNIPROT:P08078	UNIPROT:Q57900	0.193084	RXN-11099	RXN-15944	0.35347
UNIPROT:P08078	UNIPROT:R9TPE4	0.226744	RXN-11099	RXN-11518	0.912967
UNIPROT:P08078	UNIPROT:M1EY73	0.178161	RXN-11099	RXN-11518	0.912967
UNIPROT:P08078	UNIPROT:E5AX04	0.355978	RXN-11099	RXN-13073	0.141412
UNIPROT:P08078	UNIPROT:E8W6C7	0.14876	RXN-11099	RXN-18793	0.416694
UNIPROT:P08078	UNIPROT:Q643C8	0.166667	RXN-11099	RXN-14468	0.31183
UNIPROT:P08078	UNIPROT:Q54375	0.236994	RXN-11099	RXN-21213	0.196197
UNIPROT:P08078	UNIPROT:P0ABK5	0.140805	RXN-11099	S-CARBOXYMETHYLCYSTEINE-SYNTHASE-RXN	0.153098
UNIPROT:P08078	UNIPROT:C6WFL3	0.181102	RXN-11099	RXN-17373	0.248789
UNIPROT:P08078	UNIPROT:E2PZ87	0.144847	RXN-11099	RXN-16869	0.0919548
UNIPROT:P08078	UNIPROT:Q05590	0.210375	RXN-11099	RXN-8761	0.245545
UNIPROT:P08078	UNIPROT:Q9ZHQ4	0.194444	RXN-11099	DEMETHYLMACROCIN-O-METHYLTRANSFERASE-RXN	0.225701
UNIPROT:P08078	UNIPROT:W0LV34	0.190202	RXN-11099	RXN-15400	0.228798
UNIPROT:P08078	UNIPROT:Q841K5	0.170426	RXN-11099	RXN-15938	0.307138
UNIPROT:P08078	UNIPROT:Q8TKU6	0.149871	RXN-11099	R231-RXN	0.186488
UNIPROT:P08078	UNIPROT:A2AXG5	0.18314	RXN-11099	RXN-15421	0.239989
UNIPROT:P08078	UNIPROT:Q54355	0.178161	RXN-11099	RXN-21208	0.217599
UNIPROT:P08078	UNIPROT:P77503	0.168975	RXN-11099	RXN-20682	0.915099
UNIPROT:P08078	UNIPROT:Q56772	0.149051	RXN-11099	RXN-11800	0.286174
UNIPROT:P08078	UNIPROT:D3WZ86	0.201166	RXN-11099	RXN-14253	0.175158
UNIPROT:P08078	UNIPROT:Q5V8A6	0.181122	RXN-11099	RXN-17002	0.25084
UNIPROT:P08078	UNIPROT:Q84IP8	0.152778	RXN-11099	RXN-10897	0.174388
UNIPROT:P08078	UNIPROT:Q8RJ47	0.152299	RXN-11099	RXN-10897	0.174388
UNIPROT:P08078	UNIPROT:B7X4E0	0.172911	RXN-11099	RXN-15638	0.110921
UNIPROT:P08078	UNIPROT:A9AWD6	0.198276	RXN-11099	RXN-18973	0.292822
UNIPROT:P08078	UNIPROT:Q9AJC6	0.165803	RXN-11099	RXN-8808	0.917133
UNIPROT:P08078	UNIPROT:O33708	0.186782	RXN-11099	RXN-18003	0.869843
UNIPROT:P08078	UNIPROT:Q8X5N4	0.217009	RXN-11099	RXN-18463	0.795801
UNIPROT:P08078	UNIPROT:S4W780	0.140884	RXN-11099	RXN-16694	0.236612
UNIPROT:P08078	UNIPROT:P35270	0.210375	RXN-11099	1.1.1.220-RXN	0.93177
UNIPROT:P08078	UNIPROT:A0A1X9QHJ0	0.163793	RXN-11099	1.1.1.285-RXN	0.898784
UNIPROT:P08078	UNIPROT:Q0PCF5	0.17192	RXN-11099	1.1.1.285-RXN	0.898784
UNIPROT:P08078	UNIPROT:P54997	0.183288	RXN-11099	RXN-624	0.166063
UNIPROT:P08078	UNIPROT:P43623	0.119658	RXN-11099	RXN-19561	0.152102
UNIPROT:P08078	UNIPROT:Q8L347	0.161383	RXN-11099	RXN-14763	0.92955
UNIPROT:P08078	UNIPROT:Q83WG6	0.170051	RXN-11099	RXN-10930	0.15088
UNIPROT:P08078	UNIPROT:Q5W242	0.117318	RXN-11099	RXN-15785	0.910922
UNIPROT:P08078	UNIPROT:Q8RMD4	0.178674	RXN-11099	RXN-16280	0.285029
UNIPROT:P08078	UNIPROT:Q8RMD1	0.209302	RXN-11099	RXN-16712	0.110232
UNIPROT:P08078	UNIPROT:Q75VW6	0.121813	RXN-11099	CITRATE--COA-LIGASE-RXN	0.318709
UNIPROT:P08078	UNIPROT:D2Z030	0.198276	RXN-11099	RXN-14460	0.404677
UNIPROT:P08078	UNIPROT:O86043	0.214076	RXN-11099	MALEYLPYRUVATE-ISOMERASE-RXN	0.110232
UNIPROT:P08078	UNIPROT:Q8NLC1	0.233429	RXN-11099	MALEYLPYRUVATE-ISOMERASE-RXN	0.110232
UNIPROT:P08078	UNIPROT:Q9WXT2	0.17765	RXN-11099	CEPHALOSPORIN-C-DEACETYLASE-RXN	0.148126
UNIPROT:P08078	UNIPROT:P94388	0.137931	RXN-11099	CEPHALOSPORIN-C-DEACETYLASE-RXN	0.148126
UNIPROT:P08078	UNIPROT:P11444	0.163435	RXN-11099	MANDELATE-RACEMASE-RXN	0.110232
UNIPROT:P08078	UNIPROT:A9CPS8	0.190883	RXN-11099	RXN-11152	0.240035
UNIPROT:P08078	UNIPROT:P0A955	0.221902	RXN-11099	RXN-13990	0.17667
UNIPROT:P08078	UNIPROT:B6CWJ2	0.196532	RXN-11099	RXN-12154	0.184939
UNIPROT:P08078	UNIPROT:Q2YIQ3	0.157593	RXN-11099	RXN-17771	0.110232
UNIPROT:P08078	UNIPROT:Q53U10	0.208092	RXN-11099	RXN-13177	0.19885
UNIPROT:P08078	UNIPROT:Q54360	0.196532	RXN-11099	RXN-21216	0.219011
UNIPROT:P08078	UNIPROT:Q8KDS7	0.187861	RXN-11099	RXN-19140	0.297771
UNIPROT:P08078	UNIPROT:P0A9S5	0.157182	RXN-11099	RXN-8632	0.929228
UNIPROT:P08078	UNIPROT:P15121	0.152738	RXN-11099	RXN-8632	0.929228
UNIPROT:P08078	UNIPROT:A1K6X2	0.161017	RXN-11099	1.14.13.61-RXN	0.920086
UNIPROT:P08078	UNIPROT:W8X526	0.210375	RXN-11099	RXN-20144	0.818047
UNIPROT:P08078	UNIPROT:A6KWY2	0.162393	RXN-11099	RXN-15924	0.918558
UNIPROT:P08078	UNIPROT:Q9AJU1	0.166667	RXN-11099	RXN-15404	0.215669
UNIPROT:P08078	UNIPROT:A0A0H3L1B8	0.164265	RXN-11099	RXN-21280	0.229613
UNIPROT:P08078	UNIPROT:Q0P8V9	0.164265	RXN-11099	RXN-12235	0.281342
UNIPROT:P08078	UNIPROT:Q9ALN0	0.214106	RXN-11099	RXN-13631	0.235935
UNIPROT:P08078	UNIPROT:Q2L6E3	0.172414	RXN-11099	RXN-15425	0.220218
UNIPROT:P08078	UNIPROT:Q5KSN4	0.18732	RXN-11099	RXN-9299	0.291819
UNIPROT:P08078	UNIPROT:P13082	0.207493	RXN-11099	STREPTOMYCIN-3-KINASE-RXN	0.312959
UNIPROT:P08078	UNIPROT:P18150	0.225434	RXN-11099	STREPTOMYCIN-3-KINASE-RXN	0.312959
UNIPROT:P08078	UNIPROT:P0DL13	0.110482	RXN-11099	RXN-13761	0.390831
UNIPROT:P08078	UNIPROT:Q9HZV7	0.208092	RXN-11099	ISOHEXENYLGLUTACONYL-COA-HYDRATASE-RXN	0.231732
UNIPROT:P08078	UNIPROT:P21133	0.13649	RXN-11099	RXN-17061	0.140583
UNIPROT:P08078	UNIPROT:P0ACA7	0.210983	RXN-11099	RXN0-6549	0.146861
UNIPROT:P08078	UNIPROT:Q01109	0.179191	RXN-11099	RXN-10840	0.09613
UNIPROT:P08078	UNIPROT:B5GS26	0.172414	RXN-11099	RXN-12832	0.407487
UNIPROT:P08078	UNIPROT:A0A0A8J6B3	0.155556	RXN-11099	RXN-17078	0.181302
UNIPROT:P08078	UNIPROT:Q2MF64	0.225806	RXN-11099	RXN-13208	0.199086
UNIPROT:P08078	UNIPROT:A0A318P116	0.15625	RXN-11099	RXN-20719	0.258441
UNIPROT:P08078	PID:QDE10275.1	0.149425	RXN-11099	RXN-12208	0.93177
UNIPROT:P08078	UNIPROT:Q00460	0.174785	RXN-11099	RXN-18391	0.926336
UNIPROT:P08078	UNIPROT:P32352	0.184438	RXN-11099	RXN3O-203	0.171169
UNIPROT:P08078	UNIPROT:E5KJ99	0.144092	RXN-11099	RXN-18069	0.282099
UNIPROT:P08078	UNIPROT:D4GP31	0.184971	RXN-11099	RXN-12246	0.216303
UNIPROT:P08078	UNIPROT:A0A0H3C6P8	0.181034	RXN-11099	RXN-12246	0.216303
UNIPROT:P08078	UNIPROT:K4REZ6	0.201729	RXN-11099	RXN-18509	0.125447
UNIPROT:P08078	UNIPROT:G9EZR6	0.131429	RXN-11099	INDOLELACTATE-DEHYDROGENASE-RXN	0.886363
UNIPROT:P08078	UNIPROT:A0A1B4XTS0	0.151099	RXN-11099	L-XYLOSE-1-DEHYDROGENASE-RXN	0.917056
UNIPROT:P08078	UNIPROT:Q58247	0.184438	RXN-11099	RXN-12356	0.138737
UNIPROT:P08078	UNIPROT:P52984	0.184438	RXN-11099	GALACTOACETYLTRAN-RXN	0.342978
UNIPROT:P08078	UNIPROT:B5HDJ6	0.15847	RXN-11099	RXN-18886	0.399435
UNIPROT:P08078	UNIPROT:O87833	0.178295	RXN-11099	RXN-12802	0.230709
UNIPROT:P08078	UNIPROT:Q6N8W7	0.170029	RXN-11099	RXN-13392	0.233559
UNIPROT:P08078	UNIPROT:P84888	0.188776	RXN-11099	ARALKYLAMINE-DEHYDROGENASE-RXN	0.115544
UNIPROT:P08078	UNIPROT:Q0X0A8	0.168571	RXN-11099	RXN-17156	0.117298
UNIPROT:P08078	UNIPROT:Q97K92	0.173469	RXN-11099	RXN-14692	0.931841
UNIPROT:P08078	UNIPROT:E3SET7	0.204611	RXN-11099	RXN-19528	0.145474
UNIPROT:P08078	UNIPROT:Q93TU6	0.210983	RXN-11099	RXN-13332	0.146432
UNIPROT:P08078	UNIPROT:A0A482UYG1	0.172324	RXN-11099	RXN-15617	0.303162
UNIPROT:P08078	UNIPROT:Q988D0	0.204611	RXN-11099	4.1.1.51-RXN	0.177949
UNIPROT:P08078	UNIPROT:O82834	0.140401	RXN-11099	RXN-10895	0.17167
UNIPROT:P08078	PID:AAH25724	0.146974	RXN-11099	RXN-13363	0.899635
UNIPROT:P08078	UNIPROT:Q0QLF5	0.176301	RXN-11099	1.1.1.291-RXN	0.919087
UNIPROT:P08078	UNIPROT:P83772	0.215116	RXN-11099	CREATININASE-RXN	0.10864
UNIPROT:P08078	UNIPROT:O66183	0.206997	RXN-11099	CREATININASE-RXN	0.10864
UNIPROT:P08078	UNIPROT:B0R5X4	0.213256	RXN-11099	RXN-6261	0.243865
UNIPROT:P08078	UNIPROT:Q05600	0.150289	RXN-11099	RXN-6261	0.243865
UNIPROT:P08078	UNIPROT:P21634	0.160458	RXN-11099	RXN-6261	0.243865
UNIPROT:P08078	UNIPROT:Q194Q1	0.157593	RXN-11099	RXN-13385	0.769429
UNIPROT:P08078	UNIPROT:O66188	0.202899	RXN-11099	RXN-1761	0.115993
UNIPROT:P08078	UNIPROT:B0CN28	0.163043	RXN-11099	RXN-15302	0.151944
UNIPROT:P08078	UNIPROT:P29082	0.183908	RXN-11099	1.13.11.55-RXN	0.124438
UNIPROT:P08078	UNIPROT:A0A1V0ELS9	0.157754	RXN-11099	RXN-19523	0.173214
UNIPROT:P08078	UNIPROT:P76423	0.170029	RXN-11099	RXN0-7298	0.409771
UNIPROT:P08078	UNIPROT:Q8ZL58	0.174684	RXN-11099	RXN-16224	0.276841
UNIPROT:P08078	UNIPROT:P00733	0.227666	RXN-11099	RXN-15275	0.165096
UNIPROT:P08078	UNIPROT:Q4K1B3	0.193084	RXN-11099	RXN-13104	0.278603
UNIPROT:P08078	UNIPROT:P25741	0.195965	RXN-11099	RXN0-5121	0.122663
UNIPROT:P08078	UNIPROT:M1RY63	0.211594	RXN-11099	RXN-15933	0.193478
UNIPROT:P08078	UNIPROT:C4WIL4	0.175793	RXN-11099	1.13.11.28-RXN	0.181266
UNIPROT:P08078	UNIPROT:Q9L9F2	0.195906	RXN-11099	RXN-14545	0.217477
UNIPROT:P08078	UNIPROT:C0JRF9	0.175793	RXN-11099	RXN-16917	0.209168
UNIPROT:P08078	UNIPROT:Q988C8	0.181556	RXN-11099	RXN-19622	0.914907
UNIPROT:P08078	UNIPROT:Q42605	0.13649	RXN-11099	UDP-ARABINOSE-4-EPIMERASE-RXN	0.110232
UNIPROT:P08078	UNIPROT:Q92WA3	0.144092	RXN-11099	UDP-ARABINOSE-4-EPIMERASE-RXN	0.110232
UNIPROT:P08078	UNIPROT:P77256	0.180791	RXN-11099	RXN0-5213	0.926825
UNIPROT:P08078	UNIPROT:D1H0I0	0.201729	RXN-11099	RXN-16841	0.316636
UNIPROT:P08078	UNIPROT:S6AU36	0.12605	RXN-11099	RXN-15022	0.28182
UNIPROT:P08078	UNIPROT:A4F5C0	0.137143	RXN-11099	RXN-15022	0.28182
UNIPROT:P08078	UNIPROT:C5CBV8	0.210375	RXN-11099	2.4.1.54-RXN	0.285602
UNIPROT:P08078	UNIPROT:O86507	0.225434	RXN-11099	UREASE-RXN	0.129024
UNIPROT:P08078	UNIPROT:Q4ZUD1	0.219941	RXN-11099	UREASE-RXN	0.129024
UNIPROT:P08078	UNIPROT:Q5J1R4	0.197995	RXN-11099	RXN-17842	0.151908
UNIPROT:P08078	UNIPROT:Q0P8T1	0.144068	RXN-11099	RXN-12238	0.181302
UNIPROT:P08078	UNIPROT:Q5ZXH9	0.155738	RXN-11099	RXN-12238	0.181302
UNIPROT:P08078	UNIPROT:O31201	0.212644	RXN-11099	N-FORMYLGLUTAMATE-DEFORMYLASE-RXN	0.237179
UNIPROT:P08078	UNIPROT:D4HRI4	0.151685	RXN-11099	RXN-15545	0.200213
UNIPROT:P08078	UNIPROT:M1WXK8	0.190751	RXN-11099	RXN-15017	0.92209
UNIPROT:P08078	UNIPROT:A0A0D4BS77	0.150997	RXN-11099	RXN-17530	0.282832
UNIPROT:P08078	UNIPROT:P39400	0.120344	RXN-11099	RXN0-5229	0.932107
UNIPROT:P08078	UNIPROT:A6KWY5	0.159091	RXN-11099	RXN0-5229	0.932107
UNIPROT:P08078	UNIPROT:A0A2R4BIG1	0.225434	RXN-11099	KDUD-RXN	0.922541
UNIPROT:P08078	UNIPROT:Q5WJ78	0.184211	RXN-11099	KDUD-RXN	0.922541
UNIPROT:P08078	UNIPROT:M7N957	0.202941	RXN-11099	KDUD-RXN	0.922541
UNIPROT:P08078	UNIPROT:E0Q537	0.175793	RXN-11099	KDUD-RXN	0.922541
UNIPROT:P08078	UNIPROT:C5PAN9	0.192982	RXN-11099	KDUD-RXN	0.922541
UNIPROT:P08078	UNIPROT:Q6W2B4	0.201754	RXN-11099	KDUD-RXN	0.922541
UNIPROT:P08078	UNIPROT:S9S342	0.227666	RXN-11099	KDUD-RXN	0.922541
UNIPROT:P08078	UNIPROT:G8NZC2	0.190751	RXN-11099	KDUD-RXN	0.922541
UNIPROT:P08078	UNIPROT:Q746L6	0.217391	RXN-11099	KDUD-RXN	0.922541
UNIPROT:P08078	UNIPROT:M5F6Z0	0.205797	RXN-11099	KDUD-RXN	0.922541
UNIPROT:P08078	UNIPROT:A0A0T6AGT4	0.195965	RXN-11099	KDUD-RXN	0.922541
UNIPROT:P08078	UNIPROT:A0A2H1JQ65	0.190202	RXN-11099	KDUD-RXN	0.922541
UNIPROT:P08078	UNIPROT:C2F9B1	0.16763	RXN-11099	KDUD-RXN	0.922541
UNIPROT:P08078	UNIPROT:K0Q3C3	0.182081	RXN-11099	KDUD-RXN	0.922541
UNIPROT:P08078	UNIPROT:A0A0B8N4L7	0.207493	RXN-11099	KDUD-RXN	0.922541
UNIPROT:P08078	UNIPROT:A0A330FMH7	0.218935	RXN-11099	KDUD-RXN	0.922541
UNIPROT:P08078	UNIPROT:A0QXP6	0.224784	RXN-11099	KDUD-RXN	0.922541
UNIPROT:P08078	UNIPROT:A0A1J1LR59	0.179191	RXN-11099	KDUD-RXN	0.922541
UNIPROT:P08078	UNIPROT:A0A0M2NGY6	0.190202	RXN-11099	KDUD-RXN	0.922541
UNIPROT:P08078	UNIPROT:A9CXT7	0.204678	RXN-11099	KDUD-RXN	0.922541
UNIPROT:P08078	UNIPROT:A0A157SQI4	0.242075	RXN-11099	KDUD-RXN	0.922541
UNIPROT:P08078	UNIPROT:Q2YIZ9	0.204611	RXN-11099	KDUD-RXN	0.922541
UNIPROT:P08078	UNIPROT:E6PWU6	0.196532	RXN-11099	KDUD-RXN	0.922541
UNIPROT:P08078	UNIPROT:A0RX79	0.209302	RXN-11099	KDUD-RXN	0.922541
UNIPROT:P08078	UNIPROT:A0A090S106	0.197674	RXN-11099	KDUD-RXN	0.922541
UNIPROT:P08078	UNIPROT:D4M306	0.19883	RXN-11099	KDUD-RXN	0.922541
UNIPROT:P08078	UNIPROT:W1QHB1	0.18732	RXN-11099	KDUD-RXN	0.922541
UNIPROT:P08078	UNIPROT:C1F1F8	0.192982	RXN-11099	KDUD-RXN	0.922541
UNIPROT:P08078	UNIPROT:A4AEN1	0.199422	RXN-11099	KDUD-RXN	0.922541
UNIPROT:P08078	UNIPROT:A0A291T4T6	0.195906	RXN-11099	KDUD-RXN	0.922541
UNIPROT:P08078	UNIPROT:A0A2N9M5P1	0.210059	RXN-11099	KDUD-RXN	0.922541
UNIPROT:P08078	UNIPROT:D4VL62	0.167147	RXN-11099	KDUD-RXN	0.922541
UNIPROT:P08078	UNIPROT:G2LJV0	0.204678	RXN-11099	KDUD-RXN	0.922541
UNIPROT:P08078	UNIPROT:A0A412G163	0.216374	RXN-11099	KDUD-RXN	0.922541
UNIPROT:P08078	UNIPROT:Q92MQ0	0.198847	RXN-11099	KDUD-RXN	0.922541
UNIPROT:P08078	UNIPROT:A0A121AFB3	0.184971	RXN-11099	KDUD-RXN	0.922541
UNIPROT:P08078	UNIPROT:F5Y738	0.190202	RXN-11099	KDUD-RXN	0.922541
UNIPROT:P08078	UNIPROT:Q82UC5	0.204611	RXN-11099	KDUD-RXN	0.922541
UNIPROT:P08078	UNIPROT:A0A1D7QS52	0.196481	RXN-11099	KDUD-RXN	0.922541
UNIPROT:P08078	UNIPROT:A4F6Q4	0.222222	RXN-11099	KDUD-RXN	0.922541
UNIPROT:P08078	UNIPROT:C0MA34	0.193084	RXN-11099	KDUD-RXN	0.922541
UNIPROT:P08078	UNIPROT:A0A2E8X480	0.201729	RXN-11099	KDUD-RXN	0.922541
UNIPROT:P08078	UNIPROT:A0A0N9ZQJ6	0.21345	RXN-11099	KDUD-RXN	0.922541
UNIPROT:P08078	UNIPROT:F7RTQ9	0.195965	RXN-11099	KDUD-RXN	0.922541
UNIPROT:P08078	UNIPROT:Q0RGH3	0.190751	RXN-11099	KDUD-RXN	0.922541
UNIPROT:P08078	UNIPROT:A0A2P9HCQ4	0.185507	RXN-11099	KDUD-RXN	0.922541
UNIPROT:P08078	UNIPROT:A0A1C7FCM2	0.195965	RXN-11099	KDUD-RXN	0.922541
UNIPROT:P08078	UNIPROT:A0A0B8NKQ4	0.221264	RXN-11099	KDUD-RXN	0.922541
UNIPROT:P08078	UNIPROT:E3PU64	0.19883	RXN-11099	KDUD-RXN	0.922541
UNIPROT:P08078	UNIPROT:A0A0D0NNH8	0.226087	RXN-11099	KDUD-RXN	0.922541
UNIPROT:P08078	UNIPROT:A1ZR47	0.184971	RXN-11099	KDUD-RXN	0.922541
UNIPROT:P08078	UNIPROT:A0A212JFN8	0.2	RXN-11099	KDUD-RXN	0.922541
UNIPROT:P08078	UNIPROT:B7RQK7	0.190058	RXN-11099	KDUD-RXN	0.922541
UNIPROT:P08078	UNIPROT:A0A411ZDC6	0.214493	RXN-11099	KDUD-RXN	0.922541
UNIPROT:P08078	UNIPROT:M7NEJ9	0.16474	RXN-11099	KDUD-RXN	0.922541
UNIPROT:P08078	UNIPROT:A0A2N9L209	0.207101	RXN-11099	KDUD-RXN	0.922541
UNIPROT:P08078	UNIPROT:A0A0P8A8V8	0.216138	RXN-11099	KDUD-RXN	0.922541
UNIPROT:P08078	UNIPROT:A0A0P7X8S2	0.236311	RXN-11099	KDUD-RXN	0.922541
UNIPROT:P08078	UNIPROT:A0A380Y5N9	0.198847	RXN-11099	KDUD-RXN	0.922541
UNIPROT:P08078	UNIPROT:A0A157P511	0.205202	RXN-11099	KDUD-RXN	0.922541
UNIPROT:P08078	UNIPROT:A0A155F008	0.22093	RXN-11099	KDUD-RXN	0.922541
UNIPROT:P08078	UNIPROT:A0A378HH27	0.207493	RXN-11099	KDUD-RXN	0.922541
UNIPROT:P08078	UNIPROT:A0A109BB78	0.190616	RXN-11099	KDUD-RXN	0.922541
UNIPROT:P08078	UNIPROT:A9IBP7	0.208092	RXN-11099	KDUD-RXN	0.922541
UNIPROT:P08078	UNIPROT:A9D1S0	0.19883	RXN-11099	KDUD-RXN	0.922541
UNIPROT:P08078	UNIPROT:A0A1B3MNZ5	0.17341	RXN-11099	KDUD-RXN	0.922541
UNIPROT:P08078	UNIPROT:Q3JT32	0.205279	RXN-11099	KDUD-RXN	0.922541
UNIPROT:P08078	UNIPROT:A0A2P9ISF8	0.21902	RXN-11099	KDUD-RXN	0.922541
UNIPROT:P08078	UNIPROT:B0PHF0	0.206395	RXN-11099	KDUD-RXN	0.922541
UNIPROT:P08078	UNIPROT:A0A099I690	0.201729	RXN-11099	KDUD-RXN	0.922541
UNIPROT:P08078	UNIPROT:E0S1J7	0.176301	RXN-11099	KDUD-RXN	0.922541
UNIPROT:P08078	UNIPROT:A0A1R4GSD6	0.24058	RXN-11099	KDUD-RXN	0.922541
UNIPROT:P08078	UNIPROT:M5FJA6	0.197059	RXN-11099	KDUD-RXN	0.922541
UNIPROT:P08078	UNIPROT:C2JZR7	0.202312	RXN-11099	KDUD-RXN	0.922541
UNIPROT:P08078	UNIPROT:A0A192CAW4	0.166667	RXN-11099	KDUD-RXN	0.922541
UNIPROT:P08078	UNIPROT:A0A0H5C9E4	0.211594	RXN-11099	KDUD-RXN	0.922541
UNIPROT:P08078	UNIPROT:A0A174D3K1	0.197059	RXN-11099	KDUD-RXN	0.922541
UNIPROT:P08078	UNIPROT:D8J103	0.207493	RXN-11099	KDUD-RXN	0.922541
UNIPROT:P08078	UNIPROT:K8CQ84	0.216138	RXN-11099	KDUD-RXN	0.922541
UNIPROT:P08078	UNIPROT:A0A1R4G105	0.21345	RXN-11099	KDUD-RXN	0.922541
UNIPROT:P08078	UNIPROT:Q0RL41	0.21345	RXN-11099	KDUD-RXN	0.922541
UNIPROT:P08078	UNIPROT:D8DY23	0.181556	RXN-11099	KDUD-RXN	0.922541
UNIPROT:P08078	UNIPROT:A0A2W4GQW4	0.216374	RXN-11099	KDUD-RXN	0.922541
UNIPROT:P08078	UNIPROT:A0A090FD03	0.216138	RXN-11099	KDUD-RXN	0.922541
UNIPROT:P08078	UNIPROT:D8J129	0.197674	RXN-11099	KDUD-RXN	0.922541
UNIPROT:P08078	UNIPROT:F0RUI9	0.202312	RXN-11099	KDUD-RXN	0.922541
UNIPROT:P08078	UNIPROT:A0A369QAV2	0.205202	RXN-11099	KDUD-RXN	0.922541
UNIPROT:P08078	UNIPROT:A0A2X2V9W4	0.195965	RXN-11099	KDUD-RXN	0.922541
UNIPROT:P08078	UNIPROT:M5BSF9	0.17052	RXN-11099	KDUD-RXN	0.922541
UNIPROT:P08078	UNIPROT:A0A212LVE9	0.216374	RXN-11099	KDUD-RXN	0.922541
UNIPROT:P08078	UNIPROT:S0G552	0.208092	RXN-11099	KDUD-RXN	0.922541
UNIPROT:P08078	UNIPROT:A0A060QGT5	0.190202	RXN-11099	KDUD-RXN	0.922541
UNIPROT:P08078	UNIPROT:A0A0T6ARJ6	0.201729	RXN-11099	KDUD-RXN	0.922541
UNIPROT:P08078	UNIPROT:A0A3B0T819	0.184211	RXN-11099	KDUD-RXN	0.922541
UNIPROT:P08078	UNIPROT:F7Q8X2	0.190202	RXN-11099	KDUD-RXN	0.922541
UNIPROT:P08078	UNIPROT:A0A0F4FJJ9	0.21345	RXN-11099	KDUD-RXN	0.922541
UNIPROT:P08078	UNIPROT:A0A0B0IJW3	0.207493	RXN-11099	KDUD-RXN	0.922541
UNIPROT:P08078	UNIPROT:A0A1Y0UZN7	0.193084	RXN-11099	KDUD-RXN	0.922541
UNIPROT:P08078	UNIPROT:F4KQU0	0.190058	RXN-11099	KDUD-RXN	0.922541
UNIPROT:P08078	UNIPROT:A0A0W0GJY4	0.181818	RXN-11099	KDUD-RXN	0.922541
UNIPROT:P08078	UNIPROT:A0A369QPQ7	0.196532	RXN-11099	KDUD-RXN	0.922541
UNIPROT:P08078	UNIPROT:A0A2X4VSG6	0.195965	RXN-11099	KDUD-RXN	0.922541
UNIPROT:P08078	UNIPROT:D8IP07	0.222543	RXN-11099	KDUD-RXN	0.922541
UNIPROT:P08078	UNIPROT:A0A0H3KSJ9	0.216617	RXN-11099	KDUD-RXN	0.922541
UNIPROT:P08078	UNIPROT:A9D9F2	0.207493	RXN-11099	KDUD-RXN	0.922541
UNIPROT:P08078	UNIPROT:A9D7C2	0.216138	RXN-11099	KDUD-RXN	0.922541
UNIPROT:P08078	UNIPROT:U4E1R1	0.204678	RXN-11099	KDUD-RXN	0.922541
UNIPROT:P08078	UNIPROT:A0A3B1D5G7	0.21345	RXN-11099	KDUD-RXN	0.922541
UNIPROT:P08078	UNIPROT:C5BY10	0.197674	RXN-11099	KDUD-RXN	0.922541
UNIPROT:P08078	UNIPROT:A0A0E2U9Z4	0.189504	RXN-11099	KDUD-RXN	0.922541
UNIPROT:P08078	UNIPROT:A0A087S302	0.186047	RXN-11099	KDUD-RXN	0.922541
UNIPROT:P08078	UNIPROT:M7MRV6	0.212209	RXN-11099	KDUD-RXN	0.922541
UNIPROT:P08078	UNIPROT:A0A2K8W1I6	0.190202	RXN-11099	KDUD-RXN	0.922541
UNIPROT:P08078	UNIPROT:A0A0P7ZXJ4	0.207602	RXN-11099	KDUD-RXN	0.922541
UNIPROT:P08078	UNIPROT:F7QNJ9	0.182081	RXN-11099	KDUD-RXN	0.922541
UNIPROT:P08078	UNIPROT:A0A170Q9R0	0.202346	RXN-11099	KDUD-RXN	0.922541
UNIPROT:P08078	UNIPROT:A0A1Y5P4M7	0.219653	RXN-11099	KDUD-RXN	0.922541
UNIPROT:P08078	UNIPROT:A0A175BZS8	0.176301	RXN-11099	KDUD-RXN	0.922541
UNIPROT:P08078	UNIPROT:A0A1D7W0Q2	0.227666	RXN-11099	KDUD-RXN	0.922541
UNIPROT:P08078	UNIPROT:A0A241QHL1	0.203488	RXN-11099	KDUD-RXN	0.922541
UNIPROT:P08078	UNIPROT:A0QZR1	0.225146	RXN-11099	KDUD-RXN	0.922541
UNIPROT:P08078	UNIPROT:D4Z0V3	0.21902	RXN-11099	KDUD-RXN	0.922541
UNIPROT:P08078	UNIPROT:A0A0P7YFR1	0.184438	RXN-11099	KDUD-RXN	0.922541
UNIPROT:P08078	UNIPROT:Q5DB51	0.182081	RXN-11099	KDUD-RXN	0.922541
UNIPROT:P08078	UNIPROT:A0A0D6ICU0	0.213873	RXN-11099	KDUD-RXN	0.922541
UNIPROT:P08078	UNIPROT:A0A448I9Z1	0.198847	RXN-11099	KDUD-RXN	0.922541
UNIPROT:P08078	UNIPROT:E9RFT0	0.156425	RXN-11099	RXN-17568	0.929402
UNIPROT:P08078	UNIPROT:E9RFT1	0.160326	RXN-11099	RXN-17568	0.929402
UNIPROT:P08078	UNIPROT:K0E689	0.157609	RXN-11099	RXN-16495	0.870735
UNIPROT:P08078	UNIPROT:P39315	0.175793	RXN-11099	RXN0-5387	0.917009
UNIPROT:P08078	UNIPROT:P40952	0.187032	RXN-11099	2-ENOATE-REDUCTASE-RXN	0.926487
UNIPROT:P08078	UNIPROT:D4GYG7	0.184971	RXN-11099	RXN-16597	0.362916
UNIPROT:P08078	UNIPROT:Q9S4D5	0.210375	RXN-11099	RXN-15071	0.220965
UNIPROT:P08078	UNIPROT:P27457	0.208092	RXN-11099	RXN-10903	0.23341
UNIPROT:P08078	UNIPROT:Q6KZB1	0.12069	RXN-11099	RXN-15647	0.378999
UNIPROT:P08078	UNIPROT:Q9HIN1	0.153179	RXN-11099	RXN-15647	0.378999
UNIPROT:P08078	UNIPROT:Q9VSL3	0.211144	RXN-11099	1.5.4.1-RXN	0.206463
UNIPROT:P08078	UNIPROT:Q67FT0	0.147453	RXN-11099	RXN-11748	0.194825
UNIPROT:P08078	UNIPROT:A0A023J9D7	0.161383	RXN-11099	RXN-20424	0.287146
UNIPROT:P08078	UNIPROT:V5V0R8	0.213873	RXN-11099	RXN-16658	0.262486
UNIPROT:P08078	UNIPROT:B2DFG5	0.160526	RXN-11099	RXN-11767	0.230915
UNIPROT:P08078	UNIPROT:Q2SYH7	0.169863	RXN-11099	RXN-13776	0.110232
UNIPROT:P08078	UNIPROT:Q8RNX9	0.193642	RXN-11099	GALLATE-DIOXYGENASE-RXN	0.17673
UNIPROT:P08078	UNIPROT:A9WRZ1	0.18732	RXN-11099	12-ALPHA-L-FUCOSIDASE-RXN	0.205802
UNIPROT:P08078	UNIPROT:A9WRZ2	0.178674	RXN-11099	12-ALPHA-L-FUCOSIDASE-RXN	0.205802
UNIPROT:P08078	UNIPROT:A9CES3	0.143266	RXN-11099	RXN-18474	0.908188
UNIPROT:P08078	UNIPROT:Q56773	0.148148	RXN-11099	RXN-11801	0.181929
UNIPROT:P08078	UNIPROT:Q56840	0.213256	RXN-11099	1.1.1.268-RXN	0.918577
UNIPROT:P08078	UNIPROT:Q4X158	0.193084	RXN-11099	RXN-16211	0.233555
UNIPROT:P08078	UNIPROT:C0SUJ9	0.178161	RXN-11099	RXN-10898	0.904541
UNIPROT:P08078	UNIPROT:C0SUK1	0.183908	RXN-11099	RXN-10898	0.904541
UNIPROT:P08078	UNIPROT:B0CN31	0.152589	RXN-11099	RXN-15305	0.273393
UNIPROT:P08078	UNIPROT:Q8A710	0.176301	RXN-11099	RXN-9993	0.309216
UNIPROT:P08078	UNIPROT:O50440	0.135359	RXN-11099	RXN-17178	0.204369
UNIPROT:P08078	UNIPROT:B0B7P4	0.193084	RXN-11099	RXN-15730	0.154123
UNIPROT:P08078	PID:ALG05117	0.173184	RXN-11099	RXN-17348	0.266943
UNIPROT:P08078	PID:ALG05119	0.142857	RXN-11099	RXN-16361	0.261531
UNIPROT:P08078	UNIPROT:Q9F7E0	0.210983	RXN-11099	CYCLOHEXANOL-DEHYDROGENASE-RXN	0.924547
UNIPROT:P08078	PID:BAD80839	0.143678	RXN-11099	RXN-3625	0.16076
UNIPROT:P08078	UNIPROT:K5B7F3	0.21902	RXN-11099	RXN-21046	0.335086
UNIPROT:P08078	UNIPROT:Q841K2	0.213256	RXN-11099	RXN-15936	0.194543
UNIPROT:P08078	UNIPROT:C4PWA1	0.186782	RXN-11099	RXN-15417	0.211085
UNIPROT:P08078	UNIPROT:D4GYG6	0.158177	RXN-11099	RXN-19208	0.110232
UNIPROT:P08078	UNIPROT:I2N045	0.140401	RXN-11099	RXN-18786	0.353399
UNIPROT:P08078	UNIPROT:O07456	0.204611	RXN-11099	R268-RXN	0.216804
UNIPROT:P08078	UNIPROT:Q46E80	0.18732	RXN-11099	RXN-13084	0.838664
UNIPROT:P08078	UNIPROT:F3Y662	0.148997	RXN-11099	RXN-15026	0.894653
UNIPROT:P08078	UNIPROT:B9U6P4	0.178392	RXN-11099	RXN-15375	0.193124
UNIPROT:P08078	UNIPROT:A0A0H3CYV1	0.210375	RXN-11099	RXN-20244	0.230467
UNIPROT:P08078	UNIPROT:A0A0H3CV00	0.189112	RXN-11099	RXN-20244	0.230467
UNIPROT:P08078	UNIPROT:P09347	0.138122	RXN-11099	R542-RXN	0.915129
UNIPROT:P08078	UNIPROT:Q9I184	0.213256	RXN-11099	RXN-11127	0.170648
UNIPROT:P08078	UNIPROT:D7PC21	0.248538	RXN-11099	RXN-21177	0.269915
UNIPROT:P08078	UNIPROT:D1H0I7	0.216138	RXN-11099	RXN-12773	0.201486
UNIPROT:P08078	UNIPROT:P0CY54	0.163324	RXN-11099	RXN-8787	0.853242
UNIPROT:P08078	UNIPROT:B0K2C3	0.161383	RXN-11099	RXN-17501	0.27028
UNIPROT:P08078	UNIPROT:Q9L9E9	0.177326	RXN-11099	RXN-14668	0.865537
UNIPROT:P08078	UNIPROT:Q7WSJ4	0.128492	RXN-11099	R312-RXN	0.102806
UNIPROT:P08078	UNIPROT:G0Y288	0.176623	RXN-11099	RXN-13291	0.635787
UNIPROT:P08078	PID:BAD80840	0.16092	RXN-11099	RXN-7656	0.157111
UNIPROT:P08078	UNIPROT:O32429	0.145299	RXN-11099	RXN-9767	0.926499
UNIPROT:P08078	UNIPROT:O32433	0.161111	RXN-11099	RXN-9767	0.926499
UNIPROT:P08078	UNIPROT:R1F493	0.148825	RXN-11099	DIMETHYLPROPIOTHETIN-DETHIOMETHYLASE-RXN	0.10638
UNIPROT:P08078	UNIPROT:Q3J6L0	0.204611	RXN-11099	DIMETHYLPROPIOTHETIN-DETHIOMETHYLASE-RXN	0.10638
UNIPROT:P08078	UNIPROT:P0DN22	0.161383	RXN-11099	DIMETHYLPROPIOTHETIN-DETHIOMETHYLASE-RXN	0.10638
UNIPROT:P08078	UNIPROT:P0DN23	0.125348	RXN-11099	DIMETHYLPROPIOTHETIN-DETHIOMETHYLASE-RXN	0.10638
UNIPROT:P08078	UNIPROT:A3SC37	0.241983	RXN-11099	DIMETHYLPROPIOTHETIN-DETHIOMETHYLASE-RXN	0.10638
UNIPROT:P08078	UNIPROT:P04964	0.165217	RXN-11099	RXN-14246	0.899201
UNIPROT:P08078	UNIPROT:Q9KWR0	0.151429	RXN-11099	RXN-14246	0.899201
UNIPROT:P08078	UNIPROT:B0L7F3	0.207602	RXN-11099	RXN-11716	0.188433
UNIPROT:P08078	UNIPROT:A0A0H3L116	0.201729	RXN-11099	RXN-21281	0.212053
UNIPROT:P08078	UNIPROT:E1V7W1	0.1775	RXN-11099	RXN-18397	0.0838653
UNIPROT:P08078	UNIPROT:Q0ZQ46	0.179625	RXN-11099	RXN-15074	0.343746
UNIPROT:P08078	UNIPROT:C1FW05	0.153409	RXN-11099	RXN-18499	0.919715
UNIPROT:P08078	UNIPROT:D7PI17	0.176768	RXN-11099	RXN-16535	0.274559
UNIPROT:P08078	UNIPROT:B5GRC8	0.167131	RXN-11099	RXN-18983	0.299342
UNIPROT:P08078	UNIPROT:B9JK80	0.129577	RXN-11099	RXN-20931	0.919946
UNIPROT:P08078	UNIPROT:Q9K499	0.148352	RXN-11099	RXN-9349	0.392419
UNIPROT:P08078	UNIPROT:A7NH01	0.154728	RXN-11099	RXN-12833	0.401198
UNIPROT:P08078	UNIPROT:A4IP64	0.167089	RXN-11099	LONG-CHAIN-ALCOHOL-DEHYDROGENASE-RXN	0.912287
UNIPROT:P08078	UNIPROT:A4ISB9	0.160207	RXN-11099	LONG-CHAIN-ALCOHOL-DEHYDROGENASE-RXN	0.912287
UNIPROT:P08078	UNIPROT:E5KJ95	0.153409	RXN-11099	RXN-18070	0.190792
UNIPROT:P08078	UNIPROT:E5KJA6	0.205202	RXN-11099	RXN-18070	0.190792
UNIPROT:P08078	UNIPROT:Q05115	0.226744	RXN-11099	4.1.1.76-RXN	0.134337
UNIPROT:P08078	UNIPROT:Q9KHL0	0.187861	RXN-11099	RXN-2002	0.292024
UNIPROT:P08078	UNIPROT:C8WMP0	0.211594	RXN-11099	1.1.1.52-RXN	0.833862
UNIPROT:P08078	UNIPROT:Q9KJF3	0.17268	RXN-11099	RXN-904	0.291316
UNIPROT:P08078	UNIPROT:I6X5U4	0.213256	RXN-11099	RXN-17283	0.212154
UNIPROT:P08078	UNIPROT:Q939Q9	0.142105	RXN-11099	3.1.1.75-RXN	0.192358
UNIPROT:P08078	UNIPROT:O52553	0.219298	RXN-11099	RXN-9580	0.352149
UNIPROT:P08078	UNIPROT:Q93NG3	0.173804	RXN-11099	1.14.13.10-RXN	0.925234
UNIPROT:P08078	UNIPROT:Q52472	0.189655	RXN-11099	D-THREO-ALDOSE-1-DEHYDROGENASE-RXN	0.911498
UNIPROT:P08078	UNIPROT:Q0QLE6	0.15445	RXN-11099	METHYLITACONATE-DELTA-ISOMERASE-RXN	0.122002
UNIPROT:P08078	UNIPROT:G3XD23	0.140805	RXN-11099	RXN-13585	0.867136
UNIPROT:P08078	UNIPROT:C5C797	0.209913	RXN-11099	RXN-19176	0.303579
UNIPROT:P08078	UNIPROT:Q54GH4	0.146974	RXN-11099	MYO-INOSITOL-OXYGENASE-RXN	0.163789
UNIPROT:P08078	UNIPROT:Q8H1S0	0.146974	RXN-11099	MYO-INOSITOL-OXYGENASE-RXN	0.163789
UNIPROT:P08078	UNIPROT:Q9QXN4	0.175793	RXN-11099	MYO-INOSITOL-OXYGENASE-RXN	0.163789
UNIPROT:P08078	UNIPROT:P28306	0.12894	RXN-11099	RXN-17393	0.110232
UNIPROT:P08078	UNIPROT:Q9F7D7	0.166667	RXN-11099	6-HEXANOLIDE-HYDROLYSIS-RXN	0.138801
UNIPROT:P08078	PID:ALG05135	0.166667	RXN-11099	RXN-16344	0.187943
UNIPROT:P08078	UNIPROT:O30478	0.173669	RXN-11099	RXN-14940	0.174578
UNIPROT:P08078	UNIPROT:A0A076N4W8	0.213256	RXN-11099	RXN-19273	0.200708
UNIPROT:P08078	UNIPROT:Q2MJC4	0.160112	RXN-11099	RXN-11130	0.339724
UNIPROT:P08078	UNIPROT:A0A1N7TX40	0.204023	RXN-11099	RXN-20662	0.189588
UNIPROT:P08078	UNIPROT:Q5LS57	0.176152	RXN-11099	RXN-9736	0.113129
UNIPROT:P08078	UNIPROT:Q4FP21	0.161725	RXN-11099	RXN-9736	0.113129
UNIPROT:P08078	UNIPROT:Q49492	0.214076	RXN-11099	RXN-12800	0.219761
UNIPROT:P08078	UNIPROT:Q9RC92	0.161376	RXN-11099	RXN-12178	0.223662
UNIPROT:P08078	UNIPROT:Q8E372	0.175879	RXN-11099	RXN-12178	0.223662
UNIPROT:P08078	UNIPROT:D9XD61	0.170868	RXN-11099	RXN-18823	0.397947
UNIPROT:P08078	UNIPROT:P00557	0.141243	RXN-11099	RXN-10030	0.323814
UNIPROT:P08078	UNIPROT:A0A0M2AIG6	0.19242	RXN-11099	3.4.17.14-RXN	0.224175
UNIPROT:P08078	UNIPROT:P75897	0.201729	RXN-11099	RXN-12896	0.110522
UNIPROT:P08078	UNIPROT:Q97U96	0.15508	RXN-11099	ARABINONATE-DEHYDRATASE-RXN	0.218096
UNIPROT:P08078	UNIPROT:Q8KN96	0.156757	RXN-11099	RXN-14782	0.291844
UNIPROT:P08078	UNIPROT:Q8KIC8	0.183417	RXN-11099	RXN-10845	0.639038
UNIPROT:P08078	UNIPROT:Q5V464	0.146006	RXN-11099	RXN-8960	0.217578
UNIPROT:P08078	UNIPROT:A9WC34	0.167598	RXN-11099	RXN-8960	0.217578
UNIPROT:P08078	UNIPROT:D4GYH2	0.184971	RXN-11099	RXN-16598	0.362916
UNIPROT:P08078	UNIPROT:A6UQK8	0.170029	RXN-11099	2.1.1.86-RXN	0.264328
UNIPROT:P08078	UNIPROT:P80651	0.138329	RXN-11099	2.1.1.86-RXN	0.264328
UNIPROT:P08078	UNIPROT:O32867	0.207715	RXN-11099	2.1.1.86-RXN	0.264328
UNIPROT:P08078	UNIPROT:A6UWI0	0.186782	RXN-11099	2.1.1.86-RXN	0.264328
UNIPROT:P08078	UNIPROT:D3E045	0.186782	RXN-11099	2.1.1.86-RXN	0.264328
UNIPROT:P08078	UNIPROT:Q2FRN2	0.214076	RXN-11099	2.1.1.86-RXN	0.264328
UNIPROT:P08078	UNIPROT:P80186	0.17341	RXN-11099	2.1.1.86-RXN	0.264328
UNIPROT:P08078	UNIPROT:O32869	0.177143	RXN-11099	2.1.1.86-RXN	0.264328
UNIPROT:P08078	UNIPROT:Q9Y8K1	0.190202	RXN-11099	2.1.1.86-RXN	0.264328
UNIPROT:P08078	UNIPROT:O32865	0.183673	RXN-11099	2.1.1.86-RXN	0.264328
UNIPROT:P08078	UNIPROT:O59638	0.176301	RXN-11099	2.1.1.86-RXN	0.264328
UNIPROT:P08078	UNIPROT:Q2NI29	0.221264	RXN-11099	2.1.1.86-RXN	0.264328
UNIPROT:P08078	UNIPROT:Q58261	0.198847	RXN-11099	2.1.1.86-RXN	0.264328
UNIPROT:P08078	UNIPROT:Q49176	0.210983	RXN-11099	2.1.1.86-RXN	0.264328
UNIPROT:P08078	UNIPROT:Q58257	0.14121	RXN-11099	2.1.1.86-RXN	0.264328
UNIPROT:P08078	UNIPROT:O27230	0.18732	RXN-11099	2.1.1.86-RXN	0.264328
UNIPROT:P08078	UNIPROT:Q6LWZ3	0.19403	RXN-11099	2.1.1.86-RXN	0.264328
UNIPROT:P08078	UNIPROT:O32864	0.210682	RXN-11099	2.1.1.86-RXN	0.264328
UNIPROT:P08078	UNIPROT:Q49606	0.176812	RXN-11099	2.1.1.86-RXN	0.264328
UNIPROT:P08078	UNIPROT:Q58258	0.193084	RXN-11099	2.1.1.86-RXN	0.264328
UNIPROT:P08078	UNIPROT:D7DUI0	0.170029	RXN-11099	2.1.1.86-RXN	0.264328
UNIPROT:P08078	UNIPROT:P80185	0.195965	RXN-11099	2.1.1.86-RXN	0.264328
UNIPROT:P08078	UNIPROT:P80183	0.190202	RXN-11099	2.1.1.86-RXN	0.264328
UNIPROT:P08078	UNIPROT:Q9WXJ9	0.196532	RXN-11099	RXN-10904	0.198079
UNIPROT:P08078	UNIPROT:Q9I2A0	0.181556	RXN-11099	4.1.3.26-RXN	0.224809
UNIPROT:P08078	UNIPROT:D0E8I4	0.190751	RXN-11099	RXN-15311	0.211432
UNIPROT:P08078	UNIPROT:Q9RR27	0.164265	RXN-11099	RXN-12929	0.871545
UNIPROT:P08078	UNIPROT:G4WJD3	0.156069	RXN-11099	RXN-8955	0.858008
UNIPROT:P08078	UNIPROT:W8CV45	0.130919	RXN-11099	TRYPTOPHAN-DEHYDROGENASE-RXN	0.879406
UNIPROT:P08078	UNIPROT:Q2T5S0	0.228324	RXN-11099	RXN-19533	0.239985
UNIPROT:P08078	UNIPROT:Q56841	0.221264	RXN-11099	1.1.1.269-RXN	0.918577
UNIPROT:P08078	PID:AAY91990	0.131429	RXN-11099	1.1.1.43-RXN	0.908848
UNIPROT:P31112	UNIPROT:P31114	0.207493	RXN-11458	RXN-11458	0
UNIPROT:P31112	UNIPROT:Q50751	0.178191	RXN-11458	RXN-18273	0.153727
UNIPROT:P31112	UNIPROT:W8X5J9	0.101504	RXN-11458	RXN-20145	0.127634
UNIPROT:P31112	UNIPROT:P0A395	0.19888	RXN-11458	RXN-14860	0.840956
UNIPROT:P31112	UNIPROT:Q9AJU2	0.183024	RXN-11458	RXN-15405	0.240812
UNIPROT:P31112	UNIPROT:Q7BUE1	0.184659	RXN-11458	RXN-9578	0.79649
UNIPROT:P31112	UNIPROT:Q9ALN2	0.193955	RXN-11458	RXN-13632	0.239449
UNIPROT:P31112	UNIPROT:B5L3X1	0.148438	RXN-11458	RXN-14557	0.234659
UNIPROT:P31112	UNIPROT:A0QXD8	0.165746	RXN-11458	RXN-17764	0.877324
UNIPROT:P31112	UNIPROT:Q5V468	0.176768	RXN-11458	RXN-12168	0.156173
UNIPROT:P31112	UNIPROT:H2IFX0	0.168508	RXN-11458	RXN-15893	0.273016
UNIPROT:P31112	UNIPROT:Q5LLW6	0.123134	RXN-11458	RXN-16010	0.229108
UNIPROT:P31112	UNIPROT:P70473	0.210526	RXN-11458	RXN-9797	0.250219
UNIPROT:P31112	UNIPROT:Q2MF63	0.190476	RXN-11458	RXN-13209	0.238804
UNIPROT:P31112	UNIPROT:Q59523	0.188917	RXN-11458	RXN-15050	0.69554
UNIPROT:P31112	UNIPROT:V5TDY7	0.161491	RXN-11458	RXN-19276	0.165441
UNIPROT:P31112	UNIPROT:P14168	0.179211	RXN-11458	RXN-9159	0.796627
UNIPROT:P31112	UNIPROT:Q04809	0.188552	RXN-11458	RXN-5041	0.842201
UNIPROT:P31112	UNIPROT:Q97YM2	0.196581	RXN-11458	RXN-8776	0.869543
UNIPROT:P31112	UNIPROT:Q88J56	0.18509	RXN-11458	RXN-19190	0.230198
UNIPROT:P31112	UNIPROT:Q46N54	0.117871	RXN-11458	RXN-11728	0.871025
UNIPROT:P31112	UNIPROT:P18623	0.185315	RXN-11458	VIOMYCIN-KINASE-RXN	0.252172
UNIPROT:P31112	UNIPROT:Q5VJ89	0.2	RXN-11458	RXN-8697	0.879514
UNIPROT:P31112	UNIPROT:P22441	0.158088	RXN-11458	N-ACYLMANNOSAMINE-1-DEHYDROGENASE-RXN	0.860878
UNIPROT:P31112	UNIPROT:Q8NMA4	0.119691	RXN-11458	ACETOINDEHYDROG-RXN	0.88027
UNIPROT:P31112	UNIPROT:Q9LBG2	0.128302	RXN-11458	RXN-19806	0.866092
UNIPROT:P31112	UNIPROT:Q59111	0.18125	RXN-11458	RXN-1082	0.142449
UNIPROT:P31112	UNIPROT:Q59112	0.134328	RXN-11458	RXN-1082	0.142449
UNIPROT:P31112	UNIPROT:P26172	0.197436	RXN-11458	RXN-17427	0.273617
UNIPROT:P31112	UNIPROT:B2J4A4	0.179567	RXN-11458	RXN-12824	0.295595
UNIPROT:P31112	UNIPROT:Q58379	0.154982	RXN-11458	RXN-11782	0.384757
UNIPROT:P31112	UNIPROT:Q2FUB2	0.166667	RXN-11458	RXN-11782	0.384757
UNIPROT:P31112	UNIPROT:Q5JHF1	0.183333	RXN-11458	RXN-11782	0.384757
UNIPROT:P31112	UNIPROT:Q939Q3	0.202454	RXN-11458	RXN-16566	0.795256
UNIPROT:P31112	UNIPROT:Q9RFR0	0.186398	RXN-11458	RXN-8849	0.304012
UNIPROT:P31112	UNIPROT:F1CWE5	0.141264	RXN-11458	RXN-16588	0.196894
UNIPROT:P31112	UNIPROT:P16689	0.205882	RXN-11458	RXN-17955	0.225271
UNIPROT:P31112	UNIPROT:V5TDH1	0.164557	RXN-11458	RXN-19287	0.207662
UNIPROT:P31112	UNIPROT:P76472	0.175676	RXN-11458	RXN0-5409	0.171004
UNIPROT:P31112	UNIPROT:Q9Z9I9	0.186747	RXN-11458	RXN-10896	0.185552
UNIPROT:P31112	UNIPROT:Q56863	0.189003	RXN-11458	RXN-21377	0.795969
UNIPROT:P31112	UNIPROT:B1W019	0.176647	RXN-11458	RXN-12774	0.291482
UNIPROT:P31112	UNIPROT:Q0ZQ43	0.140351	RXN-11458	RXN-15080	0.254085
UNIPROT:P31112	UNIPROT:E7BBN5	0.201729	RXN-11458	RXN-18505	0.270241
UNIPROT:P31112	UNIPROT:Q9RA05	0.196364	RXN-11458	RXN-9401	0.196353
UNIPROT:P31112	UNIPROT:A0A348BF02	0.212598	RXN-11458	RXN-20901	0.183893
UNIPROT:P31112	UNIPROT:Q715L4	0.142336	RXN-11458	PHLORETIN-HYDROLASE-RXN	0.189345
UNIPROT:P31112	UNIPROT:L7RFF8	0.176471	RXN-11458	RXN-20921	0.198341
UNIPROT:P31112	UNIPROT:L7VFM4	0.154639	RXN-11458	RXN-15576	0.264268
UNIPROT:P31112	UNIPROT:A0A0H3PBA7	0.2149	RXN-11458	RXN-16162	0.781914
UNIPROT:P31112	UNIPROT:Q9EX73	0.172297	RXN-11458	RXN-9432	0.212162
UNIPROT:P31112	UNIPROT:C7PLV2	0.186916	RXN-11458	RXN-11906	0.287817
UNIPROT:P31112	UNIPROT:M1VDX3	0.195335	RXN-11458	RXN-15708	0.199773
UNIPROT:P31112	UNIPROT:Q92CR1	0.151751	RXN-11458	RXN-19372	0.347159
UNIPROT:P31112	UNIPROT:D7PHZ7	0.156863	RXN-11458	RXN-16581	0.267019
UNIPROT:P31112	UNIPROT:E3PY99	0.200573	RXN-11458	RXN-18500	0.885426
UNIPROT:P31112	UNIPROT:Q9ZET3	0.187683	RXN-11458	RXN-17588	0.879928
UNIPROT:P31112	UNIPROT:Q8RR26	0.154676	RXN-11458	RXN-21004	0.145841
UNIPROT:P31112	UNIPROT:Q8RR28	0.154386	RXN-11458	RXN-21004	0.145841
UNIPROT:P31112	UNIPROT:Q8KN33	0.166134	RXN-11458	RXN0-7010	0.156316
UNIPROT:P31112	UNIPROT:P42620	0.198171	RXN-11458	RXN0-7010	0.156316
UNIPROT:P31112	UNIPROT:D2KTX1	0.124514	RXN-11458	RXN-17143	0.86623
UNIPROT:P31112	UNIPROT:Q2LXU6	0.111969	RXN-11458	4.2.1.100-RXN	0.178689
UNIPROT:P31112	UNIPROT:O87873	0.155894	RXN-11458	4.2.1.100-RXN	0.178689
UNIPROT:P31112	UNIPROT:A0A0H5BN57	0.176471	RXN-11458	RXN-18984	0.198965
UNIPROT:P31112	UNIPROT:A0A0H5BN61	0.195652	RXN-11458	RXN-18984	0.198965
UNIPROT:P31112	UNIPROT:Q88JX9	0.142857	RXN-11458	RXN-2464	0.279395
UNIPROT:P31112	UNIPROT:Q9AQI0	0.156	RXN-11458	RXN-2464	0.279395
UNIPROT:P31112	UNIPROT:P40011	0.167331	RXN-11458	RXN-2464	0.279395
UNIPROT:P31112	UNIPROT:A5W059	0.126482	RXN-11458	RXN-2464	0.279395
UNIPROT:P31112	UNIPROT:Q9KBI9	0.17004	RXN-11458	RXN-2464	0.279395
UNIPROT:P31112	UNIPROT:Q194Q5	0.0944882	RXN-11458	RXN-12932	0.791282
UNIPROT:P31112	UNIPROT:O24721	0.194805	RXN-11458	1.13.11.38-RXN	0.231377
UNIPROT:P31112	UNIPROT:B0FXI4	0.152344	RXN-11458	RXN-3941	0.823076
UNIPROT:P31112	UNIPROT:A0A0A1GNF2	0.170648	RXN-11458	RXN-16711	0.11522
UNIPROT:P31112	UNIPROT:P22868	0.205202	RXN-11458	METHANE-MONOOXYGENASE-RXN	0.883791
UNIPROT:P31112	UNIPROT:Q53563	0.197059	RXN-11458	METHANE-MONOOXYGENASE-RXN	0.883791
UNIPROT:P31112	UNIPROT:P27354	0.19797	RXN-11458	METHANE-MONOOXYGENASE-RXN	0.883791
UNIPROT:P31112	UNIPROT:P18798	0.232558	RXN-11458	METHANE-MONOOXYGENASE-RXN	0.883791
UNIPROT:P31112	UNIPROT:Q8G9L1	0.177898	RXN-11458	RXN-10123	0.224361
UNIPROT:P31112	UNIPROT:Q9AH03	0.17765	RXN-11458	RXN-16305	0.248399
UNIPROT:P31112	UNIPROT:Q2VEQ7	0.167213	RXN-11458	1.1.1.272-RXN	0.880737
UNIPROT:P31112	UNIPROT:G5CN54	0.134831	RXN-11458	RXN-14019	0.702487
UNIPROT:P31112	UNIPROT:O24963	0.163763	RXN-11458	RXN-10622	0.217697
UNIPROT:P31112	UNIPROT:Q9KXN1	0.143885	RXN-11458	RXN-10622	0.217697
UNIPROT:P31112	UNIPROT:A9CEQ8	0.177249	RXN-11458	RXN-15907	0.266615
UNIPROT:P31112	UNIPROT:Q9L4X0	0.207161	RXN-11458	RXN-16254	0.774562
UNIPROT:P31112	UNIPROT:D2Z024	0.153558	RXN-11458	RXN-12537	0.263892
UNIPROT:P31112	UNIPROT:Q54528	0.157191	RXN-11458	RXN-14863	0.166681
UNIPROT:P31112	UNIPROT:P95137	0.168224	RXN-11458	RXN-17284	0.239059
UNIPROT:P31112	UNIPROT:I6X9J4	0.180556	RXN-11458	1.13.11.14-RXN	0.263537
UNIPROT:P31112	UNIPROT:Q51976	0.198718	RXN-11458	1.13.11.14-RXN	0.263537
UNIPROT:P31112	UNIPROT:Q51718	0.154676	RXN-11458	3.1.1.76-RXN	0.250219
UNIPROT:P31112	UNIPROT:Q8KQ22	0.178947	RXN-11458	3.1.1.76-RXN	0.250219
UNIPROT:P31112	UNIPROT:Q643C1	0.169643	RXN-11458	RXN-14541	0.288776
UNIPROT:P31112	PID:BAV89210	0.126437	RXN-11458	RXN0-5180	0.139084
UNIPROT:P31112	UNIPROT:Q948Q0	0.162069	RXN-11458	RXN0-5180	0.139084
UNIPROT:P31112	UNIPROT:E2GIN1	0.150198	RXN-11458	RXN-13635	0.299226
UNIPROT:P31112	UNIPROT:C9K1X5	0.169381	RXN-11458	RXN-15429	0.205478
UNIPROT:P31112	UNIPROT:P07639	0.199446	RXN-11458	RXN-20673	0.21519
UNIPROT:P31112	UNIPROT:P39644	0.141221	RXN-11458	RXN-16298	0.885426
UNIPROT:P31112	UNIPROT:F2RB78	0.169753	RXN-11458	RXN-20193	0.836618
UNIPROT:P31112	UNIPROT:Q53U11	0.156164	RXN-11458	RXN-13176	0.236197
UNIPROT:P31112	UNIPROT:P29379	0.123506	RXN-11458	R310-RXN	0.243935
UNIPROT:P31112	UNIPROT:Q53117	0.123016	RXN-11458	R310-RXN	0.243935
UNIPROT:P31112	UNIPROT:P21220	0.123506	RXN-11458	R310-RXN	0.243935
UNIPROT:P31112	UNIPROT:P97052	0.190476	RXN-11458	R310-RXN	0.243935
UNIPROT:P31112	UNIPROT:P27763	0.179283	RXN-11458	R310-RXN	0.243935
UNIPROT:P31112	UNIPROT:P97051	0.159363	RXN-11458	R310-RXN	0.243935
UNIPROT:P31112	UNIPROT:P29378	0.143426	RXN-11458	R310-RXN	0.243935
UNIPROT:P31112	UNIPROT:P13448	0.179283	RXN-11458	R310-RXN	0.243935
UNIPROT:P31112	UNIPROT:B4ER98	0.131474	RXN-11458	RXN-20237	0.259168
UNIPROT:P31112	UNIPROT:A9CEQ7	0.190476	RXN-11458	RXN-15901	0.246525
UNIPROT:P31112	UNIPROT:O87697	0.190608	RXN-11458	RXN-8763	0.153384
UNIPROT:P31112	UNIPROT:Q58544	0.198142	RXN-11458	RXN-8763	0.153384
UNIPROT:P31112	UNIPROT:Q05631	0.201149	RXN-11458	RXN-8763	0.153384
UNIPROT:P31112	UNIPROT:A0A286SC67	0.219718	RXN-11458	RXN-20259	0.231638
UNIPROT:P31112	UNIPROT:Q9AJU0	0.133588	RXN-11458	RXN-15403	0.231656
UNIPROT:P31112	UNIPROT:Q9RAH6	0.146179	RXN-11458	RXN-17837	0.15957
UNIPROT:P31112	UNIPROT:P0AE22	0.167331	RXN-11458	RXN-14534	0.256732
UNIPROT:P31112	UNIPROT:Q9ALN3	0.180212	RXN-11458	RXN-13630	0.17908
UNIPROT:P31112	UNIPROT:I6YER9	0.123506	RXN-11458	RXN-15423	0.272805
UNIPROT:P31112	UNIPROT:A7B3K3	0.0984252	RXN-11458	RXN-17412	0.81366
UNIPROT:P31112	UNIPROT:E4N7E5	0.162939	RXN-11458	RXN-18790	0.254559
UNIPROT:P31112	UNIPROT:H2E7T7	0.21164	RXN-11458	RXN-13283	0.22808
UNIPROT:P31112	UNIPROT:Q8GRC8	0.19171	RXN-11458	RXN-11768	0.284016
UNIPROT:P31112	UNIPROT:Q9ZFV4	0.200743	RXN-11458	RXN-19333	0.159069
UNIPROT:P31112	UNIPROT:E5Y946	0.183463	RXN-11458	RXN-20702	0.232949
UNIPROT:P31112	UNIPROT:Q82RR7	0.191045	RXN-11458	RXN-12831	0.26038
UNIPROT:P31112	UNIPROT:Q00870	0.203438	RXN-11458	KIEVITONE-HYDRATASE-RXN	0.163519
UNIPROT:P31112	UNIPROT:F8J3H2	0.163265	RXN-11458	RXN-17563	0.172502
UNIPROT:P31112	UNIPROT:Q8T882	0.209596	RXN-11458	TAUROPINE-DEHYDROGENASE-RXN	0.850193
UNIPROT:P31112	UNIPROT:Q60FC7	0.209581	RXN-11458	TAUROPINE-DEHYDROGENASE-RXN	0.850193
UNIPROT:P31112	UNIPROT:Q56778	0.121212	RXN-11458	RXN-11802	0.163475
UNIPROT:P31112	UNIPROT:P0DOV6	0.151203	RXN-11458	RXN-17095	0.225921
UNIPROT:P31112	UNIPROT:O34707	0.201102	RXN-11458	RXN-13337	0.145503
UNIPROT:P31112	UNIPROT:Q6XBI8	0.189112	RXN-11458	RXN-17580	0.88603
UNIPROT:P31112	UNIPROT:E1XUJ2	0.20202	RXN-11458	RXN-12335	0.211749
UNIPROT:P31112	UNIPROT:D0ZLR3	0.215259	RXN-11458	RXN-14730	0.255995
UNIPROT:P31112	UNIPROT:A9CK30	0.117647	RXN-11458	RXN-9936	0.256429
UNIPROT:P31112	UNIPROT:D7R619	0.19802	RXN-11458	RXN-12902	0.258164
UNIPROT:P31112	UNIPROT:D7R620	0.158103	RXN-11458	RXN-12902	0.258164
UNIPROT:P31112	UNIPROT:A2SP37	0.180822	RXN-11458	RXN-17613	0.874455
UNIPROT:P31112	UNIPROT:Q59M69	0.202128	RXN-11458	4.2.1.93-RXN	0.300874
UNIPROT:P31112	UNIPROT:C5Y210	0.213514	RXN-11458	4.2.1.93-RXN	0.300874
UNIPROT:P31112	UNIPROT:P36059	0.204748	RXN-11458	4.2.1.93-RXN	0.300874
UNIPROT:P31112	UNIPROT:A9RY03	0.173021	RXN-11458	4.2.1.93-RXN	0.300874
UNIPROT:P31112	UNIPROT:Q9VVW8	0.166667	RXN-11458	4.2.1.93-RXN	0.300874
UNIPROT:P31112	UNIPROT:Q5K8L4	0.183844	RXN-11458	4.2.1.93-RXN	0.300874
UNIPROT:P31112	UNIPROT:E3LAQ9	0.192893	RXN-11458	4.2.1.93-RXN	0.300874
UNIPROT:P31112	UNIPROT:Q5B0D6	0.220994	RXN-11458	4.2.1.93-RXN	0.300874
UNIPROT:P31112	UNIPROT:F6RCC2	0.178273	RXN-11458	4.2.1.93-RXN	0.300874
UNIPROT:P31112	UNIPROT:C0NFV9	0.213699	RXN-11458	4.2.1.93-RXN	0.300874
UNIPROT:P31112	UNIPROT:B7PBI5	0.161716	RXN-11458	4.2.1.93-RXN	0.300874
UNIPROT:P31112	UNIPROT:E0VSF4	0.177258	RXN-11458	4.2.1.93-RXN	0.300874
UNIPROT:P31112	PID:BAA91797	0.208226	RXN-11458	4.2.1.93-RXN	0.300874
UNIPROT:P31112	UNIPROT:C4LZV8	0.19	RXN-11458	4.2.1.93-RXN	0.300874
UNIPROT:P31112	UNIPROT:Q17NP0	0.169184	RXN-11458	4.2.1.93-RXN	0.300874
UNIPROT:P31112	UNIPROT:A7RRZ8	0.213483	RXN-11458	4.2.1.93-RXN	0.300874
UNIPROT:P31112	UNIPROT:O94347	0.180428	RXN-11458	4.2.1.93-RXN	0.300874
UNIPROT:P31112	UNIPROT:B7FXE8	0.190323	RXN-11458	4.2.1.93-RXN	0.300874
UNIPROT:P31112	UNIPROT:Q4P219	0.203488	RXN-11458	4.2.1.93-RXN	0.300874
UNIPROT:P31112	UNIPROT:A8X354	0.175896	RXN-11458	4.2.1.93-RXN	0.300874
UNIPROT:P31112	UNIPROT:F4NZ38	0.18239	RXN-11458	4.2.1.93-RXN	0.300874
UNIPROT:P31112	UNIPROT:A8N8Z0	0.188623	RXN-11458	4.2.1.93-RXN	0.300874
UNIPROT:P31112	UNIPROT:Q7SHU9	0.205128	RXN-11458	4.2.1.93-RXN	0.300874
UNIPROT:P31112	UNIPROT:Q9XB59	0.155797	RXN-11458	RXN-8949	0.274907
UNIPROT:P31112	UNIPROT:Q05182	0.191358	RXN-11458	PHTHALATE-45-DIOXYGENASE-RXN	0.849822
UNIPROT:P31112	UNIPROT:P55818	0.152249	RXN-11458	RXN-2883	0.69334
UNIPROT:P31112	UNIPROT:O85012	0.151515	RXN-11458	RXN-2883	0.69334
UNIPROT:P31112	UNIPROT:Q5U914	0.156	RXN-11458	RXN-11984	0.212329
UNIPROT:P31112	UNIPROT:A0A4Y1MT04	0.194373	RXN-11458	GLUTARATE--COA-LIGASE-RXN	0.241145
UNIPROT:P31112	UNIPROT:A9WLH9	0.144531	RXN-11458	GLUTARATE--COA-LIGASE-RXN	0.241145
UNIPROT:P31112	UNIPROT:S7SR96	0.204545	RXN-11458	GLUTARATE--COA-LIGASE-RXN	0.241145
UNIPROT:P31112	UNIPROT:P39849	0.172131	RXN-11458	RXN-8581	0.886941
UNIPROT:P31112	UNIPROT:O52791	0.209632	RXN-11458	1.13.11.46-RXN	0.256659
UNIPROT:P31112	UNIPROT:Q9C6I4	0.209091	RXN-11458	RXN-115	0.253245
UNIPROT:P31112	PID:AAN87571	0.176119	RXN-11458	RXN-115	0.253245
UNIPROT:P31112	UNIPROT:Q9SQ80	0.172414	RXN-11458	RXN-115	0.253245
UNIPROT:P31112	UNIPROT:Q5ZA21	0.166213	RXN-11458	RXN-115	0.253245
UNIPROT:P31112	PID:O64692	0.164671	RXN-11458	RXN-115	0.253245
UNIPROT:P31112	PID:AAN87572	0.18541	RXN-11458	RXN-115	0.253245
UNIPROT:P31112	UNIPROT:Q8S0S6	0.177914	RXN-11458	RXN-115	0.253245
UNIPROT:P31112	UNIPROT:O49561	0.197015	RXN-11458	RXN-115	0.253245
UNIPROT:P31112	UNIPROT:Q9C7Z1	0.183801	RXN-11458	RXN-115	0.253245
UNIPROT:P31112	UNIPROT:Q7XP65	0.169014	RXN-11458	RXN-115	0.253245
UNIPROT:P31112	UNIPROT:Q8LGZ9	0.20649	RXN-11458	RXN-115	0.253245
UNIPROT:P31112	UNIPROT:Q841K9	0.181009	RXN-11458	RXN-15942	0.25039
UNIPROT:P31112	UNIPROT:P15006	0.20977	RXN-11458	RXN0-2941	0.410051
UNIPROT:P31112	UNIPROT:Q83WF5	0.188144	RXN-11458	RXN-15053	0.806412
UNIPROT:P31112	UNIPROT:A0A452CSY6	0.181818	RXN-11458	2.7.99.1-RXN	0.241259
UNIPROT:P31112	UNIPROT:P00458	0.181507	RXN-11458	NITROGENASE-FLAVODOXIN-RXN	0.332305
UNIPROT:P31112	UNIPROT:P00459	0.165517	RXN-11458	NITROGENASE-FLAVODOXIN-RXN	0.332305
UNIPROT:P31112	UNIPROT:P0A8T1	0.190476	RXN-11458	RXN0-5419	0.37189
UNIPROT:P31112	UNIPROT:B2J8P8	0.210797	RXN-11458	RXN-14462	0.333995
UNIPROT:P31112	UNIPROT:Q9I6K2	0.160377	RXN-11458	GUANIDINOPROPIONASE-RXN	0.236989
UNIPROT:P31112	UNIPROT:Q83YH7	0.201571	RXN-11458	RXN-10668	0.231675
UNIPROT:P31112	UNIPROT:O87871	0.173077	RXN-11458	HADTHAUERA-RXN	0.714625
UNIPROT:P31112	UNIPROT:A9IE89	0.16092	RXN-11458	RXN-13638	0.278705
UNIPROT:P31112	UNIPROT:P37749	0.187692	RXN-11458	RXN0-5210	0.284572
UNIPROT:P31112	UNIPROT:Q9F834	0.167683	RXN-11458	RXN-13660	0.787511
UNIPROT:P31112	UNIPROT:P27099	0.203252	RXN-11458	RXN-18360	0.239506
UNIPROT:P31112	UNIPROT:Q8GMW5	0.128788	RXN-11458	RXN-8747	0.225634
UNIPROT:P31112	UNIPROT:E3UBL6	0.115079	RXN-11458	RXN-15498	0.183712
UNIPROT:P31112	UNIPROT:P73538	0.189944	RXN-11458	RXN-17473	0.189383
UNIPROT:P31112	UNIPROT:P12996	0.19883	RXN-11458	RXN-17473	0.189383
UNIPROT:P31112	UNIPROT:Q70GK9	0.190635	RXN-11458	2.5.1.63-RXN	0.212827
UNIPROT:P31112	UNIPROT:J9QS25	0.194444	RXN-11458	RXN-13763	0.291482
UNIPROT:P31112	UNIPROT:B2J1M1	0.166667	RXN-11458	RXN-13286	0.252526
UNIPROT:P31112	UNIPROT:Q6J1Z5	0.132841	RXN-11458	RXN-8836	0.242125
UNIPROT:P31112	UNIPROT:Q6J1Z6	0.163462	RXN-11458	RXN-8836	0.242125
UNIPROT:P31112	UNIPROT:P94681	0.116732	RXN-11458	SYDDEHYD-RXN	0.870355
UNIPROT:P31112	UNIPROT:P0DOV8	0.0933852	RXN-11458	RXN-17098	0.234436
UNIPROT:P31112	UNIPROT:E4MYY0	0.189911	RXN-11458	RXN-18944	0.27867
UNIPROT:P31112	UNIPROT:Q6TFC6	0.149254	RXN-11458	RXN-14735	0.245606
UNIPROT:P31112	UNIPROT:P30347	0.123552	RXN-11458	RXN-10902	0.18104
UNIPROT:P31112	UNIPROT:Q0PCR8	0.1875	RXN-11458	RXN-14755	0.438458
UNIPROT:P31112	UNIPROT:O82872	0.18883	RXN-11458	4.1.2.42-RXN	0.269665
UNIPROT:P31112	UNIPROT:E3EJK4	0.184971	RXN-11458	RXN-15664	0.864054
UNIPROT:P31112	UNIPROT:A7Z0T4	0.171014	RXN-11458	RXN-15664	0.864054
UNIPROT:P31112	UNIPROT:Q59093	0.146067	RXN-11458	RXN-10083	0.255716
UNIPROT:P31112	UNIPROT:P00632	0.133333	RXN-11458	RXN-10083	0.255716
UNIPROT:P31112	UNIPROT:Q0P8I6	0.199422	RXN-11458	RXN-16169	0.781914
UNIPROT:P31112	UNIPROT:P48635	0.197436	RXN-11458	RXN-12926	0.774873
UNIPROT:P31112	UNIPROT:Q8G9L3	0.124031	RXN-11458	RXN-10118	0.253124
UNIPROT:P31112	UNIPROT:D2PPM8	0.176623	RXN-11458	RXN-18147	0.257781
UNIPROT:P31112	UNIPROT:Q9LBJ0	0.113725	RXN-11458	RXN-19530	0.313558
UNIPROT:P31112	UNIPROT:Q6E7F2	0.205696	RXN-11458	1.1.1.266-RXN	0.795089
UNIPROT:P31112	UNIPROT:A2BD24	0.202614	RXN-11458	1.1.1.266-RXN	0.795089
UNIPROT:P31112	UNIPROT:Q51979	0.140625	RXN-11458	RXN-667	0.251813
UNIPROT:P31112	UNIPROT:M1T9N7	0.182635	RXN-11458	RXN-11456	0.37189
UNIPROT:P31112	UNIPROT:D5FKJ3	0.205714	RXN-11458	RXN-11456	0.37189
UNIPROT:P31112	UNIPROT:Q9F7D8	0.190341	RXN-11458	6-HYDROXYHEXANOATE-OXIDATION-RXN	0.86571
UNIPROT:P31112	UNIPROT:O31041	0.14	RXN-11458	RXN-21079	0.255621
UNIPROT:P31112	UNIPROT:B3TZD8	0.203125	RXN-11458	RXN-15363	0.253593
UNIPROT:P31112	UNIPROT:B3TZD9	0.15411	RXN-11458	RXN-15363	0.253593
UNIPROT:P31112	UNIPROT:Q8ZKR2	0.178683	RXN-11458	RXN-19750	0.371961
UNIPROT:P31112	UNIPROT:P0ABQ2	0.153061	RXN-11458	RXN0-5289	0.877905
UNIPROT:P31112	UNIPROT:P77161	0.202055	RXN-11458	RXN0-5289	0.877905
UNIPROT:P31112	UNIPROT:Q9I5I6	0.171717	RXN-11458	RXN-16008	0.873691
UNIPROT:P31112	UNIPROT:Q3SLJ4	0.145329	RXN-11458	RXN-9230	0.118051
UNIPROT:P31112	UNIPROT:Q3IHW5	0.160959	RXN-11458	RXN-9230	0.118051
UNIPROT:P31112	UNIPROT:A1KSZ7	0.168919	RXN-11458	RXN-9230	0.118051
UNIPROT:P31112	UNIPROT:Q6D9I8	0.170732	RXN-11458	RXN-9230	0.118051
UNIPROT:P31112	UNIPROT:Q499N4	0.192513	RXN-11458	RXN-9230	0.118051
UNIPROT:P31112	UNIPROT:Q6F9N8	0.162069	RXN-11458	RXN-9230	0.118051
UNIPROT:P31112	UNIPROT:Q3IZ43	0.169697	RXN-11458	RXN-9230	0.118051
UNIPROT:P31112	UNIPROT:A2SMA7	0.164474	RXN-11458	RXN-9230	0.118051
UNIPROT:P31112	UNIPROT:P32378	0.178378	RXN-11458	RXN-9230	0.118051
UNIPROT:P31112	UNIPROT:Q8DD49	0.151408	RXN-11458	RXN-9230	0.118051
UNIPROT:P31112	UNIPROT:A4SZT5	0.167247	RXN-11458	RXN-9230	0.118051
UNIPROT:P31112	UNIPROT:Q1GXB3	0.182432	RXN-11458	RXN-9230	0.118051
UNIPROT:P31112	UNIPROT:A5CXV6	0.158088	RXN-11458	RXN-9230	0.118051
UNIPROT:P31112	UNIPROT:Q8PQD5	0.179402	RXN-11458	RXN-9230	0.118051
UNIPROT:P31112	UNIPROT:Q10252	0.186111	RXN-11458	RXN-9230	0.118051
UNIPROT:P31112	UNIPROT:Q298G6	0.201511	RXN-11458	RXN-9230	0.118051
UNIPROT:P31112	UNIPROT:Q82TP2	0.170648	RXN-11458	RXN-9230	0.118051
UNIPROT:P31112	UNIPROT:Q47J11	0.178451	RXN-11458	RXN-9230	0.118051
UNIPROT:P31112	UNIPROT:Q0A5V9	0.167235	RXN-11458	RXN-9230	0.118051
UNIPROT:P31112	UNIPROT:Q1Q996	0.172638	RXN-11458	RXN-9230	0.118051
UNIPROT:P31112	UNIPROT:Q5P5M0	0.170068	RXN-11458	RXN-9230	0.118051
UNIPROT:P31112	UNIPROT:Q6LVS3	0.156794	RXN-11458	RXN-9230	0.118051
UNIPROT:P31112	UNIPROT:Q3JBS8	0.185965	RXN-11458	RXN-9230	0.118051
UNIPROT:P31112	UNIPROT:Q2NR07	0.165517	RXN-11458	RXN-9230	0.118051
UNIPROT:P31112	UNIPROT:A1T087	0.178947	RXN-11458	RXN-9230	0.118051
UNIPROT:P31112	UNIPROT:Q1LJ64	0.173469	RXN-11458	RXN-9230	0.118051
UNIPROT:P31112	UNIPROT:Q2SNV5	0.163333	RXN-11458	RXN-9230	0.118051
UNIPROT:P31112	UNIPROT:Q8I7J4	0.174157	RXN-11458	RXN-9230	0.118051
UNIPROT:P31112	UNIPROT:Q5QUP3	0.163121	RXN-11458	RXN-9230	0.118051
UNIPROT:P31112	UNIPROT:Q21S73	0.167808	RXN-11458	RXN-9230	0.118051
UNIPROT:P31112	UNIPROT:B0U2A2	0.170648	RXN-11458	RXN-9230	0.118051
UNIPROT:P31112	UNIPROT:Q494A7	0.149306	RXN-11458	RXN-9230	0.118051
UNIPROT:P31112	UNIPROT:Q5WWR8	0.189286	RXN-11458	RXN-9230	0.118051
UNIPROT:P31112	UNIPROT:Q0VTA7	0.14433	RXN-11458	RXN-9230	0.118051
UNIPROT:P31112	UNIPROT:Q31DM4	0.17193	RXN-11458	RXN-9230	0.118051
UNIPROT:P31112	UNIPROT:A9KGW7	0.163763	RXN-11458	RXN-9230	0.118051
UNIPROT:P31112	UNIPROT:Q1QSG2	0.158249	RXN-11458	RXN-9230	0.118051
UNIPROT:P31112	UNIPROT:Q2Y5S3	0.16955	RXN-11458	RXN-9230	0.118051
UNIPROT:P31112	PID:AAH20728	0.190104	RXN-11458	RXN-9230	0.118051
UNIPROT:P31112	UNIPROT:A1WKC0	0.149153	RXN-11458	RXN-9230	0.118051
UNIPROT:P31112	UNIPROT:A4VGN3	0.177852	RXN-11458	RXN-9230	0.118051
UNIPROT:P31112	UNIPROT:Q608Z9	0.150685	RXN-11458	RXN-9230	0.118051
UNIPROT:P31112	UNIPROT:Q12S01	0.183673	RXN-11458	RXN-9230	0.118051
UNIPROT:P31112	UNIPROT:Q55500	0.151724	RXN-11458	RXN-9230	0.118051
UNIPROT:P31112	UNIPROT:B0BPA2	0.163823	RXN-11458	RXN-9230	0.118051
UNIPROT:P31112	UNIPROT:Q21DY7	0.189369	RXN-11458	RXN-9230	0.118051
UNIPROT:P31112	UNIPROT:Q8KQL2	0.196581	RXN-11458	RXN-11107	0.862676
UNIPROT:P31112	UNIPROT:Q92V74	0.194667	RXN-11458	RXN-17958	0.236626
UNIPROT:P31112	UNIPROT:Q84CG1	0.197943	RXN-11458	RXN-14636	0.250219
UNIPROT:P31112	UNIPROT:P27240	0.16996	RXN-11458	RXN0-5123	0.173777
UNIPROT:P31112	UNIPROT:P18204	0.197468	RXN-11458	INDOLEACETATE--LYSINE-LIGASE-RXN	0.334658
UNIPROT:P31112	UNIPROT:P0DPK6	0.178771	RXN-11458	RXN-18785	0.193835
UNIPROT:P31112	UNIPROT:Q54376	0.172956	RXN-11458	RXN-21205	0.320367
UNIPROT:P31112	UNIPROT:O07457	0.150579	RXN-11458	R267-RXN	0.717229
UNIPROT:P31112	UNIPROT:Q70KH3	0.112	RXN-11458	RXN-20209	0.276828
UNIPROT:P31112	UNIPROT:Q83WF2	0.186869	RXN-11458	RXN-12801	0.236097
UNIPROT:P31112	UNIPROT:Q46856	0.19171	RXN-11458	RXN0-6487	0.877848
UNIPROT:P31112	UNIPROT:D2B747	0.179331	RXN-11458	RXN-18824	0.264199
UNIPROT:P31112	UNIPROT:A4UVY1	0.163347	RXN-11458	RXN-8847	0.865729
UNIPROT:P31112	UNIPROT:Q8KES3	0.146245	RXN-11458	RXN-13222	0.850636
UNIPROT:P31112	UNIPROT:Q09927	0.182186	RXN-11458	RXN-19375	0.322902
UNIPROT:P31112	UNIPROT:E9P8D2	0.156	RXN-11458	RXN-19375	0.322902
UNIPROT:P31112	UNIPROT:O81884	0.172414	RXN-11458	RXN-1884	0.863557
UNIPROT:P31112	UNIPROT:B9W4V6	0.208672	RXN-11458	RXN-11814	0.261148
UNIPROT:P31112	UNIPROT:P95748	0.124514	RXN-11458	RXN-12772	0.246384
UNIPROT:P31112	UNIPROT:Q44297	0.184874	RXN-11458	1.5.1.28-RXN	0.839352
UNIPROT:P31112	UNIPROT:P23133	0.172043	RXN-11458	2-OH-6-OXOHEPTA-2-4-DIENOATE-HYDR-RXN	0.231964
UNIPROT:P31112	UNIPROT:Q4JZE6	0.159363	RXN-11458	RXN-13745	0.234911
UNIPROT:P31112	UNIPROT:G2IMF2	0.158228	RXN-11458	RXN-19408	0.79417
UNIPROT:P31112	UNIPROT:B6EHB9	0.216763	RXN-11458	RXN-15654	0.213191
UNIPROT:P31112	UNIPROT:A0A9I9	0.190955	RXN-11458	STROMBINE-DEHYDROGENASE-RXN	0.876266
UNIPROT:P31112	UNIPROT:Q0P9D3	0.202073	RXN-11458	RXN-12812	0.201968
UNIPROT:P31112	UNIPROT:A0A0D4BS80	0.15415	RXN-11458	RXN-17532	0.15348
UNIPROT:P31112	UNIPROT:E9NPJ4	0.165468	RXN-11458	RXN-20454	0.238557
UNIPROT:P31112	UNIPROT:P72140	0.180851	RXN-11458	RXN-14783	0.250219
UNIPROT:P31112	UNIPROT:Q9I1Q2	0.196891	RXN-11458	RXN-15590	0.27977
UNIPROT:P31112	UNIPROT:M1V9Q0	0.186486	RXN-11458	RXN-15706	0.20543
UNIPROT:P31112	UNIPROT:Q56779	0.148289	RXN-11458	RXN-11792	0.241422
UNIPROT:P31112	UNIPROT:Q44577	0.139442	RXN-11458	RXN-11792	0.241422
UNIPROT:P31112	UNIPROT:Q8RL55	0.153094	RXN-11458	RXN-19875	0.166688
UNIPROT:P31112	UNIPROT:P50197	0.122047	RXN-11458	LINC-RXN	0.860602
UNIPROT:P31112	UNIPROT:A0A0M3WRK0	0.133779	RXN-11458	RXN-17198	0.188644
UNIPROT:P31112	UNIPROT:Q9WYP4	0.173633	RXN-11458	RXN-14359	0.284341
UNIPROT:P31112	UNIPROT:Q44250	0.12253	RXN-11458	RXN-15251	0.289064
UNIPROT:P31112	UNIPROT:Q607G3	0.117647	RXN-11458	RXN-17664	0.887563
UNIPROT:P31112	UNIPROT:D4GYH3	0.179487	RXN-11458	RXN-16599	0.331754
UNIPROT:P31112	UNIPROT:Q7WYU8	0.187879	RXN-11458	RXN-10889	0.283608
UNIPROT:P31112	UNIPROT:P22636	0.148649	RXN-11458	RXN-10889	0.283608
UNIPROT:P31112	UNIPROT:Q56166	0.154717	RXN-11458	RXN-11977	0.350632
UNIPROT:P31112	UNIPROT:Q56167	0.181818	RXN-11458	RXN-11977	0.350632
UNIPROT:P31112	UNIPROT:P9WIM5	0.110236	RXN-11458	RXN-17288	0.29421
UNIPROT:P31112	UNIPROT:Q8KQE6	0.201102	RXN-11458	RXN-17639	0.887563
UNIPROT:P31112	UNIPROT:Q8KQE9	0.194872	RXN-11458	RXN-17639	0.887563
UNIPROT:P31112	UNIPROT:Q9AJE3	0.209003	RXN-11458	RXN-9455	0.186902
UNIPROT:P31112	UNIPROT:A0A096ZED0	0.156051	RXN-11458	RXN-16303	0.220692
UNIPROT:P31112	UNIPROT:A0A096ZEC9	0.198171	RXN-11458	RXN-16303	0.220692
UNIPROT:P31112	UNIPROT:Q8TUC0	0.205556	RXN-11458	RXN-13080	0.298695
UNIPROT:P31112	UNIPROT:A8NU13	0.179941	RXN-11458	RXN-8551	0.280739
UNIPROT:P31112	UNIPROT:P21258	0.215584	RXN-11458	RXN-11459	0.243013
UNIPROT:P31112	UNIPROT:A0A072UVA5	0.153846	RXN-11458	RXN-3585	0.222081
UNIPROT:P31112	UNIPROT:A0A2P6Q9N0	0.146825	RXN-11458	RXN-3585	0.222081
UNIPROT:P31112	UNIPROT:A0A396HBZ7	0.143426	RXN-11458	RXN-3585	0.222081
UNIPROT:P31112	UNIPROT:Q9L4W8	0.188442	RXN-11458	RXN-16252	0.707041
UNIPROT:P31112	UNIPROT:B5GVJ0	0.137324	RXN-11458	RXN-16879	0.307362
UNIPROT:P31112	UNIPROT:Q55217	0.181208	RXN-11458	RXN-14861	0.18796
UNIPROT:P31112	UNIPROT:Q841L0	0.155488	RXN-11458	RXN-15927	0.310084
UNIPROT:P31112	UNIPROT:P07383	0.145985	RXN-11458	TROPINESTERASE-RXN	0.176448
UNIPROT:P31112	UNIPROT:Q9ALM9	0.135659	RXN-11458	RXN-13633	0.23607
UNIPROT:P31112	UNIPROT:Q57900	0.183267	RXN-11458	RXN-15944	0.350593
UNIPROT:P31112	UNIPROT:R9TPE4	0.171315	RXN-11458	RXN-11518	0.861238
UNIPROT:P31112	UNIPROT:M1EY73	0.17193	RXN-11458	RXN-11518	0.861238
UNIPROT:P31112	UNIPROT:E5AX04	0.206704	RXN-11458	RXN-13073	0.239845
UNIPROT:P31112	UNIPROT:E8W6C7	0.176966	RXN-11458	RXN-18793	0.301979
UNIPROT:P31112	UNIPROT:Q643C8	0.166172	RXN-11458	RXN-14468	0.350202
UNIPROT:P31112	UNIPROT:Q54375	0.139442	RXN-11458	RXN-21213	0.145013
UNIPROT:P31112	UNIPROT:P0ABK5	0.18323	RXN-11458	S-CARBOXYMETHYLCYSTEINE-SYNTHASE-RXN	0.259785
UNIPROT:P31112	UNIPROT:C6WFL3	0.191099	RXN-11458	RXN-17373	0.257305
UNIPROT:P31112	UNIPROT:E2PZ87	0.189504	RXN-11458	RXN-16869	0.224885
UNIPROT:P31112	UNIPROT:Q05590	0.135458	RXN-11458	RXN-8761	0.150918
UNIPROT:P31112	UNIPROT:Q9ZHQ4	0.183673	RXN-11458	DEMETHYLMACROCIN-O-METHYLTRANSFERASE-RXN	0.209318
UNIPROT:P31112	UNIPROT:W0LV34	0.172297	RXN-11458	RXN-15400	0.126832
UNIPROT:P31112	UNIPROT:Q841K5	0.193384	RXN-11458	RXN-15938	0.244976
UNIPROT:P31112	UNIPROT:Q8TKU6	0.198966	RXN-11458	R231-RXN	0.274785
UNIPROT:P31112	UNIPROT:A2AXG5	0.188552	RXN-11458	RXN-15421	0.173809
UNIPROT:P31112	UNIPROT:Q54355	0.199367	RXN-11458	RXN-21208	0.265245
UNIPROT:P31112	UNIPROT:P77503	0.182336	RXN-11458	RXN-20682	0.862735
UNIPROT:P31112	UNIPROT:Q56772	0.164835	RXN-11458	RXN-11800	0.20717
UNIPROT:P31112	UNIPROT:D3WZ86	0.183267	RXN-11458	RXN-14253	0.248631
UNIPROT:P31112	UNIPROT:Q5V8A6	0.207692	RXN-11458	RXN-17002	0.150643
UNIPROT:P31112	UNIPROT:Q84IP8	0.176301	RXN-11458	RXN-10897	0.229316
UNIPROT:P31112	UNIPROT:Q8RJ47	0.182635	RXN-11458	RXN-10897	0.229316
UNIPROT:P31112	UNIPROT:B7X4E0	0.172078	RXN-11458	RXN-15638	0.217841
UNIPROT:P31112	UNIPROT:A9AWD6	0.162069	RXN-11458	RXN-18973	0.191689
UNIPROT:P31112	UNIPROT:Q9AJC6	0.21039	RXN-11458	RXN-8808	0.866728
UNIPROT:P31112	UNIPROT:O33708	0.177632	RXN-11458	RXN-18003	0.793442
UNIPROT:P31112	UNIPROT:Q8X5N4	0.167331	RXN-11458	RXN-18463	0.683325
UNIPROT:P31112	UNIPROT:S4W780	0.18663	RXN-11458	RXN-16694	0.275093
UNIPROT:P31112	UNIPROT:P35270	0.147727	RXN-11458	1.1.1.220-RXN	0.886344
UNIPROT:P31112	UNIPROT:A0A1X9QHJ0	0.208333	RXN-11458	1.1.1.285-RXN	0.83858
UNIPROT:P31112	UNIPROT:Q0PCF5	0.205696	RXN-11458	1.1.1.285-RXN	0.83858
UNIPROT:P31112	UNIPROT:P54997	0.18956	RXN-11458	RXN-624	0.242011
UNIPROT:P31112	UNIPROT:P43623	0.188791	RXN-11458	RXN-19561	0.258815
UNIPROT:P31112	UNIPROT:Q8L347	0.185567	RXN-11458	RXN-14763	0.885426
UNIPROT:P31112	UNIPROT:Q83WG6	0.181586	RXN-11458	RXN-10930	0.179464
UNIPROT:P31112	UNIPROT:Q5W242	0.190341	RXN-11458	RXN-15785	0.854822
UNIPROT:P31112	UNIPROT:Q8RMD4	0.167785	RXN-11458	RXN-16280	0.259156
UNIPROT:P31112	UNIPROT:Q8RMD1	0.142322	RXN-11458	RXN-16712	0.250219
UNIPROT:P31112	UNIPROT:Q75VW6	0.171091	RXN-11458	CITRATE--COA-LIGASE-RXN	0.214173
UNIPROT:P31112	UNIPROT:D2Z030	0.183946	RXN-11458	RXN-14460	0.393288
UNIPROT:P31112	UNIPROT:O86043	0.179283	RXN-11458	MALEYLPYRUVATE-ISOMERASE-RXN	0.250219
UNIPROT:P31112	UNIPROT:Q8NLC1	0.145669	RXN-11458	MALEYLPYRUVATE-ISOMERASE-RXN	0.250219
UNIPROT:P31112	UNIPROT:Q9WXT2	0.178462	RXN-11458	CEPHALOSPORIN-C-DEACETYLASE-RXN	0.167563
UNIPROT:P31112	UNIPROT:P94388	0.179245	RXN-11458	CEPHALOSPORIN-C-DEACETYLASE-RXN	0.167563
UNIPROT:P31112	UNIPROT:P11444	0.185915	RXN-11458	MANDELATE-RACEMASE-RXN	0.250219
UNIPROT:P31112	UNIPROT:A9CPS8	0.192182	RXN-11458	RXN-11152	0.286675
UNIPROT:P31112	UNIPROT:P0A955	0.165323	RXN-11458	RXN-13990	0.272668
UNIPROT:P31112	UNIPROT:B6CWJ2	0.129412	RXN-11458	RXN-12154	0.217437
UNIPROT:P31112	UNIPROT:Q2YIQ3	0.177994	RXN-11458	RXN-17771	0.250219
UNIPROT:P31112	UNIPROT:Q53U10	0.139785	RXN-11458	RXN-13177	0.196797
UNIPROT:P31112	UNIPROT:Q54360	0.134831	RXN-11458	RXN-21216	0.265321
UNIPROT:P31112	UNIPROT:Q8KDS7	0.169173	RXN-11458	RXN-19140	0.187478
UNIPROT:P31112	UNIPROT:P0A9S5	0.188525	RXN-11458	RXN-8632	0.883872
UNIPROT:P31112	UNIPROT:P15121	0.18038	RXN-11458	RXN-8632	0.883872
UNIPROT:P31112	UNIPROT:A1K6X2	0.161765	RXN-11458	1.14.13.61-RXN	0.870753
UNIPROT:P31112	UNIPROT:W8X526	0.145594	RXN-11458	RXN-20144	0.717974
UNIPROT:P31112	UNIPROT:A6KWY2	0.180064	RXN-11458	RXN-15924	0.864652
UNIPROT:P31112	UNIPROT:Q9AJU1	0.2	RXN-11458	RXN-15404	0.230683
UNIPROT:P31112	UNIPROT:A0A0H3L1B8	0.162162	RXN-11458	RXN-21280	0.299226
UNIPROT:P31112	UNIPROT:Q0P8V9	0.139098	RXN-11458	RXN-12235	0.236474
UNIPROT:P31112	UNIPROT:Q9ALN0	0.189873	RXN-11458	RXN-13631	0.246331
UNIPROT:P31112	UNIPROT:Q2L6E3	0.162866	RXN-11458	RXN-15425	0.147464
UNIPROT:P31112	UNIPROT:Q5KSN4	0.176271	RXN-11458	RXN-9299	0.189742
UNIPROT:P31112	UNIPROT:P13082	0.12406	RXN-11458	STREPTOMYCIN-3-KINASE-RXN	0.284606
UNIPROT:P31112	UNIPROT:P18150	0.143382	RXN-11458	STREPTOMYCIN-3-KINASE-RXN	0.284606
UNIPROT:P31112	UNIPROT:P0DL13	0.237389	RXN-11458	RXN-13761	0.276527
UNIPROT:P31112	UNIPROT:Q9HZV7	0.106061	RXN-11458	ISOHEXENYLGLUTACONYL-COA-HYDRATASE-RXN	0.158519
UNIPROT:P31112	UNIPROT:P21133	0.19382	RXN-11458	RXN-17061	0.162347
UNIPROT:P31112	UNIPROT:P0ACA7	0.179283	RXN-11458	RXN0-6549	0.245069
UNIPROT:P31112	UNIPROT:Q01109	0.158249	RXN-11458	RXN-10840	0.195363
UNIPROT:P31112	UNIPROT:B5GS26	0.175385	RXN-11458	RXN-12832	0.296225
UNIPROT:P31112	UNIPROT:A0A0A8J6B3	0.198864	RXN-11458	RXN-17078	0.204547
UNIPROT:P31112	UNIPROT:Q2MF64	0.143426	RXN-11458	RXN-13208	0.224722
UNIPROT:P31112	UNIPROT:A0A318P116	0.206806	RXN-11458	RXN-20719	0.173513
UNIPROT:P31112	PID:QDE10275.1	0.178125	RXN-11458	RXN-12208	0.886344
UNIPROT:P31112	UNIPROT:Q00460	0.17737	RXN-11458	RXN-18391	0.879759
UNIPROT:P31112	UNIPROT:P32352	0.16129	RXN-11458	RXN3O-203	0.181104
UNIPROT:P31112	UNIPROT:E5KJ99	0.144615	RXN-11458	RXN-18069	0.244022
UNIPROT:P31112	UNIPROT:D4GP31	0.171821	RXN-11458	RXN-12246	0.276798
UNIPROT:P31112	UNIPROT:A0A0H3C6P8	0.16955	RXN-11458	RXN-12246	0.276798
UNIPROT:P31112	UNIPROT:K4REZ6	0.123552	RXN-11458	RXN-18509	0.184123
UNIPROT:P31112	UNIPROT:G9EZR6	0.179878	RXN-11458	INDOLELACTATE-DEHYDROGENASE-RXN	0.820264
UNIPROT:P31112	UNIPROT:A0A1B4XTS0	0.2	RXN-11458	L-XYLOSE-1-DEHYDROGENASE-RXN	0.861312
UNIPROT:P31112	UNIPROT:Q58247	0.160156	RXN-11458	RXN-12356	0.187349
UNIPROT:P31112	UNIPROT:P52984	0.159363	RXN-11458	GALACTOACETYLTRAN-RXN	0.302246
UNIPROT:P31112	UNIPROT:B5HDJ6	0.178571	RXN-11458	RXN-18886	0.285466
UNIPROT:P31112	UNIPROT:O87833	0.196891	RXN-11458	RXN-12802	0.253463
UNIPROT:P31112	UNIPROT:Q6N8W7	0.162963	RXN-11458	RXN-13392	0.146219
UNIPROT:P31112	UNIPROT:P84888	0.205656	RXN-11458	ARALKYLAMINE-DEHYDROGENASE-RXN	0.253131
UNIPROT:P31112	UNIPROT:Q0X0A8	0.175719	RXN-11458	RXN-17156	0.161253
UNIPROT:P31112	UNIPROT:Q97K92	0.2	RXN-11458	RXN-14692	0.888795
UNIPROT:P31112	UNIPROT:E3SET7	0.164	RXN-11458	RXN-19528	0.228039
UNIPROT:P31112	UNIPROT:Q93TU6	0.127413	RXN-11458	RXN-13332	0.215269
UNIPROT:P31112	UNIPROT:A0A482UYG1	0.196335	RXN-11458	RXN-15617	0.269029
UNIPROT:P31112	UNIPROT:Q988D0	0.15748	RXN-11458	4.1.1.51-RXN	0.253549
UNIPROT:P31112	UNIPROT:O82834	0.179641	RXN-11458	RXN-10895	0.176497
UNIPROT:P31112	PID:AAH25724	0.173077	RXN-11458	RXN-13363	0.832199
UNIPROT:P31112	UNIPROT:Q0QLF5	0.167224	RXN-11458	1.1.1.291-RXN	0.867558
UNIPROT:P31112	UNIPROT:P83772	0.130268	RXN-11458	CREATININASE-RXN	0.23506
UNIPROT:P31112	UNIPROT:O66183	0.133588	RXN-11458	CREATININASE-RXN	0.23506
UNIPROT:P31112	UNIPROT:B0R5X4	0.163934	RXN-11458	RXN-6261	0.162568
UNIPROT:P31112	UNIPROT:Q05600	0.170347	RXN-11458	RXN-6261	0.162568
UNIPROT:P31112	UNIPROT:P21634	0.196825	RXN-11458	RXN-6261	0.162568
UNIPROT:P31112	UNIPROT:Q194Q1	0.171779	RXN-11458	RXN-13385	0.657045
UNIPROT:P31112	UNIPROT:O66188	0.106719	RXN-11458	RXN-1761	0.251178
UNIPROT:P31112	UNIPROT:B0CN28	0.194521	RXN-11458	RXN-15302	0.269545
UNIPROT:P31112	UNIPROT:P29082	0.15534	RXN-11458	1.13.11.55-RXN	0.252994
UNIPROT:P31112	UNIPROT:A0A1V0ELS9	0.19086	RXN-11458	RXN-19523	0.249365
UNIPROT:P31112	UNIPROT:P76423	0.125475	RXN-11458	RXN0-7298	0.397129
UNIPROT:P31112	UNIPROT:Q8ZL58	0.225316	RXN-11458	RXN-16224	0.308665
UNIPROT:P31112	UNIPROT:P00733	0.131274	RXN-11458	RXN-15275	0.274342
UNIPROT:P31112	UNIPROT:Q4K1B3	0.130952	RXN-11458	RXN-13104	0.240111
UNIPROT:P31112	UNIPROT:P25741	0.139098	RXN-11458	RXN0-5121	0.224518
UNIPROT:P31112	UNIPROT:M1RY63	0.140562	RXN-11458	RXN-15933	0.243362
UNIPROT:P31112	UNIPROT:C4WIL4	0.170068	RXN-11458	1.13.11.28-RXN	0.254248
UNIPROT:P31112	UNIPROT:Q9L9F2	0.150943	RXN-11458	RXN-14545	0.230252
UNIPROT:P31112	UNIPROT:C0JRF9	0.172638	RXN-11458	RXN-16917	0.300114
UNIPROT:P31112	UNIPROT:Q988C8	0.175896	RXN-11458	RXN-19622	0.861981
UNIPROT:P31112	UNIPROT:Q42605	0.216763	RXN-11458	UDP-ARABINOSE-4-EPIMERASE-RXN	0.250219
UNIPROT:P31112	UNIPROT:Q92WA3	0.182927	RXN-11458	UDP-ARABINOSE-4-EPIMERASE-RXN	0.250219
UNIPROT:P31112	UNIPROT:P77256	0.193252	RXN-11458	RXN0-5213	0.881599
UNIPROT:P31112	UNIPROT:D1H0I0	0.143969	RXN-11458	RXN-16841	0.246526
UNIPROT:P31112	UNIPROT:S6AU36	0.184136	RXN-11458	RXN-15022	0.171099
UNIPROT:P31112	UNIPROT:A4F5C0	0.175385	RXN-11458	RXN-15022	0.171099
UNIPROT:P31112	UNIPROT:C5CBV8	0.13834	RXN-11458	2.4.1.54-RXN	0.211772
UNIPROT:P31112	UNIPROT:O86507	0.14	RXN-11458	UREASE-RXN	0.256489
UNIPROT:P31112	UNIPROT:Q4ZUD1	0.143426	RXN-11458	UREASE-RXN	0.256489
UNIPROT:P31112	UNIPROT:Q5J1R4	0.201511	RXN-11458	RXN-17842	0.180427
UNIPROT:P31112	UNIPROT:Q0P8T1	0.222222	RXN-11458	RXN-12238	0.204547
UNIPROT:P31112	UNIPROT:Q5ZXH9	0.247191	RXN-11458	RXN-12238	0.204547
UNIPROT:P31112	UNIPROT:O31201	0.11985	RXN-11458	N-FORMYLGLUTAMATE-DEFORMYLASE-RXN	0.299587
UNIPROT:P31112	UNIPROT:D4HRI4	0.185075	RXN-11458	RXN-15545	0.242196
UNIPROT:P31112	UNIPROT:M1WXK8	0.122605	RXN-11458	RXN-15017	0.870257
[truncated: 331,704+ more rows]
